# Supplementary material for: Toxicity Effects of Combined Mixtures of BDE-47 and Nickel on the Microalgae Phaeodactylum tricornutum (Bacillariophyceae)
Source: MDPI journal article supplement (doi:10.3390/toxics10050211), 2022-04-22
Supplement: s1 [file s1]

# Supplementary Materials: Toxicity Effects of Combined Mixtures of BDE-47 and Nickel on the Microalgae *Phaeodactylum tricornutum* (Bacillariophyceae)

Xiaolai Shi, Ruoyu Guo, Douding Lu, Pengbin Wang and Xinfeng Dai

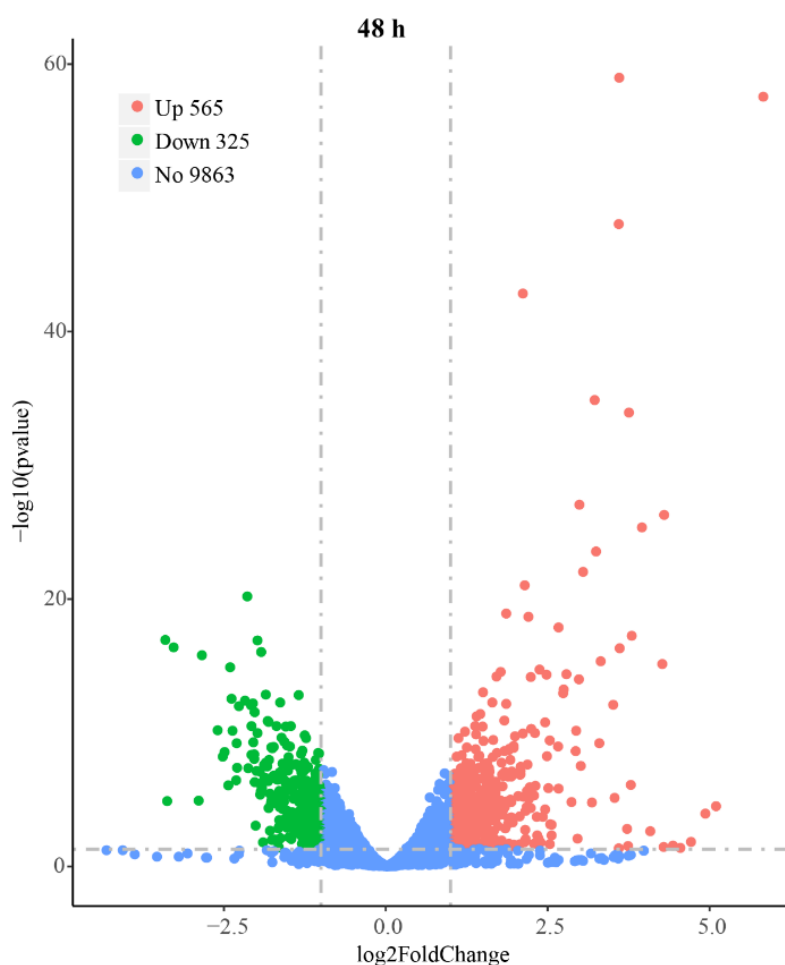

**Figure S1.** Volcano plot of differentially expressed genes under 2.5 mg/L mixtures treatment for 48 h.

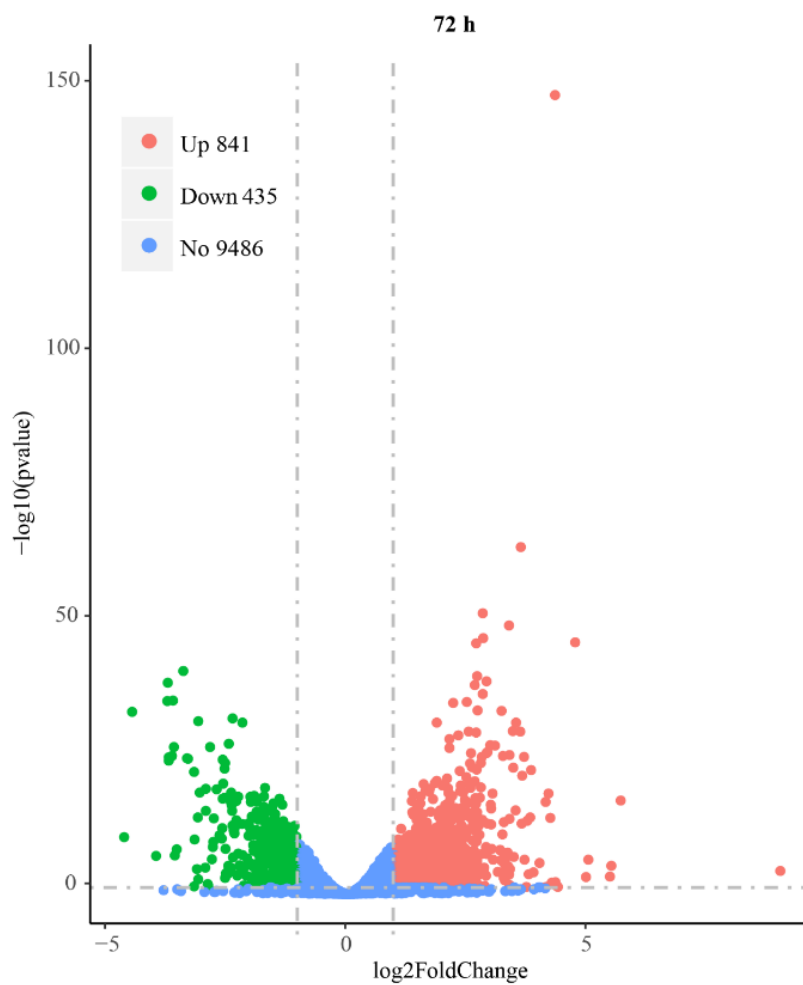

**Figure S2.** Volcano plot of differentially expressed genes under 2.5 mg/L mixtures treatment for 72 h.

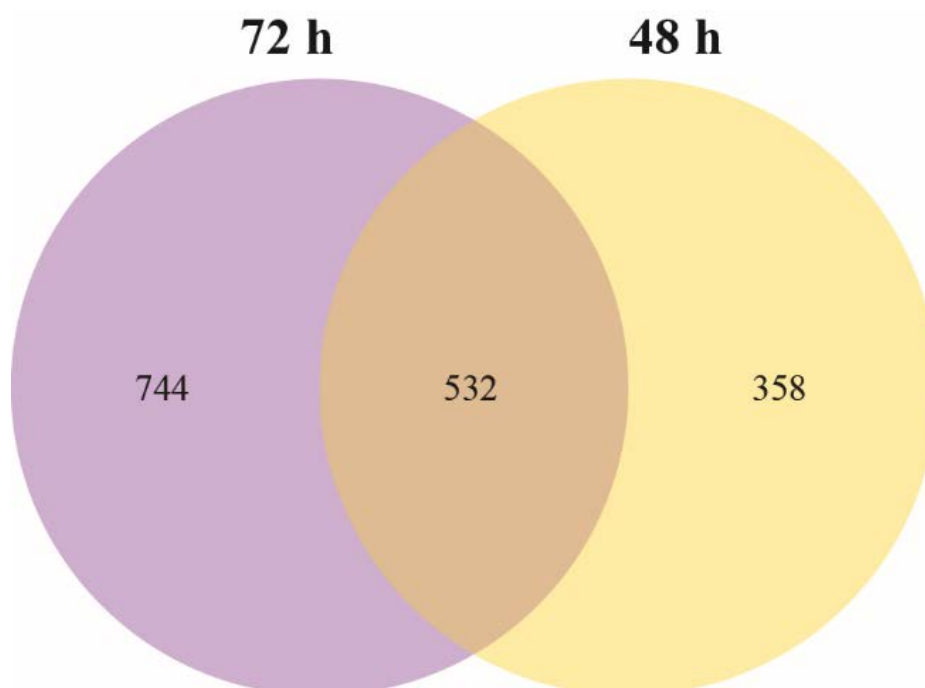

**Figure S3.** Venn diagram of differentially expressed genes under 2.5 mg/L mixtures treatment for 48 and 72 h.
