# Supplementary material for: Toxicity Effects of Combined Mixtures of BDE-47 and Nickel on the Microalgae Phaeodactylum tricornutum (Bacillariophyceae)
Source: Toxics. 2022 Apr 22;10(5):211. doi: 10.3390/toxics10050211 (PMC9143900; doi:10.3390/toxics10050211)
Supplement: Supplementary file 1 [file toxics-10-00211-s001.zip › Supplementary Tables.xlsx]

## Sheet: Table S1
	Table S1 Chemical concentrations tested in this study
		Final concentraions
Isolate BDE-47	Expect BDE-47	0.25	1	2.5	4	8	16	40	65
	Actual BDE-47	0.2	0.8	2.3	3.7	7.2	14.5	38.9	62
Mixtures
	Expect Nickel	0.45	0.9	1.8	3.6	7.2	18
	Actual Nickel	0.34	0.81	1.76	3.5	7.1	17.9
	Expect BDE-47	0.15	0.3	0.6	2.4	4.8	14
	Actual BDE-47	0.13	0.29	0.51	2.1	4.4	12.3
	Actual total	0.47	1.1	2.27	5.6	11.5	30.2
	Expected total	0.6	1.2	2.4	6	12	32
							0
																X=BDE-47
																Y=Nickel

## Sheet: Table S2 
Table S2 Results of Levene statistic test to determine homoscedasticity in data and statistic method used in ANOVA
Analyzed response	Levene statistic	P	Test Method
ROS	2.724	0.002	Games-Howell
Photosynthesis	3.096	0	Games-Howell
Cell abundance	4.183	0	Games-Howell

## Sheet: Table S3
Table S3 The P value of comparisons wiht Games-Howell of Cell abundance
Games-Howell
Dependent Variable			P
24 h	DMSO	0 mg	0.999997
		BED-47-0.2 mg	1
		BED-47-0.8 mg	1
		BED-47-2.3 mg	0.934701
		BED-47-3.7 mg	0.999999
		BED-47-7.2 mg	0.480653
		BED-47-14.5 mg	0.255504
		BED-47-38.9 mg	0.167474
		BED-47-62 mg	0.0585242
		Ni&B-0.47 mg	0.768324
		Ni&B-1.10 mg	0.97467
		Ni&B-2.27 mg	0.568614
		Ni&B-5.57 mg	0.79179
		Ni&B-13.5 mg	0.714095
		Ni&B-30.13 mg	0.249255
48 h	DMSO	0 mg	0.999999
		BED-47-0.2 mg	0.596842
		BED-47-0.8 mg	0.431119
		BED-47-2.3 mg	0.256739
		BED-47-3.7 mg	0.999998
		BED-47-7.2 mg	0.278562
		BED-47-14.5 mg	0.0157767
		BED-47-38.9 mg	0.000490113
		BED-47-62 mg	0.00170749
		Ni&B-0.47 mg	0.47904
		Ni&B-1.10 mg	0.0079611
		Ni&B-2.27 mg	0.02215
		Ni&B-5.57 mg	0.087304
		Ni&B-13.5 mg	0.0187039
		Ni&B-30.13 mg	0.000105707
72 h	DMSO	0 mg	0.477698
		BED-47-0.2 mg	1
		BED-47-0.8 mg	1
		BED-47-2.3 mg	0.999175
		BED-47-3.7 mg	0.643679
		BED-47-7.2 mg	0.974232
		BED-47-14.5 mg	0.164713
		BED-47-38.9 mg	0.000202492
		BED-47-62 mg	0.00130736
		Ni&B-0.47 mg	0.0913079
		Ni&B-1.10 mg	0.0495701
		Ni&B-2.27 mg	6.40914e-05
		Ni&B-5.57 mg	0.00767185
		Ni&B-13.5 mg	0.000413693
		Ni&B-30.13 mg	0.000391319
96h	DMSO	0 mg	1
		BED-47-0.2 mg	1
		BED-47-0.8 mg	0.954375
		BED-47-2.3 mg	0.0920632
		BED-47-3.7 mg	0.0285241
		BED-47-7.2 mg	0.127953
		BED-47-14.5 mg	0.0153863
		BED-47-38.9 mg	6.11851e-05
		BED-47-62 mg	0.000144222
		Ni&B-0.47 mg	0.169928
		Ni&B-1.10 mg	0.0437072
		Ni&B-2.27 mg	0.00613455
		Ni&B-5.57 mg	2.46452e-05
		Ni&B-13.5 mg	0.000780693
		Ni&B-30.13 mg	2.108e-05
*. The mean difference is significant at the 0.05 level.

## Sheet: Table S4
Table S4 The P value of comparisons wiht Games-Howell of photosynthesis
Games-Howell
Dependent Variable			P
24 h	DMSO	0 mg	0.999937
		BED-47-0.2 mg	0.549011
		BED-47-0.8 mg	0.415764
		BED-47-2.3 mg	0.404865
		BED-47-3.7 mg	0.755606
		BED-47-7.2 mg	0.941299
		BED-47-14.5 mg	0.765956
		BED-47-38.9 mg	0.380711
		BED-47-62 mg	0.64741
		Ni&B-0.47 mg	1
		Ni&B-1.10 mg	1
		Ni&B-2.27 mg	0.999381
		Ni&B-5.57 mg	0.999143
		Ni&B-13.5 mg	0.368381
		Ni&B-30.13 mg	0.313792
48 h	DMSO	0 mg	0.999986
		BED-47-0.2 mg	0.357747
		BED-47-0.8 mg	0.25901
		BED-47-2.3 mg	0.994949
		BED-47-3.7 mg	0.700513
		BED-47-7.2 mg	0.894948
		BED-47-14.5 mg	0.0465788
		BED-47-38.9 mg	0.0510648
		BED-47-62 mg	0.00878413
		Ni&B-0.47 mg	0.0694609
		Ni&B-1.10 mg	0.0100032
		Ni&B-2.27 mg	0.001388
		Ni&B-5.57 mg	0.001323
		Ni&B-13.5 mg	6.32172e-05
		Ni&B-30.13 mg	1.71876e-05
72 h	DMSO	0 mg	0.999871
		BED-47-0.2 mg	0.0164864
		BED-47-0.8 mg	0.17926
		BED-47-2.3 mg	0.0205655
		BED-47-3.7 mg	0.123637
		BED-47-7.2 mg	0.0118579
		BED-47-14.5 mg	0.0306747
		BED-47-38.9 mg	0.025504
		BED-47-62 mg	0.0127698
		Ni&B-0.47 mg	0.247525
		Ni&B-1.10 mg	0.000432116
		Ni&B-2.27 mg	0.000338483
		Ni&B-5.57 mg	7.28401e-05
		Ni&B-13.5 mg	0.000418118
		Ni&B-30.13 mg	0.00156589
96 h	DMSO	0 mg	0.999996
		BED-47-0.2 mg	0.0767621
		BED-47-0.8 mg	0.0992376
		BED-47-2.3 mg	0.313251
		BED-47-3.7 mg	0.0594863
		BED-47-7.2 mg	0.138556
		BED-47-14.5 mg	0.0450544
		BED-47-38.9 mg	0.0115559
		BED-47-62 mg	0.126794
		Ni&B-0.47 mg	0.00262068
		Ni&B-1.10 mg	7.30361e-05
		Ni&B-2.27 mg	0.000265765
		Ni&B-5.57 mg	3.19852e-05
		Ni&B-13.5 mg	1.30383e-05
		Ni&B-30.13 mg	4.49771e-07
*. The mean difference is significant at the 0.05 level.

## Sheet: Table S5
Table S5 The P value of comparisons wiht Games-Howell of ROS
Games-Howell
Dependent Variable			P
24 h	DMSO	0 mg	1
		BDE-47-0.8 mg	1
		BDE-47-3.7 mg	0.928483
		BDE-47-7.2 mg	0.636297
		Ni&B 1.10 mg	0.322442
		Ni&B 2.27 mg	0.00564764
		Ni&B 13.5 mg	0.00135061
48 h	DMSO	0 mg	0.999967
		BDE-47-0.8 mg	0.999999
		BDE-47-3.7 mg	0.993802
		BDE-47-7.2 mg	0.999079
		Ni&B 1.10 mg	0.99755
		Ni&B 2.27 mg	0.000252653
		Ni&B 13.5 mg	0.000167788
72 h	DMSO	0 mg	0.975352
		BDE-47-0.8 mg	1
		BDE-47-3.7 mg	0.981086
		BDE-47-7.2 mg	0.992778
		Ni&B 1.10 mg	0.700611
		Ni&B 2.27 mg	0.0279108
		Ni&B 13.5 mg	2.35981e-06
	BDE-47-2.5 mg	0 mg	0.981876
		BDE-47-0.8 mg	1
		BDE-47-3.7 mg	0.986413
		BDE-47-7.2 mg	0.995255
		Ni&B 1.10 mg	0.730109
		Ni&B 2.27 mg	0.0308375
		Ni&B 13.5 mg	2.54886e-06
*. The mean difference is significant at the 0.05 level.

## Sheet: Table S6
Table S6 DEGs related to photosynthesis
gene_id	48-log2FoldChange	pvalue	padj	72-log2FoldChange	pvalue	padj	gene_name	gene_chr	gene_start	gene_end	gene_strand	gene_length	gene_biotype	gene_description	tf_family	biological_process	biological_process_description	cellular_component	cellular_component_description	molecular_function	molecular_function_description	pathway_id	pathway
7195163	3.2098	1.39933e-35	3.00913e-32	1.49081	2.10105e-09	5.43395e-08	Lhcf15	NC_011687.1	569585	570772	+	1013	protein_coding	protein fucoxanthin chlorophyll a/c protein && Q40301.1 RecName: Full=Fucoxanthin-chlorophyll a-c binding protein E, chloroplastic; Flags: Precursor && PF00504:Chlorophyll A-B binding protein	-	--	--	--	--	--	--	--	--
7196652	1.55115	1.95238e-08	1.74933e-06	1.06399	4.14276e-06	4.99686e-05	Fba4	NC_011669.1	95522	97171	+	1469	protein_coding	cytosolic aldolase && Q8ELI2.1 RecName: Full=Fructose-bisphosphate aldolase class 1; AltName: Full=Fructose-bisphosphate aldolase class I; Short=FBP aldolase && -	-	--	--	--	--	--	--	pti00010||pti00030||pti00051||pti00710||pti01100||pti01110||pti01200||pti01230	Glycolysis / Gluconeogenesis||Pentose phosphate pathway||Fructose and mannose metabolism||Carbon fixation in photosynthetic organisms||Metabolic pathways||Biosynthesis of secondary metabolites||Carbon metabolism||Biosynthesis of amino acids
7196764	1.46295	0.000436794	0.00625354	1.37839	0.000524448	0.00339095	PHATRDRAFT_43164	NC_011669.1	2211807	2212842	-	956	protein_coding	predicted protein && O48741.1 RecName: Full=Protochlorophyllide reductase C, chloroplastic; Short=PCR C; AltName: Full=NADPH-protochlorophyllide oxidoreductase C; Short=POR C; Flags: Precursor && PF00106:short chain dehydrogenase	adh_short	GO:0008152||GO:0008150	metabolic process||biological_process			GO:0016491||GO:0003674||GO:0003824	oxidoreductase activity||molecular_function||catalytic activity	--	--
7200404	1.41238	0.000701228	0.00878502	1.34245	0.000670803	0.00416092	PHATRDRAFT_5902	NC_011675.1	802070	802804	+	639	protein_coding	predicted protein && Q8YVS7.1 RecName: Full=Heme oxygenase 1 && PF01126:Heme oxygenase	-	GO:0006788||GO:0055114||GO:0008152||GO:0006725||GO:0006778||GO:0006787||GO:0006807||GO:0008150||GO:0009056||GO:0009987||GO:0019439||GO:0033013||GO:0033015||GO:0034641||GO:0042168||GO:0042440||GO:0044237||GO:0044248||GO:0044270||GO:0046483||GO:0046700||GO:0051186||GO:0051187||GO:0071704||GO:1901360||GO:1901361||GO:1901564||GO:1901565||GO:1901575	heme oxidation||oxidation-reduction process||metabolic process||cellular aromatic compound metabolic process||porphyrin-containing compound metabolic process||porphyrin-containing compound catabolic process||nitrogen compound metabolic process||biological_process||catabolic process||cellular process||aromatic compound catabolic process||tetrapyrrole metabolic process||tetrapyrrole catabolic proce…			GO:0004392||GO:0003674||GO:0003824||GO:0016491||GO:0016705	heme oxygenase (decyclizing) activity||molecular_function||catalytic activity||oxidoreductase activity||oxidoreductase activity, acting on paired donors, with incorporation or reduction of molecular oxygen	pti00860||pti01100||pti01110	Porphyrin and chlorophyll metabolism||Metabolic pathways||Biosynthesis of secondary metabolites
7202457	1.30207	0.000261143	0.00409907	0.978488	1.09014e-05	0.000116938	TIM_1	NC_011681.1	595581	596584	-	1004	protein_coding	isomerase triosephosphate isomerase && P21820.1 RecName: Full=Triosephosphate isomerase, cytosolic; Short=TIM; Short=Triose-phosphate isomerase && PF00121:Triosephosphate isomerase	-	GO:0008152||GO:0008150	metabolic process||biological_process			GO:0004807||GO:0003674||GO:0003824||GO:0016853||GO:0016860||GO:0016861	triose-phosphate isomerase activity||molecular_function||catalytic activity||isomerase activity||intramolecular oxidoreductase activity||intramolecular oxidoreductase activity, interconverting aldoses and ketoses	pti00010||pti00051||pti00562||pti00710||pti01100||pti01110||pti01200||pti01230	Glycolysis / Gluconeogenesis||Fructose and mannose metabolism||Inositol phosphate metabolism||Carbon fixation in photosynthetic organisms||Metabolic pathways||Biosynthesis of secondary metabolites||Carbon metabolism||Biosynthesis of amino acids
7202915	1.29987	8.05071e-05	0.00161495	1.10022	6.13492e-07	9.00486e-06	Fba3	NC_011682.1	707216	708876	+	1417	protein_coding	cytosolic class II aldolase && Q9URB4.2 RecName: Full=Fructose-bisphosphate aldolase; Short=FBP aldolase; Short=FBPA; AltName: Full=37 kDa major allergen; AltName: Full=Fructose-1,6-bisphosphate aldolase; AltName: Full=IgE-binding allergen && PF01116:Fructose-bisphosphate aldolase class-II	F_bP_aldolase	GO:0005975||GO:0008152||GO:0008150||GO:0044238||GO:0071704	carbohydrate metabolic process||metabolic process||biological_process||primary metabolic process||organic substance metabolic process			GO:0008270||GO:0016832||GO:0003674||GO:0005488||GO:0046872||GO:0043167||GO:0043169||GO:0046914||GO:0003824||GO:0016829||GO:0016830	zinc ion binding||aldehyde-lyase activity||molecular_function||binding||metal ion binding||ion binding||cation binding||transition metal ion binding||catalytic activity||lyase activity||carbon-carbon lyase activity	pti00010||pti00030||pti00051||pti00710||pti01100||pti01110||pti01200||pti01230	Glycolysis / Gluconeogenesis||Pentose phosphate pathway||Fructose and mannose metabolism||Carbon fixation in photosynthetic organisms||Metabolic pathways||Biosynthesis of secondary metabolites||Carbon metabolism||Biosynthesis of amino acids
7199266	1.23923	1.67384e-05	0.000468542	1.03127	5.3748e-05	0.000470524	FbaC5	NC_011698.1	131449	133095	-	1552	protein_coding	fructose-bisphosphate aldolase && Q944G9.2 RecName: Full=Fructose-bisphosphate aldolase 2, chloroplastic; Short=AtFBA2; Flags: Precursor && PF00274:Fructose-bisphosphate aldolase class-I	-	GO:0006096||GO:0008152||GO:0005975||GO:0006082||GO:0006090||GO:0006091||GO:0006139||GO:0006163||GO:0006164||GO:0006165||GO:0006725||GO:0006732||GO:0006733||GO:0006753||GO:0006754||GO:0006757||GO:0006793||GO:0006796||GO:0006807||GO:0008150||GO:0009056||GO:0009058||GO:0009108||GO:0009117||GO:0009123||GO:0009124||GO:0009126||GO:0009127||GO:0009132||GO:0009135||GO:0009141||GO:0009142||GO:0009144||GO:…	glycolytic process||metabolic process||carbohydrate metabolic process||organic acid metabolic process||pyruvate metabolic process||generation of precursor metabolites and energy||nucleobase-containing compound metabolic process||purine nucleotide metabolic process||purine nucleotide biosynthetic process||nucleoside diphosphate phosphorylation||cellular aromatic compound metabolic process||coenzym…			GO:0004332||GO:0003674||GO:0003824||GO:0016829||GO:0016830||GO:0016832	fructose-bisphosphate aldolase activity||molecular_function||catalytic activity||lyase activity||carbon-carbon lyase activity||aldehyde-lyase activity	pti00010||pti00030||pti00051||pti00710||pti01100||pti01110||pti01200||pti01230	Glycolysis / Gluconeogenesis||Pentose phosphate pathway||Fructose and mannose metabolism||Carbon fixation in photosynthetic organisms||Metabolic pathways||Biosynthesis of secondary metabolites||Carbon metabolism||Biosynthesis of amino acids
7198478	1.17472	4.81886e-05	0.00109309	1.29673	3.53562e-08	7.09696e-07	Lhcf11	NC_011692.1	468299	468975	-	677	protein_coding	protein fucoxanthin chlorophyll a/c protein && Q41094.1 RecName: Full=Fucoxanthin-chlorophyll a-c binding protein F, chloroplastic; Flags: Precursor && PF00504:Chlorophyll A-B binding protein	-	--	--	--	--	--	--	--	--
7203602	1.1231	5.16737e-06	0.000178076	1.85042	1.57542e-21	2.52984e-19	PEPCase_2	NC_011685.1	403161	406016	+	2741	protein_coding	predicted protein && A4XXP6.1 RecName: Full=Phosphoenolpyruvate carboxylase; Short=PEPC; Short=PEPCase && PF00311:Phosphoenolpyruvate carboxylase	-	GO:0006099||GO:0015977||GO:0008152||GO:0006082||GO:0006091||GO:0006101||GO:0055114||GO:0008150||GO:0009060||GO:0009987||GO:0015980||GO:0016999||GO:0017144||GO:0019752||GO:0043436||GO:0044237||GO:0044238||GO:0044281||GO:0045333||GO:0071704||GO:0072350	tricarboxylic acid cycle||carbon fixation||metabolic process||organic acid metabolic process||generation of precursor metabolites and energy||citrate metabolic process||oxidation-reduction process||biological_process||aerobic respiration||cellular process||energy derivation by oxidation of organic compounds||antibiotic metabolic process||drug metabolic process||carboxylic acid metabolic process||…			GO:0003824||GO:0008964||GO:0003674||GO:0004611||GO:0016829||GO:0016830||GO:0016831	catalytic activity||phosphoenolpyruvate carboxylase activity||molecular_function||phosphoenolpyruvate carboxykinase activity||lyase activity||carbon-carbon lyase activity||carboxy-lyase activity	pti00620||pti00710||pti01100||pti01200	Pyruvate metabolism||Carbon fixation in photosynthetic organisms||Metabolic pathways||Carbon metabolism
7197563	0.513406	0.195962	0.399353	1.28457	0.00463686	0.0206833	TPI/GapC3	NC_011670.1	712196	714407	-	1986	protein_coding	triosephosphate isomerase/glyceraldehyde-3-phosphate dehydrogenase precursor && P26988.1 RecName: Full=Glyceraldehyde-3-phosphate dehydrogenase; Short=GAPDH && PF00121:Triosephosphate isomerase|PF00044:Glyceraldehyde 3-phosphate dehydrogenase, NAD binding domain|PF02800:Glyceraldehyde 3-phosphate dehydrogenase, C-terminal domain	-	GO:0008152||GO:0055114||GO:0008150	metabolic process||oxidation-reduction process||biological_process			GO:0004807||GO:0016620||GO:0003674||GO:0003824||GO:0016853||GO:0016860||GO:0016861||GO:0016491||GO:0016903	triose-phosphate isomerase activity||oxidoreductase activity, acting on the aldehyde or oxo group of donors, NAD or NADP as acceptor||molecular_function||catalytic activity||isomerase activity||intramolecular oxidoreductase activity||intramolecular oxidoreductase activity, interconverting aldoses and ketoses||oxidoreductase activity||oxidoreductase activity, acting on the aldehyde or oxo group of…	pti00010||pti00710||pti01100||pti01110||pti01200||pti01230	Glycolysis / Gluconeogenesis||Carbon fixation in photosynthetic organisms||Metabolic pathways||Biosynthesis of secondary metabolites||Carbon metabolism||Biosynthesis of amino acids
7197206	0.477129	0.283612	0.495273	2.63341	0.000500328	0.0032638	GapC4	NC_011670.1	715026	716234	+	1011	protein_coding	predicted protein && P26988.1 RecName: Full=Glyceraldehyde-3-phosphate dehydrogenase; Short=GAPDH && PF02800:Glyceraldehyde 3-phosphate dehydrogenase, C-terminal domain|PF00044:Glyceraldehyde 3-phosphate dehydrogenase, NAD binding domain	-	GO:0055114||GO:0008152||GO:0008150	oxidation-reduction process||metabolic process||biological_process			GO:0016620||GO:0003674||GO:0003824||GO:0016491||GO:0016903	oxidoreductase activity, acting on the aldehyde or oxo group of donors, NAD or NADP as acceptor||molecular_function||catalytic activity||oxidoreductase activity||oxidoreductase activity, acting on the aldehyde or oxo group of donors	pti00010||pti00710||pti01100||pti01110||pti01200||pti01230	Glycolysis / Gluconeogenesis||Carbon fixation in photosynthetic organisms||Metabolic pathways||Biosynthesis of secondary metabolites||Carbon metabolism||Biosynthesis of amino acids
7197662	0.266261	0.429362	0.635212	1.1589	0.000457499	0.0030328	PHATRDRAFT_33844	NC_011672.1	486520	487191	-	672	protein_coding	predicted protein && - && PF01789:PsbP	-	GO:0015979||GO:0008152||GO:0008150||GO:0009987||GO:0044237	photosynthesis||metabolic process||biological_process||cellular process||cellular metabolic process	GO:0009523||GO:0009654||GO:0019898||GO:0005622||GO:0005575||GO:0016020||GO:0005623||GO:0009521||GO:0009579||GO:0032991||GO:0034357||GO:0044424||GO:0044425||GO:0044436||GO:0044464||GO:0098796||GO:0042651||GO:1902494||GO:1990204	photosystem II||photosystem II oxygen evolving complex||extrinsic component of membrane||intracellular||cellular_component||membrane||cell||photosystem||thylakoid||protein-containing complex||photosynthetic membrane||intracellular part||membrane part||thylakoid part||cell part||membrane protein complex||thylakoid membrane||catalytic complex||oxidoreductase complex	GO:0005509||GO:0003674||GO:0005488||GO:0046872||GO:0043167||GO:0043169	calcium ion binding||molecular_function||binding||metal ion binding||ion binding||cation binding	--	--
7203017	0.0473585	0.863221	0.930462	-1.8214	9.11941e-12	3.46424e-10	GapC1	NC_011683.1	748753	750258	+	1256	protein_coding	glyceraldehyde-3-phosphate dehydrogenase precursor && O09452.1 RecName: Full=Glyceraldehyde-3-phosphate dehydrogenase, chloroplastic; AltName: Full=NAD(P)-dependent glyceraldehyde-3-phosphate dehydrogenase; Flags: Precursor && PF00044:Glyceraldehyde 3-phosphate dehydrogenase, NAD binding domain|PF02800:Glyceraldehyde 3-phosphate dehydrogenase, C-terminal domain	-	GO:0055114||GO:0008152||GO:0008150	oxidation-reduction process||metabolic process||biological_process			GO:0016620||GO:0003674||GO:0003824||GO:0016491||GO:0016903	oxidoreductase activity, acting on the aldehyde or oxo group of donors, NAD or NADP as acceptor||molecular_function||catalytic activity||oxidoreductase activity||oxidoreductase activity, acting on the aldehyde or oxo group of donors	pti00010||pti00710||pti01100||pti01110||pti01200||pti01230	Glycolysis / Gluconeogenesis||Carbon fixation in photosynthetic organisms||Metabolic pathways||Biosynthesis of secondary metabolites||Carbon metabolism||Biosynthesis of amino acids
7203195	-0.246325	0.315911	0.529265	-1.14661	0.00293299	0.0141634	PHATRDRAFT_29157	NC_011683.1	522021	523634	-	1461	protein_coding	predicted protein && Q9SBN4.1 RecName: Full=Phosphoglycerate kinase, chloroplastic; Flags: Precursor && PF00162:Phosphoglycerate kinase	-	GO:0006096||GO:0008152||GO:0005975||GO:0006082||GO:0006090||GO:0006091||GO:0006139||GO:0006163||GO:0006164||GO:0006165||GO:0006725||GO:0006732||GO:0006733||GO:0006753||GO:0006754||GO:0006757||GO:0006793||GO:0006796||GO:0006807||GO:0008150||GO:0009056||GO:0009058||GO:0009108||GO:0009117||GO:0009123||GO:0009124||GO:0009126||GO:0009127||GO:0009132||GO:0009135||GO:0009141||GO:0009142||GO:0009144||GO:…	glycolytic process||metabolic process||carbohydrate metabolic process||organic acid metabolic process||pyruvate metabolic process||generation of precursor metabolites and energy||nucleobase-containing compound metabolic process||purine nucleotide metabolic process||purine nucleotide biosynthetic process||nucleoside diphosphate phosphorylation||cellular aromatic compound metabolic process||coenzym…			GO:0004618||GO:0003674||GO:0003824||GO:0016301||GO:0016740||GO:0016772||GO:0016774	phosphoglycerate kinase activity||molecular_function||catalytic activity||kinase activity||transferase activity||transferase activity, transferring phosphorus-containing groups||phosphotransferase activity, carboxyl group as acceptor	pti00010||pti00710||pti01100||pti01110||pti01200||pti01230	Glycolysis / Gluconeogenesis||Carbon fixation in photosynthetic organisms||Metabolic pathways||Biosynthesis of secondary metabolites||Carbon metabolism||Biosynthesis of amino acids
7204128	-0.401833	NA	1	2.68466	0.0203218	0.0670406	HemF_2	NC_011671.1	1340236	1341114	-	879	protein_coding	coproporphyrinogen oxidase. coproporphyrinogen III oxidase. coproporphyrinogenase && P35055.1 RecName: Full=Oxygen-dependent coproporphyrinogen-III oxidase, chloroplastic; Short=Coprogen oxidase; Short=Coproporphyrinogenase; Flags: Precursor && PF01218:Coproporphyrinogen III oxidase	-	GO:0006779||GO:0055114||GO:0008152||GO:0006725||GO:0006778||GO:0006807||GO:0008150||GO:0009058||GO:0009987||GO:0018130||GO:0019438||GO:0033013||GO:0033014||GO:0034641||GO:0044237||GO:0044249||GO:0044271||GO:0046483||GO:0051186||GO:0051188||GO:0071704||GO:1901360||GO:1901362||GO:1901564||GO:1901566||GO:1901576	porphyrin-containing compound biosynthetic process||oxidation-reduction process||metabolic process||cellular aromatic compound metabolic process||porphyrin-containing compound metabolic process||nitrogen compound metabolic process||biological_process||biosynthetic process||cellular process||heterocycle biosynthetic process||aromatic compound biosynthetic process||tetrapyrrole metabolic process||t…			GO:0004109||GO:0003674||GO:0003824||GO:0016491||GO:0016627||GO:0016634	coproporphyrinogen oxidase activity||molecular_function||catalytic activity||oxidoreductase activity||oxidoreductase activity, acting on the CH-CH group of donors||oxidoreductase activity, acting on the CH-CH group of donors, oxygen as acceptor	pti00860||pti01100||pti01110	Porphyrin and chlorophyll metabolism||Metabolic pathways||Biosynthesis of secondary metabolites
7195876	-0.446207	0.258771	0.470461	-1.60246	0.000680365	0.00421177	PHATRDRAFT_4593	NC_011690.1	21260	21897	-	546	protein_coding	predicted protein && Q6STH5.1 RecName: Full=Fe-S cluster assembly factor HCF101, chloroplastic; AltName: Full=Protein HIGH CHLOROPHYLL FLUORESCENCE 101; Flags: Precursor && PF10609:NUBPL iron-transfer P-loop NTPase	-	--	--	--	--	--	--	--	--
7203630	-0.465811	0.0422187	0.153937	-1.22781	7.32049e-06	8.24724e-05	PHATRDRAFT_48359	NC_011685.1	227960	228846	+	808	protein_coding	predicted protein && - && PF01789:PsbP	-	GO:0015979||GO:0008152||GO:0008150||GO:0009987||GO:0044237	photosynthesis||metabolic process||biological_process||cellular process||cellular metabolic process	GO:0009523||GO:0009654||GO:0019898||GO:0005622||GO:0005575||GO:0016020||GO:0005623||GO:0009521||GO:0009579||GO:0032991||GO:0034357||GO:0044424||GO:0044425||GO:0044436||GO:0044464||GO:0098796||GO:0042651||GO:1902494||GO:1990204	photosystem II||photosystem II oxygen evolving complex||extrinsic component of membrane||intracellular||cellular_component||membrane||cell||photosystem||thylakoid||protein-containing complex||photosynthetic membrane||intracellular part||membrane part||thylakoid part||cell part||membrane protein complex||thylakoid membrane||catalytic complex||oxidoreductase complex	GO:0005509||GO:0003674||GO:0005488||GO:0046872||GO:0043167||GO:0043169	calcium ion binding||molecular_function||binding||metal ion binding||ion binding||cation binding	pti00195	Photosynthesis
7197107	-0.512326	0.027849	0.11784	-1.21736	2.15245e-08	4.49674e-07	ME1	NC_011670.1	236007	237923	-	1917	protein_coding	predicted protein && Q6TU48.1 RecName: Full=NADP-dependent malic enzyme; Short=NADP-ME; AltName: Full=SrfA-induced gene A protein && PF03949:Malic enzyme, NAD binding domain|PF00390:Malic enzyme, N-terminal domain	Malic_M	GO:0055114||GO:0008152||GO:0008150	oxidation-reduction process||metabolic process||biological_process			GO:0004471||GO:0051287||GO:0003674||GO:0003824||GO:0004470||GO:0016491||GO:0016614||GO:0016615||GO:0016616||GO:0000166||GO:0005488||GO:0036094||GO:0048037||GO:0050662||GO:0097159||GO:1901265||GO:1901363	malate dehydrogenase (decarboxylating) (NAD+) activity||NAD binding||molecular_function||catalytic activity||malic enzyme activity||oxidoreductase activity||oxidoreductase activity, acting on CH-OH group of donors||malate dehydrogenase activity||oxidoreductase activity, acting on the CH-OH group of donors, NAD or NADP as acceptor||nucleotide binding||binding||small molecule binding||cofactor bind…	pti00620||pti00710||pti01100||pti01200	Pyruvate metabolism||Carbon fixation in photosynthetic organisms||Metabolic pathways||Carbon metabolism
7200644	-0.753752	0.000808137	0.00973022	-1.20145	2.45273e-06	3.13408e-05	PHATRDRAFT_56608	NC_011675.1	658813	660627	+	1618	protein_coding	predicted protein && Q9SDT1.1 RecName: Full=Protochlorophyllide reductase, chloroplastic; Short=PCR; AltName: Full=NADPH-protochlorophyllide oxidoreductase; Short=POR; Flags: Precursor && PF00106:short chain dehydrogenase	adh_short	GO:0008152||GO:0008150	metabolic process||biological_process			GO:0016491||GO:0003674||GO:0003824	oxidoreductase activity||molecular_function||catalytic activity	pti00860||pti01100||pti01110	Porphyrin and chlorophyll metabolism||Metabolic pathways||Biosynthesis of secondary metabolites
7201470	-0.890638	0.000243385	0.00389416	-2.01079	4.04913e-13	1.94485e-11	AtpC	NC_011677.1	763248	764790	+	1225	protein_coding	precursor of ATPase ATPase gamma subunit && Q41075.1 RecName: Full=ATP synthase gamma chain, chloroplastic; AltName: Full=F-ATPase gamma subunit; Flags: Precursor && PF00231:ATP synthase	-	GO:0015986||GO:0008152||GO:0006139||GO:0006163||GO:0006164||GO:0006725||GO:0006753||GO:0006754||GO:0006793||GO:0006796||GO:0006807||GO:0006810||GO:0006811||GO:0006812||GO:0008150||GO:0009058||GO:0009117||GO:0009123||GO:0009124||GO:0009126||GO:0009127||GO:0009141||GO:0009142||GO:0009144||GO:0009145||GO:0009150||GO:0009152||GO:0009156||GO:0009161||GO:0009165||GO:0009167||GO:0009168||GO:0009199||GO:…	ATP synthesis coupled proton transport||metabolic process||nucleobase-containing compound metabolic process||purine nucleotide metabolic process||purine nucleotide biosynthetic process||cellular aromatic compound metabolic process||nucleoside phosphate metabolic process||ATP biosynthetic process||phosphorus metabolic process||phosphate-containing compound metabolic process||nitrogen compound meta…	GO:0045261||GO:0016469||GO:0005622||GO:0005575||GO:0016020||GO:0005623||GO:0032991||GO:0033178||GO:0044424||GO:0044425||GO:0044464||GO:0045259||GO:0098796	proton-transporting ATP synthase complex, catalytic core F(1)||proton-transporting two-sector ATPase complex||intracellular||cellular_component||membrane||cell||protein-containing complex||proton-transporting two-sector ATPase complex, catalytic domain||intracellular part||membrane part||cell part||proton-transporting ATP synthase complex||membrane protein complex	GO:0046933||GO:0046961||GO:0003674||GO:0042623||GO:0003824||GO:0019829||GO:0042626||GO:0017111||GO:0005215||GO:0022857||GO:0016887||GO:0008324||GO:0015075||GO:0015077||GO:0015078||GO:0015318||GO:0015399||GO:0015405||GO:0016462||GO:0016787||GO:0016817||GO:0016818||GO:0022804||GO:0022853||GO:0022890||GO:0042625||GO:0043492||GO:0044769||GO:0036442	proton-transporting ATP synthase activity, rotational mechanism||proton-transporting ATPase activity, rotational mechanism||molecular_function||ATPase activity, coupled||catalytic activity||cation-transporting ATPase activity||ATPase activity, coupled to transmembrane movement of substances||nucleoside-triphosphatase activity||transporter activity||transmembrane transporter activity||ATPase activ…	pti00190||pti00195||pti01100	Oxidative phosphorylation||Photosynthesis||Metabolic pathways
7197242	-0.934473	2.06106e-05	0.000547174	-1.2932	1.77938e-07	2.9139e-06	HemA	NC_011670.1	1232245	1234274	+	1763	protein_coding	glutamyl-trna reductase && Q117I4.1 RecName: Full=Glutamyl-tRNA reductase; Short=GluTR && PF00745:Glutamyl-tRNAGlu reductase, dimerisation domain|PF01488:Shikimate / quinate 5-dehydrogenase|PF05201:Glutamyl-tRNAGlu reductase, N-terminal domain	-	GO:0033014||GO:0055114||GO:0008152||GO:0006725||GO:0006807||GO:0008150||GO:0009058||GO:0009987||GO:0018130||GO:0019438||GO:0033013||GO:0034641||GO:0044237||GO:0044249||GO:0044271||GO:0046483||GO:0071704||GO:1901360||GO:1901362||GO:1901564||GO:1901566||GO:1901576	tetrapyrrole biosynthetic process||oxidation-reduction process||metabolic process||cellular aromatic compound metabolic process||nitrogen compound metabolic process||biological_process||biosynthetic process||cellular process||heterocycle biosynthetic process||aromatic compound biosynthetic process||tetrapyrrole metabolic process||cellular nitrogen compound metabolic process||cellular metabolic pr…			GO:0008883||GO:0050661||GO:0003674||GO:0003824||GO:0016491||GO:0016620||GO:0016903||GO:0140098||GO:0140101||GO:0000166||GO:0005488||GO:0036094||GO:0048037||GO:0050662||GO:0097159||GO:1901265||GO:1901363	glutamyl-tRNA reductase activity||NADP binding||molecular_function||catalytic activity||oxidoreductase activity||oxidoreductase activity, acting on the aldehyde or oxo group of donors, NAD or NADP as acceptor||oxidoreductase activity, acting on the aldehyde or oxo group of donors||catalytic activity, acting on RNA||catalytic activity, acting on a tRNA||nucleotide binding||binding||small molecule …	pti00860||pti01100||pti01110	Porphyrin and chlorophyll metabolism||Metabolic pathways||Biosynthesis of secondary metabolites
7201329	-0.945435	0.000545394	0.0073301	-1.32501	1.6886e-05	0.000171393	PHATRDRAFT_46085	NC_011677.1	220747	222271	+	1360	protein_coding	predicted protein && Q38833.1 RecName: Full=Chlorophyll synthase, chloroplastic; AltName: Full=Polyprenyl transferase; AltName: Full=Protein G4; Short=AtG4; Flags: Precursor && PF01040:UbiA prenyltransferase family	UbiA			GO:0016021||GO:0005575||GO:0016020||GO:0031224||GO:0044425	integral component of membrane||cellular_component||membrane||intrinsic component of membrane||membrane part	GO:0004659||GO:0003674||GO:0003824||GO:0016740||GO:0016765	prenyltransferase activity||molecular_function||catalytic activity||transferase activity||transferase activity, transferring alkyl or aryl (other than methyl) groups	pti00860||pti01100||pti01110	Porphyrin and chlorophyll metabolism||Metabolic pathways||Biosynthesis of secondary metabolites
7201653	-1.00983	3.29143e-05	0.000795268	-0.93546	0.000362592	0.00249257	PHATRDRAFT_50966	NC_011678.1	226422	228121	-	1595	protein_coding	predicted protein && Q85WB7.1 RecName: Full=Glutamate-1-semialdehyde 2,1-aminomutase, chloroplastic; Short=GSA; AltName: Full=Glutamate-1-semialdehyde aminotransferase; Short=GSA-AT; Flags: Precursor && PF00202:Aminotransferase class-III	Aminotran_3					GO:0008483||GO:0030170||GO:0003674||GO:0003824||GO:0016740||GO:0016769||GO:0005488||GO:0008144||GO:0019842||GO:0036094||GO:0043167||GO:0043168||GO:0048037||GO:0050662||GO:0070279||GO:0097159||GO:1901363	transaminase activity||pyridoxal phosphate binding||molecular_function||catalytic activity||transferase activity||transferase activity, transferring nitrogenous groups||binding||drug binding||vitamin binding||small molecule binding||ion binding||anion binding||cofactor binding||coenzyme binding||vitamin B6 binding||organic cyclic compound binding||heterocyclic compound binding	pti00860||pti01100||pti01110	Porphyrin and chlorophyll metabolism||Metabolic pathways||Biosynthesis of secondary metabolites
7198811	-1.14576	4.93938e-06	0.000171871	-2.40111	9.64404e-20	1.20651e-17	PHATRDRAFT_23717	NC_011694.1	300193	301801	+	1260	protein_coding	predicted protein && O23877.1 RecName: Full=Ferredoxin--NADP reductase, embryo isozyme, chloroplastic; Short=FNR; Flags: Precursor && PF00175:Oxidoreductase NAD-binding domain	NAD_binding_1	GO:0055114||GO:0008152||GO:0008150	oxidation-reduction process||metabolic process||biological_process			GO:0016491||GO:0003674||GO:0003824	oxidoreductase activity||molecular_function||catalytic activity	pti00195||pti01100	Photosynthesis||Metabolic pathways
7200476	-1.25803	0.000129011	0.00233522	-1.42401	2.45555e-09	6.26049e-08	Lhcx1	NC_011675.1	996379	997300	+	837	protein_coding	protein fucoxanthin chlorophyll a/c protein && Q03965.1 RecName: Full=Chlorophyll a-b binding protein L1818, chloroplastic; Flags: Precursor && PF00504:Chlorophyll A-B binding protein	-	--	--	--	--	--	--	--	--
7197023	-1.4849	2.58209e-08	2.18603e-06	-1.33626	9.75812e-09	2.19639e-07	PHATRDRAFT_50740	NC_011670.1	1322340	1325201	-	2594	protein_coding	predicted protein && P72772.1 RecName: Full=Magnesium-chelatase subunit ChlD; Short=Mg-chelatase subunit D; AltName: Full=Mg-protoporphyrin IX chelatase && PF01078:Magnesium chelatase, subunit ChlI|PF13519:von Willebrand factor type A domain	-	--	--	--	--	--	--	pti00860||pti01100||pti01110	Porphyrin and chlorophyll metabolism||Metabolic pathways||Biosynthesis of secondary metabolites
7199081	-1.5457	0.00131893	0.0139853	-1.0833	0.00120175	0.00677655	PHATRDRAFT_16719	NC_011696.1	376157	376794	-	546	protein_coding	predicted protein && Q6STH5.1 RecName: Full=Fe-S cluster assembly factor HCF101, chloroplastic; AltName: Full=Protein HIGH CHLOROPHYLL FLUORESCENCE 101; Flags: Precursor && PF10609:NUBPL iron-transfer P-loop NTPase	-	--	--	--	--	--	--	--	--
7198755	-1.56401	3.57161e-11	6.4837e-09	-1.21293	7.23475e-06	8.19018e-05	GluRS_2	NC_011694.1	297053	299067	+	1765	protein_coding	glutamyl-trna synthase && Q9FEA2.1 RecName: Full=Glutamate--tRNA ligase, chloroplastic/mitochondrial; AltName: Full=AtERS; AltName: Full=Glutamyl-tRNA synthetase; Short=GluRS; AltName: Full=Protein OVULE ABORTION 3; Flags: Precursor && PF00749:tRNA synthetases class I (E and Q), catalytic domain	-	GO:0043039||GO:0008152||GO:0006082||GO:0006139||GO:0006399||GO:0006520||GO:0006725||GO:0006807||GO:0008150||GO:0009987||GO:0016070||GO:0019752||GO:0034641||GO:0034660||GO:0043038||GO:0043170||GO:0043436||GO:0044237||GO:0044238||GO:0044281||GO:0046483||GO:0071704||GO:0090304||GO:1901360||GO:1901564	tRNA aminoacylation||metabolic process||organic acid metabolic process||nucleobase-containing compound metabolic process||tRNA metabolic process||cellular amino acid metabolic process||cellular aromatic compound metabolic process||nitrogen compound metabolic process||biological_process||cellular process||RNA metabolic process||carboxylic acid metabolic process||cellular nitrogen compound metaboli…			GO:0005524||GO:0000049||GO:0000166||GO:0003674||GO:0005488||GO:0008144||GO:0017076||GO:0030554||GO:0032553||GO:0032555||GO:0032559||GO:0035639||GO:0036094||GO:0043167||GO:0043168||GO:0097159||GO:0097367||GO:1901265||GO:1901363||GO:0003676||GO:0003723	ATP binding||tRNA binding||nucleotide binding||molecular_function||binding||drug binding||purine nucleotide binding||adenyl nucleotide binding||ribonucleotide binding||purine ribonucleotide binding||adenyl ribonucleotide binding||purine ribonucleoside triphosphate binding||small molecule binding||ion binding||anion binding||organic cyclic compound binding||carbohydrate derivative binding||nucleos…	pti00860||pti00970||pti01100||pti01110	Porphyrin and chlorophyll metabolism||Aminoacyl-tRNA biosynthesis||Metabolic pathways||Biosynthesis of secondary metabolites
7198277	-1.7455	1.1797e-09	1.47489e-07	-1.68818	3.57065e-11	1.21572e-09	hemE	NC_011691.1	201081	202181	+	1101	protein_coding	uroporphyrinogen decarboxylase && Q2S1W0.1 RecName: Full=Uroporphyrinogen decarboxylase; Short=UPD; Short=URO-D && PF01208:Uroporphyrinogen decarboxylase (URO-D)	-	GO:0006779||GO:0008152||GO:0006725||GO:0006778||GO:0006807||GO:0008150||GO:0009058||GO:0009987||GO:0018130||GO:0019438||GO:0033013||GO:0033014||GO:0034641||GO:0044237||GO:0044249||GO:0044271||GO:0046483||GO:0051186||GO:0051188||GO:0071704||GO:1901360||GO:1901362||GO:1901564||GO:1901566||GO:1901576	porphyrin-containing compound biosynthetic process||metabolic process||cellular aromatic compound metabolic process||porphyrin-containing compound metabolic process||nitrogen compound metabolic process||biological_process||biosynthetic process||cellular process||heterocycle biosynthetic process||aromatic compound biosynthetic process||tetrapyrrole metabolic process||tetrapyrrole biosynthetic proc…			GO:0004853||GO:0003674||GO:0003824||GO:0016829||GO:0016830||GO:0016831	uroporphyrinogen decarboxylase activity||molecular_function||catalytic activity||lyase activity||carbon-carbon lyase activity||carboxy-lyase activity	pti00860||pti01100||pti01110	Porphyrin and chlorophyll metabolism||Metabolic pathways||Biosynthesis of secondary metabolites
7204596	-1.76877	1.57256e-09	1.87869e-07	-1.33019	6.84092e-08	1.25815e-06	CHLH	NC_011679.1	162586	166617	-	4032	protein_coding	protoporphyrin IX magnesium chelatase%2C subunit H && Q9FNB0.1 RecName: Full=Magnesium-chelatase subunit ChlH, chloroplastic; Short=Mg-chelatase subunit H; AltName: Full=ABA-binding protein; AltName: Full=Mg-protoporphyrin IX chelatase subunit ChlH; AltName: Full=Protein CONDITIONAL CHLORINA; AltName: Full=Protein GENOMES UNCOUPLED 5; AltName: Full=Protein RAPID TRANSPIRATION IN DETACHED LEAVES 1…	-	GO:0009058||GO:0008152||GO:0008150	biosynthetic process||metabolic process||biological_process			GO:0016851||GO:0003674||GO:0003824||GO:0016874||GO:0051002||GO:0051003	magnesium chelatase activity||molecular_function||catalytic activity||ligase activity||ligase activity, forming nitrogen-metal bonds||ligase activity, forming nitrogen-metal bonds, forming coordination complexes	pti00860||pti01100||pti01110	Porphyrin and chlorophyll metabolism||Metabolic pathways||Biosynthesis of secondary metabolites

## Sheet: Table S7
Table S7 DEGs inovled in nitrogen metabolism
gene_id	48-log2FoldChange	pvalue	padj	72-log2FoldChange	pvalue	padj	gene_name	gene_chr	gene_start	gene_end	gene_strand	gene_length	gene_biotype	gene_description	tf_family	biological_process	biological_process_description	cellular_component	cellular_component_description	molecular_function	molecular_function_description	pathway_id	pathway
7201664	3.27904	6.17845e-10	8.30383e-08	9.036	4.63675e-05	0.000413655	PHATRDRAFT_8155	NC_011678.1	283257	283562	+	306	protein_coding	predicted protein && P22944.2 RecName: Full=Nitrite reductase [NAD(P)H] && PF13806:Rieske-like [2Fe-2S] domain	-	GO:0042128||GO:0055114||GO:0008152||GO:0006082||GO:0006807||GO:0008150||GO:0009987||GO:0042126||GO:0043436||GO:0044237||GO:0044281||GO:0071704||GO:0071941||GO:2001057	nitrate assimilation||oxidation-reduction process||metabolic process||organic acid metabolic process||nitrogen compound metabolic process||biological_process||cellular process||nitrate metabolic process||oxoacid metabolic process||cellular metabolic process||small molecule metabolic process||organic substance metabolic process||nitrogen cycle metabolic process||reactive nitrogen species metabolic…			GO:0008942||GO:0016491||GO:0051537||GO:0003674||GO:0003824||GO:0016661||GO:0046857||GO:0098809||GO:0005488||GO:0048037||GO:0051536||GO:0051540	nitrite reductase [NAD(P)H] activity||oxidoreductase activity||2 iron, 2 sulfur cluster binding||molecular_function||catalytic activity||oxidoreductase activity, acting on other nitrogenous compounds as donors||oxidoreductase activity, acting on other nitrogenous compounds as donors, with NAD or NADP as acceptor||nitrite reductase activity||binding||cofactor binding||iron-sulfur cluster binding||…	--	--
7201783	2.99588	3.0952e-08	2.57982e-06	6.87742	NA	1	PHATRDRAFT_13154	NC_011678.1	280524	283178	+	2655	protein_coding	predicted protein && P08201.4 RecName: Full=Nitrite reductase (NADH) large subunit && PF01077:Nitrite and sulphite reductase 4Fe-4S domain|PF04324:BFD-like [2Fe-2S] binding domain|PF03460:Nitrite/Sulfite reductase ferredoxin-like half domain|PF07992:Pyridine nucleotide-disulphide oxidoreductase	Pyr_redox_2	GO:0055114||GO:0008152||GO:0008150	oxidation-reduction process||metabolic process||biological_process			GO:0016491||GO:0020037||GO:0051536||GO:0003674||GO:0003824||GO:0005488||GO:0046906||GO:0048037||GO:0097159||GO:1901363||GO:0051540	oxidoreductase activity||heme binding||iron-sulfur cluster binding||molecular_function||catalytic activity||binding||tetrapyrrole binding||cofactor binding||organic cyclic compound binding||heterocyclic compound binding||metal cluster binding	--	--
7202332	2.71848	1.1623e-13	3.47139e-11	1.99808	5.12422e-21	7.55225e-19	PHATRDRAFT_13951	NC_011681.1	236291	237707	+	1353	protein_coding	predicted protein && P15111.2 RecName: Full=NADP-specific glutamate dehydrogenase; Short=NADP-GDH && PF02812:Glu/Leu/Phe/Val dehydrogenase, dimerisation domain|PF00208:Glutamate/Leucine/Phenylalanine/Valine dehydrogenase	-	GO:0006520||GO:0055114||GO:0008152||GO:0006082||GO:0006807||GO:0008150||GO:0009987||GO:0019752||GO:0043436||GO:0044237||GO:0044238||GO:0044281||GO:0071704||GO:1901564	cellular amino acid metabolic process||oxidation-reduction process||metabolic process||organic acid metabolic process||nitrogen compound metabolic process||biological_process||cellular process||carboxylic acid metabolic process||oxoacid metabolic process||cellular metabolic process||primary metabolic process||small molecule metabolic process||organic substance metabolic process||organonitrogen co…			GO:0016491||GO:0003674||GO:0003824	oxidoreductase activity||molecular_function||catalytic activity	pti00220||pti00250||pti00910||pti01100	Arginine biosynthesis||Alanine, aspartate and glutamate metabolism||Nitrogen metabolism||Metabolic pathways
7201669	2.22394	4.471e-05	0.00102938	4.26993	0.00789582	0.0320208	PHATRDRAFT_46427	NC_011678.1	303583	304758	-	1099	protein_coding	predicted protein && Q50568.1 RecName: Full=Probable formate transporter [Methanothermobacter thermautotrophicus] && PF01226:Formate/nitrite transporter	-	GO:0006810||GO:0008150||GO:0051179||GO:0051234	transport||biological_process||localization||establishment of localization	GO:0016020||GO:0005575	membrane||cellular_component	GO:0005215||GO:0003674	transporter activity||molecular_function	--	--
7203160	2.13958	6.93646e-05	0.00145099	4.14758	5.42855e-18	5.12331e-16	PHATRDRAFT_51092	NC_011683.1	372220	373582	+	1251	protein_coding	predicted protein && O22506.1 RecName: Full=Glutamine synthetase, chloroplastic; AltName: Full=GS2; AltName: Full=Glutamate--ammonia ligase; Flags: Precursor && PF00120:Glutamine synthetase, catalytic domain|PF03951:Glutamine synthetase, beta-Grasp domain	-	GO:0006807||GO:0006542||GO:0008152||GO:0008150||GO:0006082||GO:0006520||GO:0006541||GO:0008652||GO:0009058||GO:0009064||GO:0009084||GO:0009987||GO:0016053||GO:0019752||GO:0043436||GO:0044237||GO:0044238||GO:0044249||GO:0044281||GO:0044283||GO:0046394||GO:0071704||GO:1901564||GO:1901566||GO:1901576||GO:1901605||GO:1901607	nitrogen compound metabolic process||glutamine biosynthetic process||metabolic process||biological_process||organic acid metabolic process||cellular amino acid metabolic process||glutamine metabolic process||cellular amino acid biosynthetic process||biosynthetic process||glutamine family amino acid metabolic process||glutamine family amino acid biosynthetic process||cellular process||organic acid…			GO:0004356||GO:0003674||GO:0003824||GO:0016211||GO:0016874||GO:0016879||GO:0016880	glutamate-ammonia ligase activity||molecular_function||catalytic activity||ammonia ligase activity||ligase activity||ligase activity, forming carbon-nitrogen bonds||acid-ammonia (or amide) ligase activity	pti00220||pti00250||pti00630||pti00910||pti01100||pti01230	Arginine biosynthesis||Alanine, aspartate and glutamate metabolism||Glyoxylate and dicarboxylate metabolism||Nitrogen metabolism||Metabolic pathways||Biosynthesis of amino acids
7195404	2.06644	1.31188e-07	8.4972e-06	2.25179	1.19001e-12	5.3347e-11	PHATRDRAFT_54981	NC_011688.1	321187	323255	-	1820	protein_coding	predicted protein && Q9FVN0.1 RecName: Full=Ammonium transporter 1 member 3; AltName: Full=LeAMT1;3 && PF00909:Ammonium Transporter Family	Ammonium_transp	GO:0015696||GO:0006810||GO:0006811||GO:0006812||GO:0008150||GO:0051179||GO:0051234||GO:0071705	ammonium transport||transport||ion transport||cation transport||biological_process||localization||establishment of localization||nitrogen compound transport	GO:0016020||GO:0005575	membrane||cellular_component	GO:0008519||GO:0003674||GO:0005215||GO:0022857||GO:0008324||GO:0015075	ammonium transmembrane transporter activity||molecular_function||transporter activity||transmembrane transporter activity||cation transmembrane transporter activity||ion transmembrane transporter activity	--	--
7198046	1.95608	0.0252514	0.110619	5.51732	5.22514e-06	6.16418e-05	PHATRDRAFT_26029	NC_011672.1	356038	357711	-	1585	protein_coding	predicted protein && Q9FJH8.1 RecName: Full=High affinity nitrate transporter 2.4; Short=AtNRT2:4 && PF07690:Major Facilitator Superfamily	MFS_1	GO:0055085||GO:0006810||GO:0008150||GO:0051179||GO:0051234	transmembrane transport||transport||biological_process||localization||establishment of localization	GO:0016021||GO:0005575||GO:0016020||GO:0031224||GO:0044425	integral component of membrane||cellular_component||membrane||intrinsic component of membrane||membrane part			pti00910	Nitrogen metabolism
7195287	1.51995	0.0691959	0.210901	5.03722	4.07898e-07	6.1898e-06	PHATRDRAFT_54983	NC_011688.1	363350	366343	+	2851	protein_coding	predicted protein && P39869.1 RecName: Full=Nitrate reductase [NADH]; Short=NR && PF00970:Oxidoreductase FAD-binding domain|PF00174:Oxidoreductase molybdopterin binding domain|PF00175:Oxidoreductase NAD-binding domain|PF00173:Cytochrome b5-like Heme/Steroid binding domain|PF03404:Mo-co oxidoreductase dimerisation domain	FAD_binding_6	GO:0042128||GO:0055114||GO:0008152||GO:0006082||GO:0006807||GO:0008150||GO:0009987||GO:0042126||GO:0043436||GO:0044237||GO:0044281||GO:0071704||GO:0071941||GO:2001057	nitrate assimilation||oxidation-reduction process||metabolic process||organic acid metabolic process||nitrogen compound metabolic process||biological_process||cellular process||nitrate metabolic process||oxoacid metabolic process||cellular metabolic process||small molecule metabolic process||organic substance metabolic process||nitrogen cycle metabolic process||reactive nitrogen species metabolic…			GO:0016491||GO:0030151||GO:0003674||GO:0003824||GO:0005488||GO:0046872||GO:0043167||GO:0043169||GO:0046914	oxidoreductase activity||molybdenum ion binding||molecular_function||catalytic activity||binding||metal ion binding||ion binding||cation binding||transition metal ion binding	pti00910||pti01100	Nitrogen metabolism||Metabolic pathways
7205138	1.36033	6.47235e-06	0.000214839	1.88142	8.8606e-33	3.81325e-30	PHATRDRAFT_bd972	NW_002238046.1	1977	4054	+	1832	protein_coding	Ammonium_transporter && Q9FVN0.1 RecName: Full=Ammonium transporter 1 member 3; AltName: Full=LeAMT1;3 && PF00909:Ammonium Transporter Family	Ammonium_transp	GO:0015696||GO:0006810||GO:0006811||GO:0006812||GO:0008150||GO:0051179||GO:0051234||GO:0071705	ammonium transport||transport||ion transport||cation transport||biological_process||localization||establishment of localization||nitrogen compound transport	GO:0016020||GO:0005575	membrane||cellular_component	GO:0008519||GO:0003674||GO:0005215||GO:0022857||GO:0008324||GO:0015075	ammonium transmembrane transporter activity||molecular_function||transporter activity||transmembrane transporter activity||cation transmembrane transporter activity||ion transmembrane transporter activity	--	--
7197550	1.12755	0.0137047	0.0730193	1.54784	8.77279e-06	9.68066e-05	cc1	NC_011670.1	651681	652738	-	948	protein_coding	predicted protein && Q95M77.2 RecName: Full=Ammonium transporter Rh type B; AltName: Full=Rhesus blood group family type B glycoprotein; Short=Rh family type B glycoprotein; Short=Rh type B glycoprotein && PF00909:Ammonium Transporter Family	Ammonium_transp	GO:0015696||GO:0006810||GO:0006811||GO:0006812||GO:0008150||GO:0051179||GO:0051234||GO:0071705	ammonium transport||transport||ion transport||cation transport||biological_process||localization||establishment of localization||nitrogen compound transport	GO:0016020||GO:0005575	membrane||cellular_component	GO:0008519||GO:0003674||GO:0005215||GO:0022857||GO:0008324||GO:0015075	ammonium transmembrane transporter activity||molecular_function||transporter activity||transmembrane transporter activity||cation transmembrane transporter activity||ion transmembrane transporter activity	--	--
7201627	0.988521	0.000532598	0.0072005	2.11352	1.74533e-20	2.40744e-18	PHATRDRAFT_27877	NC_011678.1	106019	108553	-	1813	protein_coding	predicted protein && Q9FVN0.1 RecName: Full=Ammonium transporter 1 member 3; AltName: Full=LeAMT1;3 && PF00909:Ammonium Transporter Family	Ammonium_transp	GO:0015696||GO:0006810||GO:0006811||GO:0006812||GO:0008150||GO:0051179||GO:0051234||GO:0071705	ammonium transport||transport||ion transport||cation transport||biological_process||localization||establishment of localization||nitrogen compound transport	GO:0016020||GO:0005575	membrane||cellular_component	GO:0008519||GO:0003674||GO:0005215||GO:0022857||GO:0008324||GO:0015075	ammonium transmembrane transporter activity||molecular_function||transporter activity||transmembrane transporter activity||cation transmembrane transporter activity||ion transmembrane transporter activity	--	--
7203740	0.418154	0.0557169	0.184556	1.14294	6.318e-13	2.95545e-11	GLNA	NC_011685.1	107753	110638	-	2605	protein_coding	GLNA%2C glutamine synthase && Q54WR9.1 RecName: Full=Type-3 glutamine synthetase; AltName: Full=Type-3 glutamate--ammonia ligase; Short=Type-3 GS && PF12437:Glutamine synthetase type III N terminal|PF00120:Glutamine synthetase, catalytic domain	-	GO:0006807||GO:0008152||GO:0008150	nitrogen compound metabolic process||metabolic process||biological_process			GO:0004356||GO:0003674||GO:0003824||GO:0016211||GO:0016874||GO:0016879||GO:0016880	glutamate-ammonia ligase activity||molecular_function||catalytic activity||ammonia ligase activity||ligase activity||ligase activity, forming carbon-nitrogen bonds||acid-ammonia (or amide) ligase activity	pti00220||pti00250||pti00630||pti00910||pti01100||pti01230	Arginine biosynthesis||Alanine, aspartate and glutamate metabolism||Glyoxylate and dicarboxylate metabolism||Nitrogen metabolism||Metabolic pathways||Biosynthesis of amino acids
7201610	-0.934015	0.00188911	0.018266	-1.2872	1.59762e-06	2.12469e-05	PHATRDRAFT_54560	NC_011678.1	32419	34093	-	1675	protein_coding	predicted protein && Q94JG1.1 RecName: Full=High-affinity nitrate transporter 2.3; Short=OsNRT2.3 && PF07690:Major Facilitator Superfamily	MFS_1	GO:0055085||GO:0006810||GO:0008150||GO:0051179||GO:0051234	transmembrane transport||transport||biological_process||localization||establishment of localization	GO:0016021||GO:0005575||GO:0016020||GO:0031224||GO:0044425	integral component of membrane||cellular_component||membrane||intrinsic component of membrane||membrane part			--	--
7199619	-0.979615	0.0151175	0.0774748	-1.01232	0.0091765	0.0360328	PHATRDRAFT_11128	NC_011673.1	704124	705532	-	1323	protein_coding	predicted protein && Q9FVN0.1 RecName: Full=Ammonium transporter 1 member 3; AltName: Full=LeAMT1;3 && PF00909:Ammonium Transporter Family	Ammonium_transp	GO:0015696||GO:0006810||GO:0006811||GO:0006812||GO:0008150||GO:0051179||GO:0051234||GO:0071705	ammonium transport||transport||ion transport||cation transport||biological_process||localization||establishment of localization||nitrogen compound transport	GO:0016020||GO:0005575	membrane||cellular_component	GO:0008519||GO:0003674||GO:0005215||GO:0022857||GO:0008324||GO:0015075	ammonium transmembrane transporter activity||molecular_function||transporter activity||transmembrane transporter activity||cation transmembrane transporter activity||ion transmembrane transporter activity	--	--

## Sheet: Table S8
Table S8 DEGs inovled in oxidation-reduction process
gene_id	48-log2FoldChange	pvalue	padj	72-log2FoldChange	pvalue	padj	gene_name	gene_chr	gene_start	gene_end	gene_strand	gene_length	gene_biotype	gene_description	tf_family	biological_process	biological_process_description	cellular_component	cellular_component_description	molecular_function	molecular_function_description	pathway_id	pathway
7199287	3.73367	1.23263e-34	2.20888e-31	3.38595	6.00833e-51	1.61609e-47	PHATRDRAFT_50508	NC_011698.1	255138	256321	-	1184	protein_coding	predicted protein && - && PF13905:Thioredoxin-like|PF14340:Domain of unknown function (DUF4395)	-	--	--	--	--	--	--	--	--
7202565	1.46942	0.000970605	0.0111021	2.58978	4.62497e-27	1.21366e-24	PHATRDRAFT_37658	NC_011681.1	630303	630980	+	678	protein_coding	predicted protein && P46436.3 RecName: Full=Glutathione S-transferase 1; AltName: Full=GST class-sigma && PF00043:Glutathione S-transferase, C-terminal domain	GST_C	--	--	--	--	--	--	--	--
7197208	1.21992	0.00166544	0.016661	0.56989	0.00385436	0.0178208	PHATRDRAFT_7528	NC_011670.1	722199	722534	+	336	protein_coding	predicted protein && Q7Y0E8.1 RecName: Full=Probable nucleoredoxin 1-1; Short=OsNrx1-1 && PF13905:Thioredoxin-like	-	--	--	--	--	--	--	--	--
7195655	1.01251	0.00427583	0.0329561	0.638534	0.00174157	0.00916264	PHATRDRAFT_49158	NC_011689.1	95076	96559	-	1484	protein_coding	predicted protein && - && PF00085:Thioredoxin	-	GO:0045454||GO:0008150||GO:0009987||GO:0019725||GO:0042592||GO:0050789||GO:0050794||GO:0065007||GO:0065008	cell redox homeostasis||biological_process||cellular process||cellular homeostasis||homeostatic process||regulation of biological process||regulation of cellular process||biological regulation||regulation of biological quality					--	--
7198050	0.819886	0.0261678	0.112856	1.45719	8.22889e-08	1.46097e-06	PHATRDRAFT_44374	NC_011672.1	371663	372426	-	764	protein_coding	predicted protein && - && PF00085:Thioredoxin	-	GO:0045454||GO:0008150||GO:0009987||GO:0019725||GO:0042592||GO:0050789||GO:0050794||GO:0065007||GO:0065008	cell redox homeostasis||biological_process||cellular process||cellular homeostasis||homeostatic process||regulation of biological process||regulation of cellular process||biological regulation||regulation of biological quality					--	--
7199803	0.0573153	0.878653	0.936951	1.17024	0.0256604	0.0802093	PHATRDRAFT_44877	NC_011673.1	503643	505104	-	1462	protein_coding	predicted protein && A5PKL6.1 RecName: Full=Glutathione S-transferase C-terminal domain-containing protein && PF13679:Methyltransferase domain|PF01424:R3H domain	R3H					GO:0003676||GO:0003674||GO:0005488||GO:0097159||GO:1901363	nucleic acid binding||molecular_function||binding||organic cyclic compound binding||heterocyclic compound binding	--	--
7198761	-0.0783885	0.781993	0.885238	1.23617	5.42133e-05	0.000472675	PHATRDRAFT_50084	NC_011694.1	352627	353976	+	926	protein_coding	predicted protein && P30041.3 RecName: Full=Peroxiredoxin-6; AltName: Full=1-Cys peroxiredoxin; Short=1-Cys PRX; AltName: Full=24 kDa protein; AltName: Full=Acidic calcium-independent phospholipase A2; Short=aiPLA2; AltName: Full=Antioxidant protein 2; AltName: Full=Liver 2D page spot 40; AltName: Full=Non-selenium glutathione peroxidase; Short=NSGPx; AltName: Full=Red blood cells page spot 12 &&…	-	GO:0055114||GO:0008152||GO:0008150	oxidation-reduction process||metabolic process||biological_process			GO:0016209||GO:0016491||GO:0003674||GO:0003824	antioxidant activity||oxidoreductase activity||molecular_function||catalytic activity	pti00480||pti01100||pti01110	Glutathione metabolism||Metabolic pathways||Biosynthesis of secondary metabolites
7203294	-0.512917	0.267625	0.479743	-1.32264	0.00121111	0.00681501	PHATRDRAFT_38534	NC_011684.1	335402	336016	+	615	protein_coding	predicted protein && Q9M7T0.2 RecName: Full=Peroxiredoxin-2F, mitochondrial; AltName: Full=Peroxiredoxin IIF; AltName: Full=Thioredoxin reductase 2F; Flags: Precursor && PF08534:Redoxin	-					GO:0016491||GO:0003674||GO:0003824	oxidoreductase activity||molecular_function||catalytic activity	--	--
7197310	-0.547771	0.0124471	0.0687727	-1.25799	7.84041e-07	1.12324e-05	PHATRDRAFT_32813	NC_011670.1	856511	857400	+	801	protein_coding	predicted protein && - && PF14497:Glutathione S-transferase, C-terminal domain	-	--	--	--	--	--	--	--	--
7203681	-0.672198	0.00207534	0.0195302	-1.02487	3.29779e-05	0.000306663	PHATRDRAFT_56578	NC_011685.1	479355	480284	+	834	protein_coding	predicted protein && Q9FR35.1 RecName: Full=Peroxiredoxin-2C; AltName: Full=Peroxiredoxin IIC; AltName: Full=Thioredoxin reductase 2C && PF08534:Redoxin	-					GO:0016491||GO:0003674||GO:0003824	oxidoreductase activity||molecular_function||catalytic activity	pti04146	Peroxisome
7200687	-0.924272	0.000152046	0.0026539	-1.15604	1.26711e-08	2.75967e-07	PHATRDRAFT_45450	NC_011675.1	188016	189245	+	1230	protein_coding	predicted protein && O23166.2 RecName: Full=Thioredoxin-like protein HCF164, chloroplastic; AltName: Full=Protein HIGH CHLOROPHYLL FLUORESCENCE 164; Flags: Precursor && PF00085:Thioredoxin	-	GO:0045454||GO:0008150||GO:0009987||GO:0019725||GO:0042592||GO:0050789||GO:0050794||GO:0065007||GO:0065008	cell redox homeostasis||biological_process||cellular process||cellular homeostasis||homeostatic process||regulation of biological process||regulation of cellular process||biological regulation||regulation of biological quality					--	--
7205061	0.712278	0.0350241	0.136127	1.09996	0.00332212	0.0156973	PHATRDRAFT_bd420	NW_002238027.1	2893	3765	+	873	protein_coding	predicted protein && Q46845.2 RecName: Full=Disulfide-bond oxidoreductase YghU; AltName: Full=GSH-dependent disulfide-bond oxidoreductase YghU; AltName: Full=GST N2-2; AltName: Full=Organic hydroperoxidase && PF00043:Glutathione S-transferase, C-terminal domain	GST_C	--	--	--	--	--	--	--	--
7204592	0.54004	0.0139319	0.0737184	1.79868	3.41504e-09	8.52491e-08	PHATR_13244	NC_011679.1	150930	151824	-	762	protein_coding	predicted protein && Q4PBY6.1 RecName: Full=Cytochrome c peroxidase, mitochondrial; Short=CCP; Flags: Precursor && PF00141:Peroxidase	-	GO:0006979||GO:0055114||GO:0006950||GO:0008150||GO:0050896||GO:0008152	response to oxidative stress||oxidation-reduction process||response to stress||biological_process||response to stimulus||metabolic process			GO:0004601||GO:0020037||GO:0003674||GO:0003824||GO:0016491||GO:0016209||GO:0016684||GO:0005488||GO:0046906||GO:0048037||GO:0097159||GO:1901363	peroxidase activity||heme binding||molecular_function||catalytic activity||oxidoreductase activity||antioxidant activity||oxidoreductase activity, acting on peroxide as acceptor||binding||tetrapyrrole binding||cofactor binding||organic cyclic compound binding||heterocyclic compound binding	--	--
7204866	-0.888289	0.000443858	0.00631264	-1.22079	1.32782e-09	3.61672e-08	PHATRDRAFT_bd1645	NW_002238035.1	28866	30620	-	1755	protein_coding	peroxidase domain-containing protein && Q2FSF4.2 RecName: Full=Catalase-peroxidase; Short=CP; AltName: Full=Peroxidase/catalase && PF00141:Peroxidase	-	GO:0006979||GO:0055114||GO:0006950||GO:0008150||GO:0050896||GO:0008152	response to oxidative stress||oxidation-reduction process||response to stress||biological_process||response to stimulus||metabolic process			GO:0004601||GO:0020037||GO:0003674||GO:0003824||GO:0016491||GO:0016209||GO:0016684||GO:0005488||GO:0046906||GO:0048037||GO:0097159||GO:1901363	peroxidase activity||heme binding||molecular_function||catalytic activity||oxidoreductase activity||antioxidant activity||oxidoreductase activity, acting on peroxide as acceptor||binding||tetrapyrrole binding||cofactor binding||organic cyclic compound binding||heterocyclic compound binding	--	--
7199739	3.51696	7.59018e-06	0.000241449	2.3722	2.75229e-13	1.35214e-11	PHATRDRAFT_44774	NC_011673.1	206949	208643	-	1695	protein_coding	predicted protein && - && PF13434:L-lysine 6-monooxygenase (NADPH-requiring)	-	GO:0055114||GO:0008152||GO:0008150	oxidation-reduction process||metabolic process||biological_process			GO:0016491||GO:0003674||GO:0003824	oxidoreductase activity||molecular_function||catalytic activity	--	--
7201664	3.27904	6.17845e-10	8.30383e-08	9.036	4.63675e-05	0.000413655	PHATRDRAFT_8155	NC_011678.1	283257	283562	+	306	protein_coding	predicted protein && P22944.2 RecName: Full=Nitrite reductase [NAD(P)H] && PF13806:Rieske-like [2Fe-2S] domain	-	GO:0042128||GO:0055114||GO:0008152||GO:0006082||GO:0006807||GO:0008150||GO:0009987||GO:0042126||GO:0043436||GO:0044237||GO:0044281||GO:0071704||GO:0071941||GO:2001057	nitrate assimilation||oxidation-reduction process||metabolic process||organic acid metabolic process||nitrogen compound metabolic process||biological_process||cellular process||nitrate metabolic process||oxoacid metabolic process||cellular metabolic process||small molecule metabolic process||organic substance metabolic process||nitrogen cycle metabolic process||reactive nitrogen species metabolic…			GO:0008942||GO:0016491||GO:0051537||GO:0003674||GO:0003824||GO:0016661||GO:0046857||GO:0098809||GO:0005488||GO:0048037||GO:0051536||GO:0051540	nitrite reductase [NAD(P)H] activity||oxidoreductase activity||2 iron, 2 sulfur cluster binding||molecular_function||catalytic activity||oxidoreductase activity, acting on other nitrogenous compounds as donors||oxidoreductase activity, acting on other nitrogenous compounds as donors, with NAD or NADP as acceptor||nitrite reductase activity||binding||cofactor binding||iron-sulfur cluster binding||…	--	--
7201783	2.99588	3.0952e-08	2.57982e-06	6.87742	NA	1	PHATRDRAFT_13154	NC_011678.1	280524	283178	+	2655	protein_coding	predicted protein && P08201.4 RecName: Full=Nitrite reductase (NADH) large subunit && PF01077:Nitrite and sulphite reductase 4Fe-4S domain|PF04324:BFD-like [2Fe-2S] binding domain|PF03460:Nitrite/Sulfite reductase ferredoxin-like half domain|PF07992:Pyridine nucleotide-disulphide oxidoreductase	Pyr_redox_2	GO:0055114||GO:0008152||GO:0008150	oxidation-reduction process||metabolic process||biological_process			GO:0016491||GO:0020037||GO:0051536||GO:0003674||GO:0003824||GO:0005488||GO:0046906||GO:0048037||GO:0097159||GO:1901363||GO:0051540	oxidoreductase activity||heme binding||iron-sulfur cluster binding||molecular_function||catalytic activity||binding||tetrapyrrole binding||cofactor binding||organic cyclic compound binding||heterocyclic compound binding||metal cluster binding	--	--
7202332	2.71848	1.1623e-13	3.47139e-11	1.99808	5.12422e-21	7.55225e-19	PHATRDRAFT_13951	NC_011681.1	236291	237707	+	1353	protein_coding	predicted protein && P15111.2 RecName: Full=NADP-specific glutamate dehydrogenase; Short=NADP-GDH && PF02812:Glu/Leu/Phe/Val dehydrogenase, dimerisation domain|PF00208:Glutamate/Leucine/Phenylalanine/Valine dehydrogenase	-	GO:0006520||GO:0055114||GO:0008152||GO:0006082||GO:0006807||GO:0008150||GO:0009987||GO:0019752||GO:0043436||GO:0044237||GO:0044238||GO:0044281||GO:0071704||GO:1901564	cellular amino acid metabolic process||oxidation-reduction process||metabolic process||organic acid metabolic process||nitrogen compound metabolic process||biological_process||cellular process||carboxylic acid metabolic process||oxoacid metabolic process||cellular metabolic process||primary metabolic process||small molecule metabolic process||organic substance metabolic process||organonitrogen co…			GO:0016491||GO:0003674||GO:0003824	oxidoreductase activity||molecular_function||catalytic activity	pti00220||pti00250||pti00910||pti01100	Arginine biosynthesis||Alanine, aspartate and glutamate metabolism||Nitrogen metabolism||Metabolic pathways
7204914	2.1622	2.24346e-06	8.86825e-05	1.61379	7.17425e-08	1.30605e-06	PHATRDRAFT_bd1469	NW_002238036.1	275839	276780	-	942	protein_coding	2-hydroxyacid dehydrogenase && P44501.1 RecName: Full=2-hydroxyacid dehydrogenase homolog && PF02826:D-isomer specific 2-hydroxyacid dehydrogenase, NAD binding domain|PF00389:D-isomer specific 2-hydroxyacid dehydrogenase, catalytic domain	2-Hacid_dh_C	GO:0055114||GO:0008152||GO:0008150	oxidation-reduction process||metabolic process||biological_process			GO:0051287||GO:0016616||GO:0000166||GO:0003674||GO:0005488||GO:0036094||GO:0048037||GO:0050662||GO:0097159||GO:1901265||GO:1901363||GO:0003824||GO:0016491||GO:0016614	NAD binding||oxidoreductase activity, acting on the CH-OH group of donors, NAD or NADP as acceptor||nucleotide binding||molecular_function||binding||small molecule binding||cofactor binding||coenzyme binding||organic cyclic compound binding||nucleoside phosphate binding||heterocyclic compound binding||catalytic activity||oxidoreductase activity||oxidoreductase activity, acting on CH-OH group of d…	--	--
7200874	2.15491	0.288859	0.500453	4.15743	0.043648	0.121033	PHATRDRAFT_50914	NC_011676.1	13894	15200	+	1230	protein_coding	predicted protein && P77258.1 RecName: Full=N-ethylmaleimide reductase; AltName: Full=N-ethylmaleimide reducing enzyme && PF00724:NADH:flavin oxidoreductase / NADH oxidase family	Oxidored_FMN	GO:0055114||GO:0008152||GO:0008150	oxidation-reduction process||metabolic process||biological_process			GO:0010181||GO:0016491||GO:0000166||GO:0003674||GO:0005488||GO:0032553||GO:0036094||GO:0043167||GO:0043168||GO:0048037||GO:0050662||GO:0097159||GO:0097367||GO:1901265||GO:1901363||GO:0003824	FMN binding||oxidoreductase activity||nucleotide binding||molecular_function||binding||ribonucleotide binding||small molecule binding||ion binding||anion binding||cofactor binding||coenzyme binding||organic cyclic compound binding||carbohydrate derivative binding||nucleoside phosphate binding||heterocyclic compound binding||catalytic activity	--	--
7204421	2.06648	7.58535e-08	5.43718e-06	3.0936	1.91404e-28	6.05682e-26	PHATR_36913	NC_011679.1	645070	646355	-	1074	protein_coding	predicted protein && Q9A8H5.1 RecName: Full=N-acetyl-gamma-glutamyl-phosphate reductase; Short=AGPR; AltName: Full=N-acetyl-glutamate semialdehyde dehydrogenase; Short=NAGSA dehydrogenase >B8H555.1 RecName: Full=N-acetyl-gamma-glutamyl-phosphate reductase; Short=AGPR; AltName: Full=N-acetyl-glutamate semialdehyde dehydrogenase; Short=NAGSA dehydrogenase && PF01118:Semialdehyde dehydrogenase, NAD …	-	GO:0055114||GO:0008152||GO:0008150	oxidation-reduction process||metabolic process||biological_process			GO:0016620||GO:0051287||GO:0003674||GO:0003824||GO:0016491||GO:0016903||GO:0000166||GO:0005488||GO:0036094||GO:0048037||GO:0050662||GO:0097159||GO:1901265||GO:1901363	oxidoreductase activity, acting on the aldehyde or oxo group of donors, NAD or NADP as acceptor||NAD binding||molecular_function||catalytic activity||oxidoreductase activity||oxidoreductase activity, acting on the aldehyde or oxo group of donors||nucleotide binding||binding||small molecule binding||cofactor binding||coenzyme binding||organic cyclic compound binding||nucleoside phosphate binding||…	pti00220||pti01100||pti01110||pti01210||pti01230	Arginine biosynthesis||Metabolic pathways||Biosynthesis of secondary metabolites||2-Oxocarboxylic acid metabolism||Biosynthesis of amino acids
7204953	2.05538	0.0218227	0.100016	2.29361	0.00673928	0.028093	PHATRDRAFT_bd1668	NW_002238035.1	110660	112111	-	1452	protein_coding	predicted protein && Q9LIG0.1 RecName: Full=Clavaminate synthase-like protein At3g21360 && PF02668:Taurine catabolism dioxygenase TauD, TfdA family	-	GO:0055114||GO:0008152||GO:0008150	oxidation-reduction process||metabolic process||biological_process			GO:0016491||GO:0003674||GO:0003824	oxidoreductase activity||molecular_function||catalytic activity	--	--
7203329	2.02345	0.0676149	0.20803	2.63852	0.012103	0.0448557	PHATRDRAFT_4950	NC_011684.1	499026	499643	+	579	protein_coding	predicted protein && Q9SZT0.1 RecName: Full=Probable prolyl 4-hydroxylase 11; Short=AtP4H11 && PF13640:2OG-Fe(II) oxygenase superfamily	-	GO:0055114||GO:0008152||GO:0008150	oxidation-reduction process||metabolic process||biological_process			GO:0016491||GO:0003674||GO:0003824	oxidoreductase activity||molecular_function||catalytic activity	pti00330||pti01100	Arginine and proline metabolism||Metabolic pathways
7199332	1.89002	1.69499e-09	2.00269e-07	2.72979	4.74194e-35	2.83436e-32	PHATRDRAFT_50500	NC_011698.1	227400	228705	+	1306	protein_coding	predicted protein && P53111.1 RecName: Full=NADPH-dependent aldehyde reductase ARI1 && PF01073:3-beta hydroxysteroid dehydrogenase/isomerase family	-	GO:0006694||GO:0055114||GO:0008152||GO:0006629||GO:0008150||GO:0008202||GO:0008610||GO:0009058||GO:0044238||GO:0071704||GO:1901360||GO:1901362||GO:1901576	steroid biosynthetic process||oxidation-reduction process||metabolic process||lipid metabolic process||biological_process||steroid metabolic process||lipid biosynthetic process||biosynthetic process||primary metabolic process||organic substance metabolic process||organic cyclic compound metabolic process||organic cyclic compound biosynthetic process||organic substance biosynthetic process			GO:0003854||GO:0016616||GO:0003674||GO:0003824||GO:0016491||GO:0016229||GO:0016614||GO:0033764	3-beta-hydroxy-delta5-steroid dehydrogenase activity||oxidoreductase activity, acting on the CH-OH group of donors, NAD or NADP as acceptor||molecular_function||catalytic activity||oxidoreductase activity||steroid dehydrogenase activity||oxidoreductase activity, acting on CH-OH group of donors||steroid dehydrogenase activity, acting on the CH-OH group of donors, NAD or NADP as acceptor	--	--
7198746	1.88166	0.0210748	0.0974248	2.38383	0.00861355	0.0343743	PHATRDRAFT_50055	NC_011694.1	262996	264939	-	1820	protein_coding	predicted protein && - && PF13640:2OG-Fe(II) oxygenase superfamily|PF12796:Ankyrin repeats (3 copies)	-	GO:0055114||GO:0008152||GO:0008150	oxidation-reduction process||metabolic process||biological_process			GO:0016491||GO:0003674||GO:0003824	oxidoreductase activity||molecular_function||catalytic activity	--	--
7205083	1.82344	0.024592	0.108589	3.89674	8.34927e-05	0.000690468	PHATRDRAFT_bd1467	NW_002238036.1	271327	272844	-	1518	protein_coding	predicted protein && Q8VXV7.1 RecName: Full=Lysine-specific histone demethylase 1 homolog 1; AltName: Full=Flavin-containing amine oxidase domain-containing protein 1; AltName: Full=Protein LSD1-LIKE 1 && PF01593:Flavin containing amine oxidoreductase	Amino_oxidase	GO:0055114||GO:0008152||GO:0008150	oxidation-reduction process||metabolic process||biological_process			GO:0016491||GO:0003674||GO:0003824	oxidoreductase activity||molecular_function||catalytic activity	--	--
7204536	1.78153	0.0257959	0.111973	2.05693	0.00915982	0.0359936	PHATR_54643	NC_011679.1	426395	428035	+	1543	protein_coding	predicted protein && - && PF13640:2OG-Fe(II) oxygenase superfamily|PF12796:Ankyrin repeats (3 copies)	-	GO:0055114||GO:0008152||GO:0008150	oxidation-reduction process||metabolic process||biological_process			GO:0016491||GO:0003674||GO:0003824	oxidoreductase activity||molecular_function||catalytic activity	--	--
7200374	1.76776	1.84083e-08	1.67734e-06	1.49406	4.54556e-06	5.44606e-05	PHATRDRAFT_27166	NC_011675.1	639465	640973	-	1509	protein_coding	predicted protein && Q54UH8.1 RecName: Full=D-3-phosphoglycerate dehydrogenase; Short=3-PGDH && PF00389:D-isomer specific 2-hydroxyacid dehydrogenase, catalytic domain|PF02826:D-isomer specific 2-hydroxyacid dehydrogenase, NAD binding domain	2-Hacid_dh_C	GO:0008152||GO:0055114||GO:0008150	metabolic process||oxidation-reduction process||biological_process			GO:0016616||GO:0051287||GO:0003674||GO:0003824||GO:0016491||GO:0016614||GO:0000166||GO:0005488||GO:0036094||GO:0048037||GO:0050662||GO:0097159||GO:1901265||GO:1901363	oxidoreductase activity, acting on the CH-OH group of donors, NAD or NADP as acceptor||NAD binding||molecular_function||catalytic activity||oxidoreductase activity||oxidoreductase activity, acting on CH-OH group of donors||nucleotide binding||binding||small molecule binding||cofactor binding||coenzyme binding||organic cyclic compound binding||nucleoside phosphate binding||heterocyclic compound bi…	pti00260||pti00270||pti01100||pti01110||pti01200||pti01230	Glycine, serine and threonine metabolism||Cysteine and methionine metabolism||Metabolic pathways||Biosynthesis of secondary metabolites||Carbon metabolism||Biosynthesis of amino acids
7195168	1.7633	0.063618	0.200887	2.48821	0.0162936	0.0563493	PHATRDRAFT_48891	NC_011687.1	600955	602675	+	1587	protein_coding	hypothetical protein && Q20065.1 RecName: Full=Prolyl 4-hydroxylase subunit alpha-2; Short=4-PH alpha-2; AltName: Full=Procollagen-proline,2-oxoglutarate-4-dioxygenase subunit alpha-2; Flags: Precursor && PF13640:2OG-Fe(II) oxygenase superfamily|PF01549:ShK domain-like	ShTK	GO:0055114||GO:0008152||GO:0008150	oxidation-reduction process||metabolic process||biological_process			GO:0016491||GO:0003674||GO:0003824	oxidoreductase activity||molecular_function||catalytic activity	pti00330||pti01100	Arginine and proline metabolism||Metabolic pathways
7201295	1.69574	3.24796e-09	3.56348e-07	1.07048	3.60287e-09	8.9111e-08	GrpE	NC_011677.1	675536	677158	-	1575	protein_coding	GrpE protein%2C HSP90 cofactor%2C chloroplast targeted && Q01F03.1 RecName: Full=Prolyl 3,4-dihydroxylase OGFOD1; Short=otOGFOD1 && PF13640:2OG-Fe(II) oxygenase superfamily|PF10637:Oxoglutarate and iron-dependent oxygenase degradation C-term	-	GO:0055114||GO:0008152||GO:0008150	oxidation-reduction process||metabolic process||biological_process			GO:0016491||GO:0005506||GO:0016706||GO:0031418||GO:0003674||GO:0003824||GO:0005488||GO:0046872||GO:0043167||GO:0043169||GO:0046914||GO:0016705||GO:0051213||GO:0030246||GO:0019842||GO:0031406||GO:0036094||GO:0043168||GO:0043177||GO:0048029||GO:0048037||GO:0050662	oxidoreductase activity||iron ion binding||oxidoreductase activity, acting on paired donors, with incorporation or reduction of molecular oxygen, 2-oxoglutarate as one donor, and incorporation of one atom each of oxygen into both donors||L-ascorbic acid binding||molecular_function||catalytic activity||binding||metal ion binding||ion binding||cation binding||transition metal ion binding||oxidoredu…	--	--
7195595	1.64085	3.73807e-10	5.3589e-08	1.81866	3.97514e-06	4.83806e-05	PHATRDRAFT_30246	NC_011689.1	592856	594199	-	1344	protein_coding	predicted protein && Q6V4H0.1 RecName: Full=8-hydroxygeraniol dehydrogenase; Short=Cr10HGO && PF08240:Alcohol dehydrogenase GroES-like domain|PF00107:Zinc-binding dehydrogenase	ADH_N	GO:0055114||GO:0008152||GO:0008150	oxidation-reduction process||metabolic process||biological_process					--	--
7200392	1.62992	0.0202529	0.0950084	2.8671	1.1147e-05	0.000119453	PHATRDRAFT_45621	NC_011675.1	742342	743622	+	1281	protein_coding	predicted protein && Q6LM37.1 RecName: Full=Flavohemoprotein; AltName: Full=Flavohemoglobin; AltName: Full=Hemoglobin-like protein; AltName: Full=Nitric oxide dioxygenase; Short=NO oxygenase; Short=NOD && PF11563:Protoglobin|PF00970:Oxidoreductase FAD-binding domain	FAD_binding_6	GO:0055114||GO:0008152||GO:0008150	oxidation-reduction process||metabolic process||biological_process			GO:0016491||GO:0003674||GO:0003824	oxidoreductase activity||molecular_function||catalytic activity	--	--
7204948	1.58116	8.22886e-08	5.76858e-06	1.37927	3.21394e-10	9.49968e-09	PHATRDRAFT_bd348	NW_002238012.1	35190	36755	+	1566	protein_coding	predicted protein && Q01292.1 RecName: Full=Ketol-acid reductoisomerase, chloroplastic; AltName: Full=Acetohydroxy-acid reductoisomerase; AltName: Full=Alpha-keto-beta-hydroxylacyl reductoisomerase; Flags: Precursor && PF07991:Acetohydroxy acid isomeroreductase, NADPH-binding domain|PF01450:Acetohydroxy acid isomeroreductase, catalytic domain	-	GO:0055114||GO:0009082||GO:0008152||GO:0008150||GO:0006082||GO:0006520||GO:0006807||GO:0008652||GO:0009058||GO:0009081||GO:0009987||GO:0016053||GO:0019752||GO:0043436||GO:0044237||GO:0044238||GO:0044249||GO:0044281||GO:0044283||GO:0046394||GO:0071704||GO:1901564||GO:1901566||GO:1901576	oxidation-reduction process||branched-chain amino acid biosynthetic process||metabolic process||biological_process||organic acid metabolic process||cellular amino acid metabolic process||nitrogen compound metabolic process||cellular amino acid biosynthetic process||biosynthetic process||branched-chain amino acid metabolic process||cellular process||organic acid biosynthetic process||carboxylic ac…			GO:0004455||GO:0003674||GO:0003824||GO:0016491||GO:0016614||GO:0016616	ketol-acid reductoisomerase activity||molecular_function||catalytic activity||oxidoreductase activity||oxidoreductase activity, acting on CH-OH group of donors||oxidoreductase activity, acting on the CH-OH group of donors, NAD or NADP as acceptor	pti00290||pti00770||pti01100||pti01110||pti01210||pti01230	Valine, leucine and isoleucine biosynthesis||Pantothenate and CoA biosynthesis||Metabolic pathways||Biosynthesis of secondary metabolites||2-Oxocarboxylic acid metabolism||Biosynthesis of amino acids
7195548	1.5773	1.94333e-07	1.15634e-05	1.92905	4.02881e-15	2.64305e-13	PHATRDRAFT_49253	NC_011689.1	380396	382396	+	2001	protein_coding	predicted protein && Q8CPT6.1 RecName: Full=Coenzyme A disulfide reductase; Short=CoA-disulfide reductase; Short=CoADR >Q5HQI9.1 RecName: Full=Coenzyme A disulfide reductase; Short=CoA-disulfide reductase; Short=CoADR && PF07992:Pyridine nucleotide-disulphide oxidoreductase|PF02852:Pyridine nucleotide-disulphide oxidoreductase, dimerisation domain|PF00581:Rhodanese-like domain	Pyr_redox_2	GO:0055114||GO:0045454||GO:0008152||GO:0008150||GO:0009987||GO:0019725||GO:0042592||GO:0050789||GO:0050794||GO:0065007||GO:0065008	oxidation-reduction process||cell redox homeostasis||metabolic process||biological_process||cellular process||cellular homeostasis||homeostatic process||regulation of biological process||regulation of cellular process||biological regulation||regulation of biological quality			GO:0016491||GO:0050660||GO:0003674||GO:0003824||GO:0000166||GO:0005488||GO:0036094||GO:0043167||GO:0043168||GO:0048037||GO:0050662||GO:0097159||GO:1901265||GO:1901363	oxidoreductase activity||flavin adenine dinucleotide binding||molecular_function||catalytic activity||nucleotide binding||binding||small molecule binding||ion binding||anion binding||cofactor binding||coenzyme binding||organic cyclic compound binding||nucleoside phosphate binding||heterocyclic compound binding	--	--
7195287	1.51995	0.0691959	0.210901	5.03722	4.07898e-07	6.1898e-06	PHATRDRAFT_54983	NC_011688.1	363350	366343	+	2851	protein_coding	predicted protein && P39869.1 RecName: Full=Nitrate reductase [NADH]; Short=NR && PF00970:Oxidoreductase FAD-binding domain|PF00174:Oxidoreductase molybdopterin binding domain|PF00175:Oxidoreductase NAD-binding domain|PF00173:Cytochrome b5-like Heme/Steroid binding domain|PF03404:Mo-co oxidoreductase dimerisation domain	FAD_binding_6	GO:0042128||GO:0055114||GO:0008152||GO:0006082||GO:0006807||GO:0008150||GO:0009987||GO:0042126||GO:0043436||GO:0044237||GO:0044281||GO:0071704||GO:0071941||GO:2001057	nitrate assimilation||oxidation-reduction process||metabolic process||organic acid metabolic process||nitrogen compound metabolic process||biological_process||cellular process||nitrate metabolic process||oxoacid metabolic process||cellular metabolic process||small molecule metabolic process||organic substance metabolic process||nitrogen cycle metabolic process||reactive nitrogen species metabolic…			GO:0016491||GO:0030151||GO:0003674||GO:0003824||GO:0005488||GO:0046872||GO:0043167||GO:0043169||GO:0046914	oxidoreductase activity||molybdenum ion binding||molecular_function||catalytic activity||binding||metal ion binding||ion binding||cation binding||transition metal ion binding	pti00910||pti01100	Nitrogen metabolism||Metabolic pathways
7204310	1.51758	2.66079e-06	0.000101811	2.14893	5.23858e-28	1.52329e-25	PHATR_43904	NC_011671.1	387855	390089	-	2166	protein_coding	phytoene desaturase. zeta-carotene desaturase. bacterial-like protein && P21334.1 RecName: Full=Phytoene desaturase; AltName: Full=Albino-1 protein; AltName: Full=Phytoene desaturase (3,4-didehydrolycopene-forming); Flags: Precursor && PF01593:Flavin containing amine oxidoreductase	Amino_oxidase	GO:0055114||GO:0008152||GO:0008150	oxidation-reduction process||metabolic process||biological_process			GO:0016491||GO:0003674||GO:0003824	oxidoreductase activity||molecular_function||catalytic activity	pti01100||pti01110	Metabolic pathways||Biosynthesis of secondary metabolites
7198894	1.51218	1.59102e-07	9.88826e-06	1.49723	5.63155e-12	2.2334e-10	PHATRDRAFT_30967	NC_011695.1	364401	366964	-	2261	protein_coding	predicted protein && Q01292.1 RecName: Full=Ketol-acid reductoisomerase, chloroplastic; AltName: Full=Acetohydroxy-acid reductoisomerase; AltName: Full=Alpha-keto-beta-hydroxylacyl reductoisomerase; Flags: Precursor && PF07991:Acetohydroxy acid isomeroreductase, NADPH-binding domain|PF01450:Acetohydroxy acid isomeroreductase, catalytic domain	-	GO:0009082||GO:0055114||GO:0008152||GO:0006082||GO:0006520||GO:0006807||GO:0008150||GO:0008652||GO:0009058||GO:0009081||GO:0009987||GO:0016053||GO:0019752||GO:0043436||GO:0044237||GO:0044238||GO:0044249||GO:0044281||GO:0044283||GO:0046394||GO:0071704||GO:1901564||GO:1901566||GO:1901576	branched-chain amino acid biosynthetic process||oxidation-reduction process||metabolic process||organic acid metabolic process||cellular amino acid metabolic process||nitrogen compound metabolic process||biological_process||cellular amino acid biosynthetic process||biosynthetic process||branched-chain amino acid metabolic process||cellular process||organic acid biosynthetic process||carboxylic ac…			GO:0004455||GO:0003674||GO:0003824||GO:0016491||GO:0016614||GO:0016616	ketol-acid reductoisomerase activity||molecular_function||catalytic activity||oxidoreductase activity||oxidoreductase activity, acting on CH-OH group of donors||oxidoreductase activity, acting on the CH-OH group of donors, NAD or NADP as acceptor	pti00290||pti00770||pti01100||pti01110||pti01210||pti01230	Valine, leucine and isoleucine biosynthesis||Pantothenate and CoA biosynthesis||Metabolic pathways||Biosynthesis of secondary metabolites||2-Oxocarboxylic acid metabolism||Biosynthesis of amino acids
7203934	1.5098	2.58785e-06	9.93733e-05	0.744525	0.000151525	0.00116865	ACD1	NC_011671.1	1342002	1343869	+	1601	protein_coding	short chain acyl-coenzyme A dehydrogenase && Q3ZBF6.1 RecName: Full=Short-chain specific acyl-CoA dehydrogenase, mitochondrial; Short=SCAD; AltName: Full=Butyryl-CoA dehydrogenase; Flags: Precursor && PF02771:Acyl-CoA dehydrogenase, N-terminal domain|PF00441:Acyl-CoA dehydrogenase, C-terminal domain|PF02770:Acyl-CoA dehydrogenase, middle domain	-	GO:0008152||GO:0055114||GO:0008150	metabolic process||oxidation-reduction process||biological_process			GO:0016627||GO:0050660||GO:0003995||GO:0003674||GO:0003824||GO:0016491||GO:0000166||GO:0005488||GO:0036094||GO:0043167||GO:0043168||GO:0048037||GO:0050662||GO:0097159||GO:1901265||GO:1901363	oxidoreductase activity, acting on the CH-CH group of donors||flavin adenine dinucleotide binding||acyl-CoA dehydrogenase activity||molecular_function||catalytic activity||oxidoreductase activity||nucleotide binding||binding||small molecule binding||ion binding||anion binding||cofactor binding||coenzyme binding||organic cyclic compound binding||nucleoside phosphate binding||heterocyclic compound …	pti00071||pti00280||pti00410||pti00640||pti00650||pti01100||pti01110||pti01200||pti01212	Fatty acid degradation||Valine, leucine and isoleucine degradation||beta-Alanine metabolism||Propanoate metabolism||Butanoate metabolism||Metabolic pathways||Biosynthesis of secondary metabolites||Carbon metabolism||Fatty acid metabolism
7196018	1.48787	3.51886e-06	0.000130465	1.04043	1.62823e-07	2.70341e-06	PHATRDRAFT_31718	NC_011669.1	765983	767417	+	1407	protein_coding	predicted protein && A0JNA3.2 RecName: Full=Inosine-5'-monophosphate dehydrogenase 1; Short=IMP dehydrogenase 1; Short=IMPD 1; Short=IMPDH 1 && PF00478:IMP dehydrogenase / GMP reductase domain	-	GO:0055114||GO:0008152||GO:0008150	oxidation-reduction process||metabolic process||biological_process			GO:0003824||GO:0003674	catalytic activity||molecular_function	pti00230||pti01100||pti01110	Purine metabolism||Metabolic pathways||Biosynthesis of secondary metabolites
7200088	1.44696	0.0031049	0.0261424	1.92373	0.00011875	0.000939203	PHATRDRAFT_26813	NC_011674.1	457684	459213	-	1403	protein_coding	predicted protein && P52985.1 RecName: Full=Homoserine dehydrogenase; Short=HDH && PF03447:Homoserine dehydrogenase, NAD binding domain|PF00742:Homoserine dehydrogenase	-	GO:0055114||GO:0006520||GO:0008152||GO:0008150||GO:0006082||GO:0006807||GO:0009987||GO:0019752||GO:0043436||GO:0044237||GO:0044238||GO:0044281||GO:0071704||GO:1901564	oxidation-reduction process||cellular amino acid metabolic process||metabolic process||biological_process||organic acid metabolic process||nitrogen compound metabolic process||cellular process||carboxylic acid metabolic process||oxoacid metabolic process||cellular metabolic process||primary metabolic process||small molecule metabolic process||organic substance metabolic process||organonitrogen co…			GO:0016491||GO:0050661||GO:0003674||GO:0003824||GO:0000166||GO:0005488||GO:0036094||GO:0048037||GO:0050662||GO:0097159||GO:1901265||GO:1901363	oxidoreductase activity||NADP binding||molecular_function||catalytic activity||nucleotide binding||binding||small molecule binding||cofactor binding||coenzyme binding||organic cyclic compound binding||nucleoside phosphate binding||heterocyclic compound binding	--	--
7200404	1.41238	0.000701228	0.00878502	1.34245	0.000670803	0.00416092	PHATRDRAFT_5902	NC_011675.1	802070	802804	+	639	protein_coding	predicted protein && Q8YVS7.1 RecName: Full=Heme oxygenase 1 && PF01126:Heme oxygenase	-	GO:0006788||GO:0055114||GO:0008152||GO:0006725||GO:0006778||GO:0006787||GO:0006807||GO:0008150||GO:0009056||GO:0009987||GO:0019439||GO:0033013||GO:0033015||GO:0034641||GO:0042168||GO:0042440||GO:0044237||GO:0044248||GO:0044270||GO:0046483||GO:0046700||GO:0051186||GO:0051187||GO:0071704||GO:1901360||GO:1901361||GO:1901564||GO:1901565||GO:1901575	heme oxidation||oxidation-reduction process||metabolic process||cellular aromatic compound metabolic process||porphyrin-containing compound metabolic process||porphyrin-containing compound catabolic process||nitrogen compound metabolic process||biological_process||catabolic process||cellular process||aromatic compound catabolic process||tetrapyrrole metabolic process||tetrapyrrole catabolic proce…			GO:0004392||GO:0003674||GO:0003824||GO:0016491||GO:0016705	heme oxygenase (decyclizing) activity||molecular_function||catalytic activity||oxidoreductase activity||oxidoreductase activity, acting on paired donors, with incorporation or reduction of molecular oxygen	pti00860||pti01100||pti01110	Porphyrin and chlorophyll metabolism||Metabolic pathways||Biosynthesis of secondary metabolites
7199682	1.41075	6.66381e-09	6.51357e-07	0.694899	2.61961e-05	0.000252096	PHATRDRAFT_45017	NC_011673.1	1009622	1012281	+	2571	protein_coding	predicted protein && P16100.5 RecName: Full=Isocitrate dehydrogenase [NADP]; Short=IDH; AltName: Full=Oxalosuccinate decarboxylase && PF03971:Monomeric isocitrate dehydrogenase	IDH	GO:0006099||GO:0055114||GO:0008152||GO:0006082||GO:0006091||GO:0006101||GO:0008150||GO:0009060||GO:0009987||GO:0015980||GO:0016999||GO:0017144||GO:0019752||GO:0043436||GO:0044237||GO:0044238||GO:0044281||GO:0045333||GO:0071704||GO:0072350	tricarboxylic acid cycle||oxidation-reduction process||metabolic process||organic acid metabolic process||generation of precursor metabolites and energy||citrate metabolic process||biological_process||aerobic respiration||cellular process||energy derivation by oxidation of organic compounds||antibiotic metabolic process||drug metabolic process||carboxylic acid metabolic process||oxoacid metabolic…			GO:0004450||GO:0003674||GO:0003824||GO:0004448||GO:0016491||GO:0016614||GO:0016616	isocitrate dehydrogenase (NADP+) activity||molecular_function||catalytic activity||isocitrate dehydrogenase activity||oxidoreductase activity||oxidoreductase activity, acting on CH-OH group of donors||oxidoreductase activity, acting on the CH-OH group of donors, NAD or NADP as acceptor	--	--
7196361	1.40099	0.000440132	0.00628701	2.79593	1.2512e-20	1.79488e-18	PHATRDRAFT_42726	NC_011669.1	906036	908770	-	2445	protein_coding	predicted protein && P07742.2 RecName: Full=Ribonucleoside-diphosphate reductase large subunit; AltName: Full=Ribonucleoside-diphosphate reductase subunit M1; AltName: Full=Ribonucleotide reductase large subunit && PF02867:Ribonucleotide reductase, barrel domain|PF00317:Ribonucleotide reductase, all-alpha domain|PF03477:ATP cone domain	Ribonuc_red_lgC	GO:0006260||GO:0055114||GO:0008152||GO:0006139||GO:0006259||GO:0006725||GO:0006807||GO:0008150||GO:0009058||GO:0009059||GO:0009987||GO:0034641||GO:0034645||GO:0043170||GO:0044237||GO:0044238||GO:0044249||GO:0044260||GO:0046483||GO:0071704||GO:0090304||GO:1901360||GO:1901576	DNA replication||oxidation-reduction process||metabolic process||nucleobase-containing compound metabolic process||DNA metabolic process||cellular aromatic compound metabolic process||nitrogen compound metabolic process||biological_process||biosynthetic process||macromolecule biosynthetic process||cellular process||cellular nitrogen compound metabolic process||cellular macromolecule biosynthetic …			GO:0004748||GO:0005524||GO:0003674||GO:0003824||GO:0016491||GO:0016725||GO:0016728||GO:0061731||GO:0000166||GO:0005488||GO:0008144||GO:0017076||GO:0030554||GO:0032553||GO:0032555||GO:0032559||GO:0035639||GO:0036094||GO:0043167||GO:0043168||GO:0097159||GO:0097367||GO:1901265||GO:1901363	ribonucleoside-diphosphate reductase activity, thioredoxin disulfide as acceptor||ATP binding||molecular_function||catalytic activity||oxidoreductase activity||oxidoreductase activity, acting on CH or CH2 groups||oxidoreductase activity, acting on CH or CH2 groups, disulfide as acceptor||ribonucleoside-diphosphate reductase activity||nucleotide binding||binding||drug binding||purine nucleotide bi…	pti00230||pti00240||pti00480||pti01100	Purine metabolism||Pyrimidine metabolism||Glutathione metabolism||Metabolic pathways
7198201	1.29274	0.00061554	0.00800276	0.628497	0.0483784	0.130648	PHATRDRAFT_30471	NC_011691.1	123868	125488	+	1404	protein_coding	predicted protein && Q9SE94.1 RecName: Full=Methylenetetrahydrofolate reductase 1; AltName: Full=ZmMTHFR1 && PF02219:Methylenetetrahydrofolate reductase	-	GO:0006555||GO:0055114||GO:0000096||GO:0006790||GO:0008152||GO:0006082||GO:0006520||GO:0006807||GO:0008150||GO:0009066||GO:0009987||GO:0019752||GO:0043436||GO:0044237||GO:0044238||GO:0044281||GO:0071704||GO:1901564||GO:1901605	methionine metabolic process||oxidation-reduction process||sulfur amino acid metabolic process||sulfur compound metabolic process||metabolic process||organic acid metabolic process||cellular amino acid metabolic process||nitrogen compound metabolic process||biological_process||aspartate family amino acid metabolic process||cellular process||carboxylic acid metabolic process||oxoacid metabolic pro…			GO:0004489||GO:0003674||GO:0003824||GO:0016491||GO:0016645||GO:0016646	methylenetetrahydrofolate reductase (NAD(P)H) activity||molecular_function||catalytic activity||oxidoreductase activity||oxidoreductase activity, acting on the CH-NH group of donors||oxidoreductase activity, acting on the CH-NH group of donors, NAD or NADP as acceptor	pti00670||pti01100||pti01200	One carbon pool by folate||Metabolic pathways||Carbon metabolism
7203858	1.25761	0.000744949	0.00916441	1.58128	8.06997e-08	1.4375e-06	PHATR_10260	NC_011671.1	907446	909191	-	1395	protein_coding	predicted protein && P0AB69.1 RecName: Full=NAD(P) transhydrogenase subunit beta; AltName: Full=Nicotinamide nucleotide transhydrogenase subunit beta; AltName: Full=Pyridine nucleotide transhydrogenase subunit beta >P0AB68.1 RecName: Full=NAD(P) transhydrogenase subunit beta; AltName: Full=Nicotinamide nucleotide transhydrogenase subunit beta; AltName: Full=Pyridine nucleotide transhydrogenase su…	-	GO:0055114||GO:0008152||GO:0008150	oxidation-reduction process||metabolic process||biological_process	GO:0016021||GO:0005575||GO:0016020||GO:0031224||GO:0044425	integral component of membrane||cellular_component||membrane||intrinsic component of membrane||membrane part	GO:0008750||GO:0050661||GO:0003674||GO:0003824||GO:0016491||GO:0008746||GO:0016651||GO:0016652||GO:0000166||GO:0005488||GO:0036094||GO:0048037||GO:0050662||GO:0097159||GO:1901265||GO:1901363	NAD(P)+ transhydrogenase (AB-specific) activity||NADP binding||molecular_function||catalytic activity||oxidoreductase activity||NAD(P)+ transhydrogenase activity||oxidoreductase activity, acting on NAD(P)H||oxidoreductase activity, acting on NAD(P)H, NAD(P) as acceptor||nucleotide binding||binding||small molecule binding||cofactor binding||coenzyme binding||organic cyclic compound binding||nucleo…	--	--
7196375	1.25068	6.11045e-08	4.56247e-06	1.19907	1.4356e-07	2.42095e-06	PHATRDRAFT_9266	NC_011669.1	957311	957985	+	675	protein_coding	predicted protein && Q5AF03.1 RecName: Full=Glyoxalase 3; AltName: Full=Glutathione-independent glyoxalase && PF01965:DJ-1/PfpI family	DJ-1_PfpI	--	--	--	--	--	--	--	--
7194931	1.24713	0.23411	0.443863	2.73544	0.000356032	0.00245548	PHATRDRAFT_39237	NC_011686.1	688210	689256	+	1047	protein_coding	predicted protein && B4UMJ1.1 RecName: Full=L-threonine 3-dehydrogenase; Short=TDH && PF08240:Alcohol dehydrogenase GroES-like domain|PF00107:Zinc-binding dehydrogenase	ADH_zinc_N	GO:0055114||GO:0008152||GO:0008150	oxidation-reduction process||metabolic process||biological_process					--	--
7200902	1.24305	0.00786547	0.0508842	1.77594	0.00289271	0.0140319	PHATRDRAFT_12416	NC_011676.1	165190	166845	+	1656	protein_coding	predicted protein && Q2RQN9.1 RecName: Full=Hydroxylamine reductase; AltName: Full=Hybrid-cluster protein; Short=HCP; AltName: Full=Prismane protein && PF03063:Prismane/CO dehydrogenase family	-	GO:0055114||GO:0008152||GO:0008150	oxidation-reduction process||metabolic process||biological_process			GO:0003824||GO:0016491||GO:0003674	catalytic activity||oxidoreductase activity||molecular_function	--	--
7199840	1.17714	0.000256513	0.00404997	0.400814	0.164631	0.318353	PHATRDRAFT_51757	NC_011673.1	702059	703645	+	1587	protein_coding	cytochrome P450 && Q9ZV29.1 RecName: Full=Cytochrome P450 710A3; AltName: Full=C-22 sterol desaturase && PF00067:Cytochrome P450	p450	GO:0055114||GO:0008152||GO:0008150	oxidation-reduction process||metabolic process||biological_process			GO:0005506||GO:0016705||GO:0020037||GO:0003674||GO:0005488||GO:0046872||GO:0043167||GO:0043169||GO:0046914||GO:0003824||GO:0016491||GO:0046906||GO:0048037||GO:0097159||GO:1901363	iron ion binding||oxidoreductase activity, acting on paired donors, with incorporation or reduction of molecular oxygen||heme binding||molecular_function||binding||metal ion binding||ion binding||cation binding||transition metal ion binding||catalytic activity||oxidoreductase activity||tetrapyrrole binding||cofactor binding||organic cyclic compound binding||heterocyclic compound binding	--	--
7195038	1.17638	0.00209468	0.0196527	2.99627	1.52782e-28	4.98115e-26	PHATRDRAFT_39306	NC_011687.1	176212	177102	-	891	protein_coding	predicted protein && P50651.2 RecName: Full=Ribonucleoside-diphosphate reductase small chain A; AltName: Full=Ribonucleoside-diphosphate reductase R2A subunit; Short=AtRNR2; Short=Protein R2at; AltName: Full=Ribonucleotide reductase small subunit A && PF00268:Ribonucleotide reductase, small chain	-	GO:0009186||GO:0055114||GO:0008152||GO:0006139||GO:0006725||GO:0006753||GO:0006793||GO:0006796||GO:0006807||GO:0008150||GO:0009132||GO:0009987||GO:0019637||GO:0034641||GO:0044237||GO:0044238||GO:0044281||GO:0046483||GO:0055086||GO:0071704||GO:1901360	deoxyribonucleoside diphosphate metabolic process||oxidation-reduction process||metabolic process||nucleobase-containing compound metabolic process||cellular aromatic compound metabolic process||nucleoside phosphate metabolic process||phosphorus metabolic process||phosphate-containing compound metabolic process||nitrogen compound metabolic process||biological_process||nucleoside diphosphate metab…					pti00230||pti00240||pti00480||pti01100	Purine metabolism||Pyrimidine metabolism||Glutathione metabolism||Metabolic pathways
7203602	1.1231	5.16737e-06	0.000178076	1.85042	1.57542e-21	2.52984e-19	PEPCase_2	NC_011685.1	403161	406016	+	2741	protein_coding	predicted protein && A4XXP6.1 RecName: Full=Phosphoenolpyruvate carboxylase; Short=PEPC; Short=PEPCase && PF00311:Phosphoenolpyruvate carboxylase	-	GO:0006099||GO:0015977||GO:0008152||GO:0006082||GO:0006091||GO:0006101||GO:0055114||GO:0008150||GO:0009060||GO:0009987||GO:0015980||GO:0016999||GO:0017144||GO:0019752||GO:0043436||GO:0044237||GO:0044238||GO:0044281||GO:0045333||GO:0071704||GO:0072350	tricarboxylic acid cycle||carbon fixation||metabolic process||organic acid metabolic process||generation of precursor metabolites and energy||citrate metabolic process||oxidation-reduction process||biological_process||aerobic respiration||cellular process||energy derivation by oxidation of organic compounds||antibiotic metabolic process||drug metabolic process||carboxylic acid metabolic process||…			GO:0003824||GO:0008964||GO:0003674||GO:0004611||GO:0016829||GO:0016830||GO:0016831	catalytic activity||phosphoenolpyruvate carboxylase activity||molecular_function||phosphoenolpyruvate carboxykinase activity||lyase activity||carbon-carbon lyase activity||carboxy-lyase activity	pti00620||pti00710||pti01100||pti01200	Pyruvate metabolism||Carbon fixation in photosynthetic organisms||Metabolic pathways||Carbon metabolism
7200384	1.09913	0.00269683	0.0235402	1.15554	1.16031e-05	0.000123847	PHATRDRAFT_45605	NC_011675.1	673315	674387	+	1073	protein_coding	predicted protein && - && PF14226:non-haem dioxygenase in morphine synthesis N-terminal|PF03171:2OG-Fe(II) oxygenase superfamily	2OG-FeII_Oxy	GO:0055114||GO:0008152||GO:0008150	oxidation-reduction process||metabolic process||biological_process			GO:0016491||GO:0003674||GO:0003824	oxidoreductase activity||molecular_function||catalytic activity	--	--
7199027	1.0902	3.20218e-07	1.71293e-05	0.725476	0.00166891	0.00887582	PHATRDRAFT_41170	NC_011696.1	126615	128295	+	1596	protein_coding	predicted protein && Q56X52.2 RecName: Full=Ubiquinol oxidase 4, chloroplastic/chromoplastic; AltName: Full=Alternative oxidase 4; AltName: Full=Plastid terminal oxidase; AltName: Full=Protein IMMUTANS; Flags: Precursor && PF01786:Alternative oxidase	AOX	GO:0055114||GO:0008152||GO:0008150	oxidation-reduction process||metabolic process||biological_process			GO:0009916||GO:0003674||GO:0003824||GO:0016491||GO:0016682||GO:0016679	alternative oxidase activity||molecular_function||catalytic activity||oxidoreductase activity||oxidoreductase activity, acting on diphenols and related substances as donors, oxygen as acceptor||oxidoreductase activity, acting on diphenols and related substances as donors	--	--
7196410	1.0586	0.000136107	0.00243497	0.513099	0.00765448	0.0312607	PHATRDRAFT_17523	NC_011669.1	1137051	1138442	-	1392	protein_coding	predicted protein && Q9LSD0.1 RecName: Full=Ribonucleoside-diphosphate reductase small chain C; AltName: Full=Ribonucleoside-diphosphate reductase TSO2 subunit; AltName: Full=Ribonucleotide reductase small subunit C && PF00268:Ribonucleotide reductase, small chain	-	GO:0009186||GO:0055114||GO:0008152||GO:0006139||GO:0006725||GO:0006753||GO:0006793||GO:0006796||GO:0006807||GO:0008150||GO:0009132||GO:0009987||GO:0019637||GO:0034641||GO:0044237||GO:0044238||GO:0044281||GO:0046483||GO:0055086||GO:0071704||GO:1901360	deoxyribonucleoside diphosphate metabolic process||oxidation-reduction process||metabolic process||nucleobase-containing compound metabolic process||cellular aromatic compound metabolic process||nucleoside phosphate metabolic process||phosphorus metabolic process||phosphate-containing compound metabolic process||nitrogen compound metabolic process||biological_process||nucleoside diphosphate metab…					pti00230||pti00240||pti00480||pti01100	Purine metabolism||Pyrimidine metabolism||Glutathione metabolism||Metabolic pathways
7195420	1.03568	6.6446e-06	0.000219149	0.541135	0.0407924	0.115042	CREG1	NC_011688.1	420603	421401	-	736	protein_coding	cellular repressor of e1a-stimulated gene-like protein && O75629.1 RecName: Full=Protein CREG1; AltName: Full=Cellular repressor of E1A-stimulated genes 1; Flags: Precursor && PF13883:Pyridoxamine 5'-phosphate oxidase	-	GO:0055114||GO:0008152||GO:0008150	oxidation-reduction process||metabolic process||biological_process			GO:0010181||GO:0016491||GO:0000166||GO:0003674||GO:0005488||GO:0032553||GO:0036094||GO:0043167||GO:0043168||GO:0048037||GO:0050662||GO:0097159||GO:0097367||GO:1901265||GO:1901363||GO:0003824	FMN binding||oxidoreductase activity||nucleotide binding||molecular_function||binding||ribonucleotide binding||small molecule binding||ion binding||anion binding||cofactor binding||coenzyme binding||organic cyclic compound binding||carbohydrate derivative binding||nucleoside phosphate binding||heterocyclic compound binding||catalytic activity	--	--
7201793	1.02801	0.0111741	0.0642793	1.0624	1.1809e-06	1.62888e-05	PHATRDRAFT_46438	NC_011678.1	340064	342003	+	1861	protein_coding	predicted protein && Q9VL92.1 RecName: Full=Cytochrome P450 4e3; AltName: Full=CYPIVE3 && PF00067:Cytochrome P450	p450	GO:0055114||GO:0008152||GO:0008150	oxidation-reduction process||metabolic process||biological_process			GO:0005506||GO:0016705||GO:0020037||GO:0003674||GO:0005488||GO:0046872||GO:0043167||GO:0043169||GO:0046914||GO:0003824||GO:0016491||GO:0046906||GO:0048037||GO:0097159||GO:1901363	iron ion binding||oxidoreductase activity, acting on paired donors, with incorporation or reduction of molecular oxygen||heme binding||molecular_function||binding||metal ion binding||ion binding||cation binding||transition metal ion binding||catalytic activity||oxidoreductase activity||tetrapyrrole binding||cofactor binding||organic cyclic compound binding||heterocyclic compound binding	--	--
7199710	1.02006	0.00180867	0.017695	0.658086	0.00621554	0.0262397	PHATRDRAFT_51720	NC_011673.1	64932	66938	+	2007	protein_coding	fumarate reductase flavoprotein && O13755.1 RecName: Full=Fumarate reductase; Short=FRDS; AltName: Full=FAD-dependent oxidoreductase; AltName: Full=NADH-dependent fumarate reductase && PF00173:Cytochrome b5-like Heme/Steroid binding domain|PF00890:FAD binding domain	-	GO:0055114||GO:0008152||GO:0008150	oxidation-reduction process||metabolic process||biological_process			GO:0016491||GO:0003674||GO:0003824	oxidoreductase activity||molecular_function||catalytic activity	--	--
7205035	0.962481	0.000222652	0.00363823	2.22338	1.97924e-36	1.25263e-33	PHATRDRAFT_bd1820	NW_002238036.1	173390	174497	+	1108	protein_coding	alcohol dehydrogenase && - && PF00107:Zinc-binding dehydrogenase	ADH_zinc_N	GO:0055114||GO:0008152||GO:0008150	oxidation-reduction process||metabolic process||biological_process					--	--
7201753	0.95141	0.0020506	0.0193947	1.08266	1.32707e-10	4.10286e-09	IPMDH	NC_011678.1	951037	952545	+	1392	protein_coding	3-isopropylmalate dehydrogenase && Q5MZ40.2 RecName: Full=3-isopropylmalate dehydrogenase; AltName: Full=3-IPM-DH; AltName: Full=Beta-IPM dehydrogenase; Short=IMDH >Q31N34.1 RecName: Full=3-isopropylmalate dehydrogenase; AltName: Full=3-IPM-DH; AltName: Full=Beta-IPM dehydrogenase; Short=IMDH && PF00180:Isocitrate/isopropylmalate dehydrogenase	-	GO:0055114||GO:0008152||GO:0008150	oxidation-reduction process||metabolic process||biological_process			GO:0016616||GO:0003674||GO:0003824||GO:0016491||GO:0016614	oxidoreductase activity, acting on the CH-OH group of donors, NAD or NADP as acceptor||molecular_function||catalytic activity||oxidoreductase activity||oxidoreductase activity, acting on CH-OH group of donors	--	--
7198783	0.932957	0.00836242	0.0529167	1.87317	7.32401e-08	1.32882e-06	PHATRDRAFT_50006	NC_011694.1	115434	118075	-	2557	protein_coding	predicted protein && - && PF05023:Phytochelatin synthase	-	GO:0010038||GO:0046938||GO:0008150||GO:0010035||GO:0042221||GO:0050896||GO:0008152||GO:0006518||GO:0006807||GO:0009058||GO:0009987||GO:0019748||GO:0034641||GO:0043043||GO:0043603||GO:0043604||GO:0044237||GO:0044249||GO:0044271||GO:0044550||GO:0046937||GO:0071704||GO:1901564||GO:1901566||GO:1901576	response to metal ion||phytochelatin biosynthetic process||biological_process||response to inorganic substance||response to chemical||response to stimulus||metabolic process||peptide metabolic process||nitrogen compound metabolic process||biosynthetic process||cellular process||secondary metabolic process||cellular nitrogen compound metabolic process||peptide biosynthetic process||cellular amide …			GO:0016756||GO:0046872||GO:0003674||GO:0003824||GO:0016740||GO:0016746||GO:0016755||GO:0140096||GO:0005488||GO:0043167||GO:0043169	glutathione gamma-glutamylcysteinyltransferase activity||metal ion binding||molecular_function||catalytic activity||transferase activity||transferase activity, transferring acyl groups||transferase activity, transferring amino-acyl groups||catalytic activity, acting on a protein||binding||ion binding||cation binding	--	--
7197893	0.932058	0.00391037	0.0308695	1.9566	1.51456e-15	1.04456e-13	PHATRDRAFT_10757	NC_011672.1	1262913	1264130	+	1038	protein_coding	predicted protein && Q55512.2 RecName: Full=Aspartate-semialdehyde dehydrogenase; Short=ASA dehydrogenase; Short=ASADH; AltName: Full=Aspartate-beta-semialdehyde dehydrogenase && PF01118:Semialdehyde dehydrogenase, NAD binding domain|PF02774:Semialdehyde dehydrogenase, dimerisation domain	-	GO:0055114||GO:0008652||GO:0008152||GO:0008150||GO:0006082||GO:0006520||GO:0006807||GO:0009058||GO:0009987||GO:0016053||GO:0019752||GO:0043436||GO:0044237||GO:0044238||GO:0044249||GO:0044281||GO:0044283||GO:0046394||GO:0071704||GO:1901564||GO:1901566||GO:1901576	oxidation-reduction process||cellular amino acid biosynthetic process||metabolic process||biological_process||organic acid metabolic process||cellular amino acid metabolic process||nitrogen compound metabolic process||biosynthetic process||cellular process||organic acid biosynthetic process||carboxylic acid metabolic process||oxoacid metabolic process||cellular metabolic process||primary metaboli…	GO:0005737||GO:0005622||GO:0005575||GO:0005623||GO:0044424||GO:0044464	cytoplasm||intracellular||cellular_component||cell||intracellular part||cell part	GO:0016620||GO:0051287||GO:0003942||GO:0046983||GO:0003674||GO:0003824||GO:0016491||GO:0016903||GO:0000166||GO:0005488||GO:0036094||GO:0048037||GO:0050662||GO:0097159||GO:1901265||GO:1901363||GO:0005515	oxidoreductase activity, acting on the aldehyde or oxo group of donors, NAD or NADP as acceptor||NAD binding||N-acetyl-gamma-glutamyl-phosphate reductase activity||protein dimerization activity||molecular_function||catalytic activity||oxidoreductase activity||oxidoreductase activity, acting on the aldehyde or oxo group of donors||nucleotide binding||binding||small molecule binding||cofactor bindi…	--	--
7205026	0.930076	0.00628707	0.0435839	1.14317	0.000251257	0.00182233	PHATRDRAFT_bd176	NW_002238035.1	94134	94787	+	654	protein_coding	predicted protein && Q26710.2 RecName: Full=Alternative oxidase, mitochondrial; Flags: Precursor && PF01786:Alternative oxidase	AOX	GO:0055114||GO:0008152||GO:0008150	oxidation-reduction process||metabolic process||biological_process			GO:0009916||GO:0003674||GO:0003824||GO:0016491||GO:0016682||GO:0016679	alternative oxidase activity||molecular_function||catalytic activity||oxidoreductase activity||oxidoreductase activity, acting on diphenols and related substances as donors, oxygen as acceptor||oxidoreductase activity, acting on diphenols and related substances as donors	--	--
7201045	0.881611	0.00236412	0.0214869	1.27775	1.0283e-06	1.44432e-05	PHATRDRAFT_35832	NC_011676.1	840514	842090	-	1422	protein_coding	predicted protein && Q9FF12.1 RecName: Full=Flavin-containing monooxygenase FMO GS-OX-like 9; AltName: Full=Flavin-monooxygenase glucosinolate S-oxygenase-like 9 && PF00743:Flavin-binding monooxygenase-like	FMO-like	GO:0055114||GO:0008152||GO:0008150	oxidation-reduction process||metabolic process||biological_process			GO:0004499||GO:0050660||GO:0050661||GO:0016491||GO:0003674||GO:0003824||GO:0004497||GO:0016705||GO:0016709||GO:0000166||GO:0005488||GO:0036094||GO:0043167||GO:0043168||GO:0048037||GO:0050662||GO:0097159||GO:1901265||GO:1901363	N,N-dimethylaniline monooxygenase activity||flavin adenine dinucleotide binding||NADP binding||oxidoreductase activity||molecular_function||catalytic activity||monooxygenase activity||oxidoreductase activity, acting on paired donors, with incorporation or reduction of molecular oxygen||oxidoreductase activity, acting on paired donors, with incorporation or reduction of molecular oxygen, NAD(P)H a…	--	--
7198056	0.848619	0.000142678	0.00251658	1.53756	1.00246e-17	9.21837e-16	PHATRDRAFT_44393	NC_011672.1	414409	416446	-	2038	protein_coding	predicted protein && - && -	-	GO:0055114||GO:0008152||GO:0008150	oxidation-reduction process||metabolic process||biological_process			GO:0016491||GO:0003674||GO:0003824	oxidoreductase activity||molecular_function||catalytic activity	--	--
7204888	0.763231	0.00226768	0.0208751	1.09846	5.89467e-05	0.000506556	PHATRDRAFT_bd1315	NW_002238035.1	57567	59121	-	1491	protein_coding	predicted protein && - && PF07992:Pyridine nucleotide-disulphide oxidoreductase	Pyr_redox_2	GO:0055114||GO:0008152||GO:0008150	oxidation-reduction process||metabolic process||biological_process			GO:0016491||GO:0003674||GO:0003824	oxidoreductase activity||molecular_function||catalytic activity	--	--
7197563	0.513406	0.195962	0.399353	1.28457	0.00463686	0.0206833	TPI/GapC3	NC_011670.1	712196	714407	-	1986	protein_coding	triosephosphate isomerase/glyceraldehyde-3-phosphate dehydrogenase precursor && P26988.1 RecName: Full=Glyceraldehyde-3-phosphate dehydrogenase; Short=GAPDH && PF00121:Triosephosphate isomerase|PF00044:Glyceraldehyde 3-phosphate dehydrogenase, NAD binding domain|PF02800:Glyceraldehyde 3-phosphate dehydrogenase, C-terminal domain	-	GO:0008152||GO:0055114||GO:0008150	metabolic process||oxidation-reduction process||biological_process			GO:0004807||GO:0016620||GO:0003674||GO:0003824||GO:0016853||GO:0016860||GO:0016861||GO:0016491||GO:0016903	triose-phosphate isomerase activity||oxidoreductase activity, acting on the aldehyde or oxo group of donors, NAD or NADP as acceptor||molecular_function||catalytic activity||isomerase activity||intramolecular oxidoreductase activity||intramolecular oxidoreductase activity, interconverting aldoses and ketoses||oxidoreductase activity||oxidoreductase activity, acting on the aldehyde or oxo group of…	pti00010||pti00710||pti01100||pti01110||pti01200||pti01230	Glycolysis / Gluconeogenesis||Carbon fixation in photosynthetic organisms||Metabolic pathways||Biosynthesis of secondary metabolites||Carbon metabolism||Biosynthesis of amino acids
7197206	0.477129	0.283612	0.495273	2.63341	0.000500328	0.0032638	GapC4	NC_011670.1	715026	716234	+	1011	protein_coding	predicted protein && P26988.1 RecName: Full=Glyceraldehyde-3-phosphate dehydrogenase; Short=GAPDH && PF02800:Glyceraldehyde 3-phosphate dehydrogenase, C-terminal domain|PF00044:Glyceraldehyde 3-phosphate dehydrogenase, NAD binding domain	-	GO:0055114||GO:0008152||GO:0008150	oxidation-reduction process||metabolic process||biological_process			GO:0016620||GO:0003674||GO:0003824||GO:0016491||GO:0016903	oxidoreductase activity, acting on the aldehyde or oxo group of donors, NAD or NADP as acceptor||molecular_function||catalytic activity||oxidoreductase activity||oxidoreductase activity, acting on the aldehyde or oxo group of donors	pti00010||pti00710||pti01100||pti01110||pti01200||pti01230	Glycolysis / Gluconeogenesis||Carbon fixation in photosynthetic organisms||Metabolic pathways||Biosynthesis of secondary metabolites||Carbon metabolism||Biosynthesis of amino acids
7204657	0.323962	0.233949	0.443715	-1.28269	1.28078e-06	1.7554e-05	PHATR_36821	NC_011679.1	444744	446055	-	1161	protein_coding	predicted protein && Q5RCE0.3 RecName: Full=Glycerol-3-phosphate dehydrogenase [NAD(+)], cytoplasmic; Short=GPD-C; Short=GPDH-C && PF07479:NAD-dependent glycerol-3-phosphate dehydrogenase C-terminus|PF01210:NAD-dependent glycerol-3-phosphate dehydrogenase N-terminus	NAD_Gly3P_dh_C	GO:0005975||GO:0055114||GO:0046168||GO:0008152||GO:0008150||GO:0044238||GO:0071704||GO:0006072||GO:0006793||GO:0006796||GO:0009056||GO:0009987||GO:0019637||GO:0044237||GO:0046434||GO:0052646||GO:1901135||GO:1901136||GO:1901575	carbohydrate metabolic process||oxidation-reduction process||glycerol-3-phosphate catabolic process||metabolic process||biological_process||primary metabolic process||organic substance metabolic process||glycerol-3-phosphate metabolic process||phosphorus metabolic process||phosphate-containing compound metabolic process||catabolic process||cellular process||organophosphate metabolic process||cell…			GO:0004367||GO:0016616||GO:0051287||GO:0003674||GO:0003824||GO:0016491||GO:0016614||GO:0000166||GO:0005488||GO:0036094||GO:0048037||GO:0050662||GO:0097159||GO:1901265||GO:1901363	glycerol-3-phosphate dehydrogenase [NAD+] activity||oxidoreductase activity, acting on the CH-OH group of donors, NAD or NADP as acceptor||NAD binding||molecular_function||catalytic activity||oxidoreductase activity||oxidoreductase activity, acting on CH-OH group of donors||nucleotide binding||binding||small molecule binding||cofactor binding||coenzyme binding||organic cyclic compound binding||nu…	pti00564||pti01110	Glycerophospholipid metabolism||Biosynthesis of secondary metabolites
7197895	0.190504	0.461858	0.664157	1.02383	0.000151034	0.00116653	PHATRDRAFT_44690	NC_011672.1	1274384	1275434	-	1051	protein_coding	predicted protein && O66534.1 RecName: Full=Riboflavin biosynthesis protein RibD; Includes: RecName: Full=Diaminohydroxyphosphoribosylaminopyrimidine deaminase; Short=DRAP deaminase; AltName: Full=Riboflavin-specific deaminase; Includes: RecName: Full=5-amino-6-(5-phosphoribosylamino)uracil reductase; AltName: Full=HTP reductase && PF01872:RibD C-terminal domain	RibD_C	GO:0009231||GO:0055114||GO:0008152||GO:0006766||GO:0006767||GO:0006771||GO:0006807||GO:0008150||GO:0009058||GO:0009110||GO:0009987||GO:0017144||GO:0018130||GO:0034641||GO:0042364||GO:0042726||GO:0042727||GO:0044237||GO:0044249||GO:0044271||GO:0044281||GO:0044283||GO:0046483||GO:0071704||GO:1901360||GO:1901362||GO:1901564||GO:1901566||GO:1901576	riboflavin biosynthetic process||oxidation-reduction process||metabolic process||vitamin metabolic process||water-soluble vitamin metabolic process||riboflavin metabolic process||nitrogen compound metabolic process||biological_process||biosynthetic process||vitamin biosynthetic process||cellular process||drug metabolic process||heterocycle biosynthetic process||cellular nitrogen compound metaboli…			GO:0008703||GO:0003674||GO:0003824||GO:0016491||GO:0016614||GO:0016616	5-amino-6-(5-phosphoribosylamino)uracil reductase activity||molecular_function||catalytic activity||oxidoreductase activity||oxidoreductase activity, acting on CH-OH group of donors||oxidoreductase activity, acting on the CH-OH group of donors, NAD or NADP as acceptor	--	--
7203017	0.0473585	0.863221	0.930462	-1.8214	9.11941e-12	3.46424e-10	GapC1	NC_011683.1	748753	750258	+	1256	protein_coding	glyceraldehyde-3-phosphate dehydrogenase precursor && O09452.1 RecName: Full=Glyceraldehyde-3-phosphate dehydrogenase, chloroplastic; AltName: Full=NAD(P)-dependent glyceraldehyde-3-phosphate dehydrogenase; Flags: Precursor && PF00044:Glyceraldehyde 3-phosphate dehydrogenase, NAD binding domain|PF02800:Glyceraldehyde 3-phosphate dehydrogenase, C-terminal domain	-	GO:0055114||GO:0008152||GO:0008150	oxidation-reduction process||metabolic process||biological_process			GO:0016620||GO:0003674||GO:0003824||GO:0016491||GO:0016903	oxidoreductase activity, acting on the aldehyde or oxo group of donors, NAD or NADP as acceptor||molecular_function||catalytic activity||oxidoreductase activity||oxidoreductase activity, acting on the aldehyde or oxo group of donors	pti00010||pti00710||pti01100||pti01110||pti01200||pti01230	Glycolysis / Gluconeogenesis||Carbon fixation in photosynthetic organisms||Metabolic pathways||Biosynthesis of secondary metabolites||Carbon metabolism||Biosynthesis of amino acids
7197926	-0.341334	0.20283	0.40786	-1.25213	6.79327e-09	1.58946e-07	PHATRDRAFT_10852	NC_011672.1	1309035	1309535	+	501	protein_coding	predicted protein && - && PF04116:Fatty acid hydroxylase superfamily	-	GO:0006633||GO:0055114||GO:0008152||GO:0006082||GO:0006629||GO:0006631||GO:0008150||GO:0008610||GO:0009058||GO:0009987||GO:0016053||GO:0019752||GO:0032787||GO:0043436||GO:0044237||GO:0044238||GO:0044249||GO:0044255||GO:0044281||GO:0044283||GO:0046394||GO:0071704||GO:0072330||GO:1901576	fatty acid biosynthetic process||oxidation-reduction process||metabolic process||organic acid metabolic process||lipid metabolic process||fatty acid metabolic process||biological_process||lipid biosynthetic process||biosynthetic process||cellular process||organic acid biosynthetic process||carboxylic acid metabolic process||monocarboxylic acid metabolic process||oxoacid metabolic process||cellula…			GO:0005506||GO:0016491||GO:0003674||GO:0005488||GO:0046872||GO:0043167||GO:0043169||GO:0046914||GO:0003824	iron ion binding||oxidoreductase activity||molecular_function||binding||metal ion binding||ion binding||cation binding||transition metal ion binding||catalytic activity	--	--
7204128	-0.401833	NA	1	2.68466	0.0203218	0.0670406	HemF_2	NC_011671.1	1340236	1341114	-	879	protein_coding	coproporphyrinogen oxidase. coproporphyrinogen III oxidase. coproporphyrinogenase && P35055.1 RecName: Full=Oxygen-dependent coproporphyrinogen-III oxidase, chloroplastic; Short=Coprogen oxidase; Short=Coproporphyrinogenase; Flags: Precursor && PF01218:Coproporphyrinogen III oxidase	-	GO:0006779||GO:0055114||GO:0008152||GO:0006725||GO:0006778||GO:0006807||GO:0008150||GO:0009058||GO:0009987||GO:0018130||GO:0019438||GO:0033013||GO:0033014||GO:0034641||GO:0044237||GO:0044249||GO:0044271||GO:0046483||GO:0051186||GO:0051188||GO:0071704||GO:1901360||GO:1901362||GO:1901564||GO:1901566||GO:1901576	porphyrin-containing compound biosynthetic process||oxidation-reduction process||metabolic process||cellular aromatic compound metabolic process||porphyrin-containing compound metabolic process||nitrogen compound metabolic process||biological_process||biosynthetic process||cellular process||heterocycle biosynthetic process||aromatic compound biosynthetic process||tetrapyrrole metabolic process||t…			GO:0004109||GO:0003674||GO:0003824||GO:0016491||GO:0016627||GO:0016634	coproporphyrinogen oxidase activity||molecular_function||catalytic activity||oxidoreductase activity||oxidoreductase activity, acting on the CH-CH group of donors||oxidoreductase activity, acting on the CH-CH group of donors, oxygen as acceptor	pti00860||pti01100||pti01110	Porphyrin and chlorophyll metabolism||Metabolic pathways||Biosynthesis of secondary metabolites
7203423	-0.447419	0.0706079	0.213622	-1.22761	8.684e-11	2.74797e-09	PHATRDRAFT_14769	NC_011684.1	100887	101369	+	483	protein_coding	predicted protein && P54151.1 RecName: Full=Peptide methionine sulfoxide reductase; AltName: Full=Peptide-methionine (S)-S-oxide reductase; Short=Peptide Met(O) reductase; AltName: Full=Protein-methionine-S-oxide reductase && PF01625:Peptide methionine sulfoxide reductase	PMSR	GO:0055114||GO:0008152||GO:0008150	oxidation-reduction process||metabolic process||biological_process			GO:0008113||GO:0003674||GO:0003824||GO:0016491||GO:0016667||GO:0016671	peptide-methionine (S)-S-oxide reductase activity||molecular_function||catalytic activity||oxidoreductase activity||oxidoreductase activity, acting on a sulfur group of donors||oxidoreductase activity, acting on a sulfur group of donors, disulfide as acceptor	--	--
7200688	-0.486908	0.0776686	0.227819	-1.09832	0.00108319	0.00620887	FRE4	NC_011675.1	191174	193569	-	2396	protein_coding	ferric reductase && O81211.2 RecName: Full=Respiratory burst oxidase homolog protein E; AltName: Full=NADPH oxidase RBOHE; Short=AtRBOHE && PF08022:FAD-binding domain	FAD_binding_8	GO:0055114||GO:0008152||GO:0008150	oxidation-reduction process||metabolic process||biological_process			GO:0016491||GO:0003674||GO:0003824	oxidoreductase activity||molecular_function||catalytic activity	--	--
7197107	-0.512326	0.027849	0.11784	-1.21736	2.15245e-08	4.49674e-07	ME1	NC_011670.1	236007	237923	-	1917	protein_coding	predicted protein && Q6TU48.1 RecName: Full=NADP-dependent malic enzyme; Short=NADP-ME; AltName: Full=SrfA-induced gene A protein && PF03949:Malic enzyme, NAD binding domain|PF00390:Malic enzyme, N-terminal domain	Malic_M	GO:0055114||GO:0008152||GO:0008150	oxidation-reduction process||metabolic process||biological_process			GO:0004471||GO:0051287||GO:0003674||GO:0003824||GO:0004470||GO:0016491||GO:0016614||GO:0016615||GO:0016616||GO:0000166||GO:0005488||GO:0036094||GO:0048037||GO:0050662||GO:0097159||GO:1901265||GO:1901363	malate dehydrogenase (decarboxylating) (NAD+) activity||NAD binding||molecular_function||catalytic activity||malic enzyme activity||oxidoreductase activity||oxidoreductase activity, acting on CH-OH group of donors||malate dehydrogenase activity||oxidoreductase activity, acting on the CH-OH group of donors, NAD or NADP as acceptor||nucleotide binding||binding||small molecule binding||cofactor bind…	pti00620||pti00710||pti01100||pti01200	Pyruvate metabolism||Carbon fixation in photosynthetic organisms||Metabolic pathways||Carbon metabolism
7197832	-0.535529	0.00659916	0.0451075	-1.14803	6.20786e-06	7.18949e-05	PHATRDRAFT_18893	NC_011672.1	316118	317475	-	1150	protein_coding	predicted protein && O74489.2 RecName: Full=Probable quinone oxidoreductase; AltName: Full=NADPH:quinone reductase && PF08240:Alcohol dehydrogenase GroES-like domain|PF00107:Zinc-binding dehydrogenase	ADH_zinc_N	GO:0055114||GO:0008152||GO:0008150	oxidation-reduction process||metabolic process||biological_process					--	--
7197542	-0.575335	0.00483071	0.0360193	-1.24011	3.20002e-11	1.10349e-09	PHATRDRAFT_43490	NC_011670.1	599190	601260	-	2024	protein_coding	predicted protein && - && PF03055:Retinal pigment epithelial membrane protein	RPE65	GO:0055114||GO:0008152||GO:0008150	oxidation-reduction process||metabolic process||biological_process			GO:0016702||GO:0003674||GO:0003824||GO:0016491||GO:0016701||GO:0051213	oxidoreductase activity, acting on single donors with incorporation of molecular oxygen, incorporation of two atoms of oxygen||molecular_function||catalytic activity||oxidoreductase activity||oxidoreductase activity, acting on single donors with incorporation of molecular oxygen||dioxygenase activity	--	--
novel.181	-0.614986	0.0119655	0.0671354	-1.30293	5.70293e-11	1.85933e-09	novel.181	NC_011677.1	445042	447656	-	2289	-	PF04116:Fatty acid hydroxylase superfamily	-	GO:0008610||GO:0055114||GO:0008152||GO:0006629||GO:0008150||GO:0009058||GO:0044238||GO:0071704||GO:1901576	lipid biosynthetic process||oxidation-reduction process||metabolic process||lipid metabolic process||biological_process||biosynthetic process||primary metabolic process||organic substance metabolic process||organic substance biosynthetic process			GO:0005506||GO:0016491||GO:0003674||GO:0005488||GO:0046872||GO:0043167||GO:0043169||GO:0046914||GO:0003824	iron ion binding||oxidoreductase activity||molecular_function||binding||metal ion binding||ion binding||cation binding||transition metal ion binding||catalytic activity	--	--
7201739	-0.717632	0.017589	0.0857507	-1.10406	0.000251457	0.00182233	PHATRDRAFT_13107	NC_011678.1	896652	897164	+	513	protein_coding	predicted protein && Q9SEC2.1 RecName: Full=Peptide methionine sulfoxide reductase; AltName: Full=Peptide-methionine (S)-S-oxide reductase; Short=Peptide Met(O) reductase; AltName: Full=Protein-methionine-S-oxide reductase && PF01625:Peptide methionine sulfoxide reductase	PMSR	GO:0055114||GO:0008152||GO:0008150	oxidation-reduction process||metabolic process||biological_process			GO:0008113||GO:0003674||GO:0003824||GO:0016491||GO:0016667||GO:0016671	peptide-methionine (S)-S-oxide reductase activity||molecular_function||catalytic activity||oxidoreductase activity||oxidoreductase activity, acting on a sulfur group of donors||oxidoreductase activity, acting on a sulfur group of donors, disulfide as acceptor	--	--
7199064	-0.744789	0.000200052	0.00335041	-1.83144	1.40501e-09	3.79813e-08	PHATRDRAFT_41243	NC_011696.1	286714	288431	+	1650	protein_coding	predicted protein && - && PF02668:Taurine catabolism dioxygenase TauD, TfdA family	-	GO:0055114||GO:0008152||GO:0008150	oxidation-reduction process||metabolic process||biological_process			GO:0016491||GO:0003674||GO:0003824	oxidoreductase activity||molecular_function||catalytic activity	--	--
7197242	-0.934473	2.06106e-05	0.000547174	-1.2932	1.77938e-07	2.9139e-06	HemA	NC_011670.1	1232245	1234274	+	1763	protein_coding	glutamyl-trna reductase && Q117I4.1 RecName: Full=Glutamyl-tRNA reductase; Short=GluTR && PF00745:Glutamyl-tRNAGlu reductase, dimerisation domain|PF01488:Shikimate / quinate 5-dehydrogenase|PF05201:Glutamyl-tRNAGlu reductase, N-terminal domain	-	GO:0033014||GO:0055114||GO:0008152||GO:0006725||GO:0006807||GO:0008150||GO:0009058||GO:0009987||GO:0018130||GO:0019438||GO:0033013||GO:0034641||GO:0044237||GO:0044249||GO:0044271||GO:0046483||GO:0071704||GO:1901360||GO:1901362||GO:1901564||GO:1901566||GO:1901576	tetrapyrrole biosynthetic process||oxidation-reduction process||metabolic process||cellular aromatic compound metabolic process||nitrogen compound metabolic process||biological_process||biosynthetic process||cellular process||heterocycle biosynthetic process||aromatic compound biosynthetic process||tetrapyrrole metabolic process||cellular nitrogen compound metabolic process||cellular metabolic pr…			GO:0008883||GO:0050661||GO:0003674||GO:0003824||GO:0016491||GO:0016620||GO:0016903||GO:0140098||GO:0140101||GO:0000166||GO:0005488||GO:0036094||GO:0048037||GO:0050662||GO:0097159||GO:1901265||GO:1901363	glutamyl-tRNA reductase activity||NADP binding||molecular_function||catalytic activity||oxidoreductase activity||oxidoreductase activity, acting on the aldehyde or oxo group of donors, NAD or NADP as acceptor||oxidoreductase activity, acting on the aldehyde or oxo group of donors||catalytic activity, acting on RNA||catalytic activity, acting on a tRNA||nucleotide binding||binding||small molecule …	pti00860||pti01100||pti01110	Porphyrin and chlorophyll metabolism||Metabolic pathways||Biosynthesis of secondary metabolites
7202958	-0.965704	0.0012628	0.0134966	-1.08953	0.000422169	0.00282407	PHATRDRAFT_47806	NC_011683.1	107359	108546	+	1188	protein_coding	predicted protein && - && -	-	GO:0055114||GO:0008152||GO:0008150	oxidation-reduction process||metabolic process||biological_process			GO:0016491||GO:0003674||GO:0003824	oxidoreductase activity||molecular_function||catalytic activity	--	--
7203267	-1.0032	1.46052e-05	0.000421006	-1.68519	2.69796e-14	1.51976e-12	GDCP	NC_011684.1	205248	208721	-	3116	protein_coding	glycine decarboxylase p- protein && Q87I05.1 RecName: Full=Glycine dehydrogenase (decarboxylating); AltName: Full=Glycine cleavage system P-protein; AltName: Full=Glycine decarboxylase; AltName: Full=Glycine dehydrogenase (aminomethyl-transferring) && PF02347:Glycine cleavage system P-protein	-	GO:0006546||GO:0055114||GO:0001505||GO:0008152||GO:0006082||GO:0006520||GO:0006544||GO:0006807||GO:0008150||GO:0009056||GO:0009063||GO:0009069||GO:0009071||GO:0009987||GO:0016054||GO:0017144||GO:0019752||GO:0042133||GO:0042135||GO:0042737||GO:0043436||GO:0044237||GO:0044238||GO:0044248||GO:0044281||GO:0044282||GO:0046395||GO:0065007||GO:0065008||GO:0071704||GO:1901564||GO:1901565||GO:1901575||GO:…	glycine catabolic process||oxidation-reduction process||regulation of neurotransmitter levels||metabolic process||organic acid metabolic process||cellular amino acid metabolic process||glycine metabolic process||nitrogen compound metabolic process||biological_process||catabolic process||cellular amino acid catabolic process||serine family amino acid metabolic process||serine family amino acid cat…			GO:0004375||GO:0003674||GO:0003824||GO:0016491||GO:0016638||GO:0016642	glycine dehydrogenase (decarboxylating) activity||molecular_function||catalytic activity||oxidoreductase activity||oxidoreductase activity, acting on the CH-NH2 group of donors||oxidoreductase activity, acting on the CH-NH2 group of donors, disulfide as acceptor	pti00260||pti00630||pti01100||pti01110||pti01200	Glycine, serine and threonine metabolism||Glyoxylate and dicarboxylate metabolism||Metabolic pathways||Biosynthesis of secondary metabolites||Carbon metabolism
7200954	-1.00664	0.00144036	0.014992	-0.67302	0.000167256	0.00127174	VDL2	NC_011676.1	452932	454926	+	1919	protein_coding	precursor of protein violaxanthin deepoxidase-like protein && - && PF07137:VDE lipocalin domain	-	GO:0055114||GO:0008152||GO:0008150	oxidation-reduction process||metabolic process||biological_process	GO:0009507||GO:0005622||GO:0005575||GO:0005623||GO:0005737||GO:0043231||GO:0009536||GO:0043226||GO:0043227||GO:0043229||GO:0044424||GO:0044444||GO:0044464	chloroplast||intracellular||cellular_component||cell||cytoplasm||intracellular membrane-bounded organelle||plastid||organelle||membrane-bounded organelle||intracellular organelle||intracellular part||cytoplasmic part||cell part	GO:0046422||GO:0003674||GO:0003824||GO:0016491	violaxanthin de-epoxidase activity||molecular_function||catalytic activity||oxidoreductase activity	--	--
7204401	-1.02146	3.39047e-05	0.000815533	-1.87529	1.12063e-12	5.10882e-11	PDS-like1	NC_011671.1	645554	647227	-	1638	protein_coding	PDS-like 1%2C phytoene desaturase-like protein%2C phytoene dehydrogenase-like protein && - && PF01593:Flavin containing amine oxidoreductase	Amino_oxidase	GO:0055114||GO:0008152||GO:0008150	oxidation-reduction process||metabolic process||biological_process			GO:0016491||GO:0003674||GO:0003824	oxidoreductase activity||molecular_function||catalytic activity	--	--
7200414	-1.02296	0.00375027	0.0300021	-0.214138	0.297598	0.48141	PHATRDRAFT_45657	NC_011675.1	837901	839970	+	2070	protein_coding	predicted protein && Q4V8T0.1 RecName: Full=Inositol oxygenase; AltName: Full=Myo-inositol oxygenase; Short=MI oxygenase && PF05153:Myo-inositol oxygenase	-	GO:0019310||GO:0055114||GO:0008152||GO:0005975||GO:0006020||GO:0006066||GO:0008150||GO:0009056||GO:0009987||GO:0016052||GO:0019751||GO:0044237||GO:0044238||GO:0044248||GO:0044262||GO:0044275||GO:0044281||GO:0044282||GO:0046164||GO:0046174||GO:0071704||GO:1901575||GO:1901615||GO:1901616	inositol catabolic process||oxidation-reduction process||metabolic process||carbohydrate metabolic process||inositol metabolic process||alcohol metabolic process||biological_process||catabolic process||cellular process||carbohydrate catabolic process||polyol metabolic process||cellular metabolic process||primary metabolic process||cellular catabolic process||cellular carbohydrate metabolic proces…	GO:0005737||GO:0005622||GO:0005575||GO:0005623||GO:0044424||GO:0044464	cytoplasm||intracellular||cellular_component||cell||intracellular part||cell part	GO:0005506||GO:0050113||GO:0003674||GO:0005488||GO:0046872||GO:0043167||GO:0043169||GO:0046914||GO:0003824||GO:0016491||GO:0016701	iron ion binding||inositol oxygenase activity||molecular_function||binding||metal ion binding||ion binding||cation binding||transition metal ion binding||catalytic activity||oxidoreductase activity||oxidoreductase activity, acting on single donors with incorporation of molecular oxygen	--	--
7199630	-1.04991	3.76435e-09	4.04742e-07	-0.815236	0.000312956	0.00220359	HDS	NC_011673.1	765110	767756	-	2358	protein_coding	1-hydroxy-2-methyl-2-(E)-butenyl-4-diphosphate synthase && Q6K8J4.1 RecName: Full=4-hydroxy-3-methylbut-2-en-1-yl diphosphate synthase (ferredoxin), chloroplastic; AltName: Full=1-hydroxy-2-methyl-2-(E)-butenyl 4-diphosphate synthase; Flags: Precursor && PF04551:GcpE protein	-	GO:0016114||GO:0055114||GO:0008152||GO:0006629||GO:0006720||GO:0006721||GO:0008150||GO:0008299||GO:0008610||GO:0009058||GO:0009987||GO:0044237||GO:0044238||GO:0044249||GO:0044255||GO:0071704||GO:1901576	terpenoid biosynthetic process||oxidation-reduction process||metabolic process||lipid metabolic process||isoprenoid metabolic process||terpenoid metabolic process||biological_process||isoprenoid biosynthetic process||lipid biosynthetic process||biosynthetic process||cellular process||cellular metabolic process||primary metabolic process||cellular biosynthetic process||cellular lipid metabolic pro…			GO:0046429||GO:0003674||GO:0003824||GO:0016491||GO:0016725||GO:0052592	4-hydroxy-3-methylbut-2-en-1-yl diphosphate synthase activity||molecular_function||catalytic activity||oxidoreductase activity||oxidoreductase activity, acting on CH or CH2 groups||oxidoreductase activity, acting on CH or CH2 groups, with an iron-sulfur protein as acceptor	pti00900||pti01100||pti01110	Terpenoid backbone biosynthesis||Metabolic pathways||Biosynthesis of secondary metabolites
7198039	-1.07421	1.48745e-07	9.35264e-06	-0.85542	0.00262935	0.0129234	PHATRDRAFT_10830	NC_011672.1	314604	315152	-	549	protein_coding	predicted protein && Q7NL66.2 RecName: Full=15,16-dihydrobiliverdin:ferredoxin oxidoreductase && PF05996:Ferredoxin-dependent bilin reductase	-	GO:0010024||GO:0055114||GO:0008152||GO:0006725||GO:0006807||GO:0008150||GO:0009058||GO:0009987||GO:0018130||GO:0019438||GO:0033013||GO:0033014||GO:0034641||GO:0044237||GO:0044249||GO:0044271||GO:0046483||GO:0051186||GO:0051188||GO:0051202||GO:0071704||GO:1901360||GO:1901362||GO:1901564||GO:1901566||GO:1901576	phytochromobilin biosynthetic process||oxidation-reduction process||metabolic process||cellular aromatic compound metabolic process||nitrogen compound metabolic process||biological_process||biosynthetic process||cellular process||heterocycle biosynthetic process||aromatic compound biosynthetic process||tetrapyrrole metabolic process||tetrapyrrole biosynthetic process||cellular nitrogen compound m…			GO:0016636||GO:0050897||GO:0003674||GO:0003824||GO:0016491||GO:0016627||GO:0005488||GO:0046872||GO:0043167||GO:0043169||GO:0046914	oxidoreductase activity, acting on the CH-CH group of donors, iron-sulfur protein as acceptor||cobalt ion binding||molecular_function||catalytic activity||oxidoreductase activity||oxidoreductase activity, acting on the CH-CH group of donors||binding||metal ion binding||ion binding||cation binding||transition metal ion binding	--	--
7196181	-1.08072	1.91825e-06	7.79584e-05	-0.775738	0.000836551	0.0050005	PHATRDRAFT_8975	NC_011669.1	1520280	1521398	-	1053	protein_coding	predicted protein && Q949Q0.1 RecName: Full=Glycerol-3-phosphate dehydrogenase [NAD(+)] 2, chloroplastic; AltName: Full=Protein SUPPRESSOR OF FATTY ACID DESATURASE DEFICIENCY 1; Flags: Precursor && PF01210:NAD-dependent glycerol-3-phosphate dehydrogenase N-terminus|PF07479:NAD-dependent glycerol-3-phosphate dehydrogenase C-terminus	NAD_Gly3P_dh_C	GO:0055114||GO:0046168||GO:0005975||GO:0008152||GO:0008150||GO:0006072||GO:0006793||GO:0006796||GO:0009056||GO:0009987||GO:0019637||GO:0044237||GO:0046434||GO:0052646||GO:0071704||GO:1901135||GO:1901136||GO:1901575||GO:0044238	oxidation-reduction process||glycerol-3-phosphate catabolic process||carbohydrate metabolic process||metabolic process||biological_process||glycerol-3-phosphate metabolic process||phosphorus metabolic process||phosphate-containing compound metabolic process||catabolic process||cellular process||organophosphate metabolic process||cellular metabolic process||organophosphate catabolic process||aldit…			GO:0016616||GO:0051287||GO:0004367||GO:0003674||GO:0003824||GO:0016491||GO:0016614||GO:0000166||GO:0005488||GO:0036094||GO:0048037||GO:0050662||GO:0097159||GO:1901265||GO:1901363	oxidoreductase activity, acting on the CH-OH group of donors, NAD or NADP as acceptor||NAD binding||glycerol-3-phosphate dehydrogenase [NAD+] activity||molecular_function||catalytic activity||oxidoreductase activity||oxidoreductase activity, acting on CH-OH group of donors||nucleotide binding||binding||small molecule binding||cofactor binding||coenzyme binding||organic cyclic compound binding||nu…	pti00564||pti01110	Glycerophospholipid metabolism||Biosynthesis of secondary metabolites
7203855	-1.14134	0.000354267	0.0052539	-0.737912	0.00318263	0.0151622	PHATR_33435	NC_011671.1	898071	898932	-	798	protein_coding	predicted protein && - && PF04116:Fatty acid hydroxylase superfamily	-	GO:0006633||GO:0055114||GO:0008152||GO:0006082||GO:0006629||GO:0006631||GO:0008150||GO:0008610||GO:0009058||GO:0009987||GO:0016053||GO:0019752||GO:0032787||GO:0043436||GO:0044237||GO:0044238||GO:0044249||GO:0044255||GO:0044281||GO:0044283||GO:0046394||GO:0071704||GO:0072330||GO:1901576	fatty acid biosynthetic process||oxidation-reduction process||metabolic process||organic acid metabolic process||lipid metabolic process||fatty acid metabolic process||biological_process||lipid biosynthetic process||biosynthetic process||cellular process||organic acid biosynthetic process||carboxylic acid metabolic process||monocarboxylic acid metabolic process||oxoacid metabolic process||cellula…			GO:0005506||GO:0016491||GO:0003674||GO:0005488||GO:0046872||GO:0043167||GO:0043169||GO:0046914||GO:0003824	iron ion binding||oxidoreductase activity||molecular_function||binding||metal ion binding||ion binding||cation binding||transition metal ion binding||catalytic activity	--	--
7198811	-1.14576	4.93938e-06	0.000171871	-2.40111	9.64404e-20	1.20651e-17	PHATRDRAFT_23717	NC_011694.1	300193	301801	+	1260	protein_coding	predicted protein && O23877.1 RecName: Full=Ferredoxin--NADP reductase, embryo isozyme, chloroplastic; Short=FNR; Flags: Precursor && PF00175:Oxidoreductase NAD-binding domain	NAD_binding_1	GO:0055114||GO:0008152||GO:0008150	oxidation-reduction process||metabolic process||biological_process			GO:0016491||GO:0003674||GO:0003824	oxidoreductase activity||molecular_function||catalytic activity	pti00195||pti01100	Photosynthesis||Metabolic pathways
7203920	-1.16651	0.00110585	0.0122327	-1.00784	9.15834e-05	0.000744781	PHATR_33568	NC_011671.1	1264244	1265225	-	801	protein_coding	predicted protein && O23365.2 RecName: Full=Cytochrome P450 97B3, chloroplastic; Flags: Precursor && PF00067:Cytochrome P450	p450	GO:0055114||GO:0008152||GO:0008150	oxidation-reduction process||metabolic process||biological_process			GO:0005506||GO:0016705||GO:0020037||GO:0003674||GO:0005488||GO:0046872||GO:0043167||GO:0043169||GO:0046914||GO:0003824||GO:0016491||GO:0046906||GO:0048037||GO:0097159||GO:1901363	iron ion binding||oxidoreductase activity, acting on paired donors, with incorporation or reduction of molecular oxygen||heme binding||molecular_function||binding||metal ion binding||ion binding||cation binding||transition metal ion binding||catalytic activity||oxidoreductase activity||tetrapyrrole binding||cofactor binding||organic cyclic compound binding||heterocyclic compound binding	--	--
7195920	-1.21578	2.46648e-05	0.000621068	-1.91736	2.01943e-09	5.27356e-08	PHATRDRAFT_40135	NC_011690.1	237208	238593	-	1386	protein_coding	predicted protein && - && PF03435:Saccharopine dehydrogenase NADP binding domain	Saccharop_dh	GO:0055114||GO:0008152||GO:0008150	oxidation-reduction process||metabolic process||biological_process			GO:0016491||GO:0003674||GO:0003824	oxidoreductase activity||molecular_function||catalytic activity	--	--
7199949	-1.22398	1.75819e-06	7.2153e-05	-1.03331	2.59295e-05	0.000249754	PHATRDRAFT_34964	NC_011674.1	767088	769052	+	1965	protein_coding	predicted protein && O88867.1 RecName: Full=Kynurenine 3-monooxygenase; AltName: Full=Kynurenine 3-hydroxylase && -	-	GO:0055114||GO:0008152||GO:0008150	oxidation-reduction process||metabolic process||biological_process			GO:0016491||GO:0003674||GO:0003824	oxidoreductase activity||molecular_function||catalytic activity	--	--
7195322	-1.31351	4.93292e-07	2.46692e-05	-2.93088	1.2121e-05	0.000128483	pDLDH1	NC_011688.1	551721	553830	+	1882	protein_coding	lipoamide dehydrogenase && A8MS68.1 RecName: Full=Dihydrolipoyl dehydrogenase 1, chloroplastic; Short=ptLPD1; AltName: Full=Dihydrolipoamide dehydrogenase 1; AltName: Full=Protein LIPOAMIDE DEHYDROGENASE 1; AltName: Full=Pyruvate dehydrogenase complex E3 subunit 1; Short=E3-1; Short=PDC-E3 1; Flags: Precursor && PF07992:Pyridine nucleotide-disulphide oxidoreductase|PF02852:Pyridine nucleotide-dis…	Pyr_redox_2	GO:0055114||GO:0045454||GO:0008152||GO:0008150||GO:0009987||GO:0019725||GO:0042592||GO:0050789||GO:0050794||GO:0065007||GO:0065008	oxidation-reduction process||cell redox homeostasis||metabolic process||biological_process||cellular process||cellular homeostasis||homeostatic process||regulation of biological process||regulation of cellular process||biological regulation||regulation of biological quality			GO:0016491||GO:0050660||GO:0003674||GO:0003824||GO:0000166||GO:0005488||GO:0036094||GO:0043167||GO:0043168||GO:0048037||GO:0050662||GO:0097159||GO:1901265||GO:1901363	oxidoreductase activity||flavin adenine dinucleotide binding||molecular_function||catalytic activity||nucleotide binding||binding||small molecule binding||ion binding||anion binding||cofactor binding||coenzyme binding||organic cyclic compound binding||nucleoside phosphate binding||heterocyclic compound binding	pti00010||pti00020||pti00260||pti00280||pti00310||pti00380||pti00620||pti00630||pti00640||pti01100||pti01110||pti01200	Glycolysis / Gluconeogenesis||Citrate cycle (TCA cycle)||Glycine, serine and threonine metabolism||Valine, leucine and isoleucine degradation||Lysine degradation||Tryptophan metabolism||Pyruvate metabolism||Glyoxylate and dicarboxylate metabolism||Propanoate metabolism||Metabolic pathways||Biosynthesis of secondary metabolites||Carbon metabolism
7196241	-1.34265	4.52258e-08	3.5494e-06	-1.32345	1.74173e-08	3.70342e-07	CRTISO5	NC_011669.1	1892763	1894441	+	1590	protein_coding	CRTISO5 carotenoid isomerase 5%2Cphytoene dehydrogenase-related protein && Q8S4R4.1 RecName: Full=Prolycopene isomerase, chloroplastic; Short=CrtISO; AltName: Full=Carotenoid isomerase; AltName: Full=Protein tangerine; Flags: Precursor && PF13450:NAD(P)-binding Rossmann-like domain	-	GO:0055114||GO:0008152||GO:0008150	oxidation-reduction process||metabolic process||biological_process			GO:0016491||GO:0003674||GO:0003824	oxidoreductase activity||molecular_function||catalytic activity	--	--
7202622	-1.45818	2.47628e-08	2.11309e-06	-1.50187	4.64759e-10	1.34418e-08	PHATRDRAFT_47550	NC_011682.1	89184	90542	+	1359	protein_coding	predicted protein && Q827H4.1 RecName: Full=Monomeric sarcosine oxidase; Short=MSOX && PF01266:FAD dependent oxidoreductase	DAO	GO:0055114||GO:0008152||GO:0008150	oxidation-reduction process||metabolic process||biological_process			GO:0016491||GO:0003674||GO:0003824	oxidoreductase activity||molecular_function||catalytic activity	--	--
7198790	-1.86541	3.08884e-07	1.67733e-05	-3.69404	2.60549e-26	5.96436e-24	PHATRDRAFT_16540	NC_011694.1	165042	166337	-	1296	protein_coding	predicted protein && P43353.1 RecName: Full=Aldehyde dehydrogenase family 3 member B1; AltName: Full=Aldehyde dehydrogenase 7; Flags: Precursor && PF00171:Aldehyde dehydrogenase family	Aldedh	GO:0008152||GO:0055114||GO:0008150	metabolic process||oxidation-reduction process||biological_process			GO:0016491||GO:0003674||GO:0003824	oxidoreductase activity||molecular_function||catalytic activity	pti00010||pti00340||pti00350||pti00360||pti00410||pti01100||pti01110	Glycolysis / Gluconeogenesis||Histidine metabolism||Tyrosine metabolism||Phenylalanine metabolism||beta-Alanine metabolism||Metabolic pathways||Biosynthesis of secondary metabolites
7195414	-2.1431	4.66451e-08	3.60812e-06	-3.53	4.10355e-09	1.00114e-07	PHATRDRAFT_15683	NC_011688.1	366610	367359	-	750	protein_coding	predicted protein && - && PF00175:Oxidoreductase NAD-binding domain	NAD_binding_1	GO:0055114||GO:0008152||GO:0008150	oxidation-reduction process||metabolic process||biological_process			GO:0016491||GO:0003674||GO:0003824	oxidoreductase activity||molecular_function||catalytic activity	--	--
7202809	-2.50864	2.76505e-09	3.06493e-07	-2.00106	0.000592116	0.00375402	PHATRDRAFT_47593	NC_011682.1	213921	215912	-	1992	protein_coding	predicted protein && - && PF04116:Fatty acid hydroxylase superfamily	-	GO:0006633||GO:0055114||GO:0008152||GO:0006082||GO:0006629||GO:0006631||GO:0008150||GO:0008610||GO:0009058||GO:0009987||GO:0016053||GO:0019752||GO:0032787||GO:0043436||GO:0044237||GO:0044238||GO:0044249||GO:0044255||GO:0044281||GO:0044283||GO:0046394||GO:0071704||GO:0072330||GO:1901576	fatty acid biosynthetic process||oxidation-reduction process||metabolic process||organic acid metabolic process||lipid metabolic process||fatty acid metabolic process||biological_process||lipid biosynthetic process||biosynthetic process||cellular process||organic acid biosynthetic process||carboxylic acid metabolic process||monocarboxylic acid metabolic process||oxoacid metabolic process||cellula…			GO:0005506||GO:0016491||GO:0003674||GO:0005488||GO:0046872||GO:0043167||GO:0043169||GO:0046914||GO:0003824	iron ion binding||oxidoreductase activity||molecular_function||binding||metal ion binding||ion binding||cation binding||transition metal ion binding||catalytic activity	--	--

## Sheet: Table S9
Table S9 DEGs inovled in biosynthesis of secondary metabolites
7201664	3.27904	6.17845e-10	8.30383e-08	9.036	4.63675e-05	0.000413655	PHATRDRAFT_8155	NC_011678.1	283257	283562	+	306	protein_coding	predicted protein && P22944.2 RecName: Full=Nitrite reductase [NAD(P)H] && PF13806:Rieske-like [2Fe-2S] domain	-	GO:0042128||GO:0055114||GO:0008152||GO:0006082||GO:0006807||GO:0008150||GO:0009987||GO:0042126||GO:0043436||GO:0044237||GO:0044281||GO:0071704||GO:0071941||GO:2001057	nitrate assimilation||oxidation-reduction process||metabolic process||organic acid metabolic process||nitrogen compound metabolic process||biological_process||cellular process||nitrate metabolic process||oxoacid metabolic process||cellular metabolic process||small molecule metabolic process||organic substance metabolic process||nitrogen cycle metabolic process||reactive nitrogen species metabolic…			GO:0008942||GO:0016491||GO:0051537||GO:0003674||GO:0003824||GO:0016661||GO:0046857||GO:0098809||GO:0005488||GO:0048037||GO:0051536||GO:0051540	nitrite reductase [NAD(P)H] activity||oxidoreductase activity||2 iron, 2 sulfur cluster binding||molecular_function||catalytic activity||oxidoreductase activity, acting on other nitrogenous compounds as donors||oxidoreductase activity, acting on other nitrogenous compounds as donors, with NAD or NADP as acceptor||nitrite reductase activity||binding||cofactor binding||iron-sulfur cluster binding||…	--	--
7195287	1.51995	0.0691959	0.210901	5.03722	4.07898e-07	6.1898e-06	PHATRDRAFT_54983	NC_011688.1	363350	366343	+	2851	protein_coding	predicted protein && P39869.1 RecName: Full=Nitrate reductase [NADH]; Short=NR && PF00970:Oxidoreductase FAD-binding domain|PF00174:Oxidoreductase molybdopterin binding domain|PF00175:Oxidoreductase NAD-binding domain|PF00173:Cytochrome b5-like Heme/Steroid binding domain|PF03404:Mo-co oxidoreductase dimerisation domain	FAD_binding_6	GO:0042128||GO:0055114||GO:0008152||GO:0006082||GO:0006807||GO:0008150||GO:0009987||GO:0042126||GO:0043436||GO:0044237||GO:0044281||GO:0071704||GO:0071941||GO:2001057	nitrate assimilation||oxidation-reduction process||metabolic process||organic acid metabolic process||nitrogen compound metabolic process||biological_process||cellular process||nitrate metabolic process||oxoacid metabolic process||cellular metabolic process||small molecule metabolic process||organic substance metabolic process||nitrogen cycle metabolic process||reactive nitrogen species metabolic…			GO:0016491||GO:0030151||GO:0003674||GO:0003824||GO:0005488||GO:0046872||GO:0043167||GO:0043169||GO:0046914	oxidoreductase activity||molybdenum ion binding||molecular_function||catalytic activity||binding||metal ion binding||ion binding||cation binding||transition metal ion binding	pti00910||pti01100	Nitrogen metabolism||Metabolic pathways
7203160	2.13958	6.93646e-05	0.00145099	4.14758	5.42855e-18	5.12331e-16	PHATRDRAFT_51092	NC_011683.1	372220	373582	+	1251	protein_coding	predicted protein && O22506.1 RecName: Full=Glutamine synthetase, chloroplastic; AltName: Full=GS2; AltName: Full=Glutamate--ammonia ligase; Flags: Precursor && PF00120:Glutamine synthetase, catalytic domain|PF03951:Glutamine synthetase, beta-Grasp domain	-	GO:0006807||GO:0006542||GO:0008152||GO:0008150||GO:0006082||GO:0006520||GO:0006541||GO:0008652||GO:0009058||GO:0009064||GO:0009084||GO:0009987||GO:0016053||GO:0019752||GO:0043436||GO:0044237||GO:0044238||GO:0044249||GO:0044281||GO:0044283||GO:0046394||GO:0071704||GO:1901564||GO:1901566||GO:1901576||GO:1901605||GO:1901607	nitrogen compound metabolic process||glutamine biosynthetic process||metabolic process||biological_process||organic acid metabolic process||cellular amino acid metabolic process||glutamine metabolic process||cellular amino acid biosynthetic process||biosynthetic process||glutamine family amino acid metabolic process||glutamine family amino acid biosynthetic process||cellular process||organic acid…			GO:0004356||GO:0003674||GO:0003824||GO:0016211||GO:0016874||GO:0016879||GO:0016880	glutamate-ammonia ligase activity||molecular_function||catalytic activity||ammonia ligase activity||ligase activity||ligase activity, forming carbon-nitrogen bonds||acid-ammonia (or amide) ligase activity	pti00220||pti00250||pti00630||pti00910||pti01100||pti01230	Arginine biosynthesis||Alanine, aspartate and glutamate metabolism||Glyoxylate and dicarboxylate metabolism||Nitrogen metabolism||Metabolic pathways||Biosynthesis of amino acids
7197236	0.925499	0.0464512	0.164236	3.82443	4.47382e-15	2.9172e-13	PHATRDRAFT_18337	NC_011670.1	1197770	1200001	+	2156	protein_coding	predicted protein && P49078.2 RecName: Full=Asparagine synthetase [glutamine-hydrolyzing] 1; AltName: Full=Glutamine-dependent asparagine synthetase 1; AltName: Full=Protein DARK INDUCIBLE 6 && PF13537:Glutamine amidotransferase domain|PF00733:Asparagine synthase	-	GO:0006529||GO:0008152||GO:0006082||GO:0006520||GO:0006528||GO:0006807||GO:0008150||GO:0008652||GO:0009058||GO:0009066||GO:0009067||GO:0009987||GO:0016053||GO:0019752||GO:0032787||GO:0034641||GO:0043436||GO:0043603||GO:0043604||GO:0044237||GO:0044238||GO:0044249||GO:0044271||GO:0044281||GO:0044283||GO:0046394||GO:0071704||GO:0072330||GO:1901564||GO:1901566||GO:1901576||GO:1901605||GO:1901607	asparagine biosynthetic process||metabolic process||organic acid metabolic process||cellular amino acid metabolic process||asparagine metabolic process||nitrogen compound metabolic process||biological_process||cellular amino acid biosynthetic process||biosynthetic process||aspartate family amino acid metabolic process||aspartate family amino acid biosynthetic process||cellular process||organic ac…			GO:0004066||GO:0003674||GO:0003824||GO:0016874||GO:0016879||GO:0016884	asparagine synthase (glutamine-hydrolyzing) activity||molecular_function||catalytic activity||ligase activity||ligase activity, forming carbon-nitrogen bonds||carbon-nitrogen ligase activity, with glutamine as amido-N-donor	pti00250||pti01100||pti01110||pti01230	Alanine, aspartate and glutamate metabolism||Metabolic pathways||Biosynthesis of secondary metabolites||Biosynthesis of amino acids
7204128	-0.401833	NA	1	2.68466	0.0203218	0.0670406	HemF_2	NC_011671.1	1340236	1341114	-	879	protein_coding	coproporphyrinogen oxidase. coproporphyrinogen III oxidase. coproporphyrinogenase && P35055.1 RecName: Full=Oxygen-dependent coproporphyrinogen-III oxidase, chloroplastic; Short=Coprogen oxidase; Short=Coproporphyrinogenase; Flags: Precursor && PF01218:Coproporphyrinogen III oxidase	-	GO:0006779||GO:0055114||GO:0008152||GO:0006725||GO:0006778||GO:0006807||GO:0008150||GO:0009058||GO:0009987||GO:0018130||GO:0019438||GO:0033013||GO:0033014||GO:0034641||GO:0044237||GO:0044249||GO:0044271||GO:0046483||GO:0051186||GO:0051188||GO:0071704||GO:1901360||GO:1901362||GO:1901564||GO:1901566||GO:1901576	porphyrin-containing compound biosynthetic process||oxidation-reduction process||metabolic process||cellular aromatic compound metabolic process||porphyrin-containing compound metabolic process||nitrogen compound metabolic process||biological_process||biosynthetic process||cellular process||heterocycle biosynthetic process||aromatic compound biosynthetic process||tetrapyrrole metabolic process||t…			GO:0004109||GO:0003674||GO:0003824||GO:0016491||GO:0016627||GO:0016634	coproporphyrinogen oxidase activity||molecular_function||catalytic activity||oxidoreductase activity||oxidoreductase activity, acting on the CH-CH group of donors||oxidoreductase activity, acting on the CH-CH group of donors, oxygen as acceptor	pti00860||pti01100||pti01110	Porphyrin and chlorophyll metabolism||Metabolic pathways||Biosynthesis of secondary metabolites
7201060	1.51213	0.000179332	0.0030365	2.64852	6.82821e-09	1.59359e-07	PK4a	NC_011676.1	912856	914986	+	1783	protein_coding	kinase pyruvate kinase 4a && Q42806.1 RecName: Full=Pyruvate kinase, cytosolic isozyme; Short=PK && PF02887:Pyruvate kinase, alpha/beta domain|PF00224:Pyruvate kinase, barrel domain	PK	GO:0006096||GO:0008152||GO:0005975||GO:0006082||GO:0006090||GO:0006091||GO:0006139||GO:0006163||GO:0006164||GO:0006165||GO:0006725||GO:0006732||GO:0006733||GO:0006753||GO:0006754||GO:0006757||GO:0006793||GO:0006796||GO:0006807||GO:0008150||GO:0009056||GO:0009058||GO:0009108||GO:0009117||GO:0009123||GO:0009124||GO:0009126||GO:0009127||GO:0009132||GO:0009135||GO:0009141||GO:0009142||GO:0009144||GO:…	glycolytic process||metabolic process||carbohydrate metabolic process||organic acid metabolic process||pyruvate metabolic process||generation of precursor metabolites and energy||nucleobase-containing compound metabolic process||purine nucleotide metabolic process||purine nucleotide biosynthetic process||nucleoside diphosphate phosphorylation||cellular aromatic compound metabolic process||coenzym…			GO:0000287||GO:0004743||GO:0030955||GO:0003824||GO:0003674||GO:0005488||GO:0046872||GO:0043167||GO:0043169||GO:0016740||GO:0016772||GO:0016773||GO:0031420	magnesium ion binding||pyruvate kinase activity||potassium ion binding||catalytic activity||molecular_function||binding||metal ion binding||ion binding||cation binding||transferase activity||transferase activity, transferring phosphorus-containing groups||phosphotransferase activity, alcohol group as acceptor||alkali metal ion binding	--	--
7201774	0.945337	0.00243564	0.021878	2.12526	1.33012e-19	1.59008e-17	FSA	NC_011678.1	231990	232894	+	905	protein_coding	aldolase fructose-6-phosphate-aldolase && B2V7E1.1 RecName: Full=Probable transaldolase && PF00923:Transaldolase	-	GO:0005975||GO:0008152||GO:0008150||GO:0044238||GO:0071704	carbohydrate metabolic process||metabolic process||biological_process||primary metabolic process||organic substance metabolic process					pti00030||pti01100||pti01110||pti01200||pti01230	Pentose phosphate pathway||Metabolic pathways||Biosynthesis of secondary metabolites||Carbon metabolism||Biosynthesis of amino acids
7196929	1.92074	1.94659e-07	1.15634e-05	2.09938	5.23672e-05	0.00046031	PHATRDRAFT_43183	NC_011669.1	2258634	2260449	-	1816	protein_coding	predicted protein && Q9C5J6.1 RecName: Full=tRNA dimethylallyltransferase 9; AltName: Full=Isopentenyl-diphosphate: tRNA isopentenyltransferase 9; Short=AtIPT9; Short=IPP transferase 9; Short=IPPT 9 && PF01715:IPP transferase	IPPT	GO:0008033||GO:0008152||GO:0006139||GO:0006396||GO:0006399||GO:0006725||GO:0006807||GO:0008150||GO:0009987||GO:0010467||GO:0016070||GO:0034470||GO:0034641||GO:0034660||GO:0043170||GO:0044237||GO:0044238||GO:0046483||GO:0071704||GO:0090304||GO:1901360	tRNA processing||metabolic process||nucleobase-containing compound metabolic process||RNA processing||tRNA metabolic process||cellular aromatic compound metabolic process||nitrogen compound metabolic process||biological_process||cellular process||gene expression||RNA metabolic process||ncRNA processing||cellular nitrogen compound metabolic process||ncRNA metabolic process||macromolecule metabolic…					pti01100||pti01110	Metabolic pathways||Biosynthesis of secondary metabolites
7201064	1.67385	3.08659e-06	0.000116856	2.04145	6.37873e-14	3.41437e-12	PK4b	NC_011676.1	927538	929753	+	2052	protein_coding	kinase pyruvate kinase 4b && Q42806.1 RecName: Full=Pyruvate kinase, cytosolic isozyme; Short=PK && PF00224:Pyruvate kinase, barrel domain|PF02887:Pyruvate kinase, alpha/beta domain	PK	GO:0006096||GO:0008152||GO:0005975||GO:0006082||GO:0006090||GO:0006091||GO:0006139||GO:0006163||GO:0006164||GO:0006165||GO:0006725||GO:0006732||GO:0006733||GO:0006753||GO:0006754||GO:0006757||GO:0006793||GO:0006796||GO:0006807||GO:0008150||GO:0009056||GO:0009058||GO:0009108||GO:0009117||GO:0009123||GO:0009124||GO:0009126||GO:0009127||GO:0009132||GO:0009135||GO:0009141||GO:0009142||GO:0009144||GO:…	glycolytic process||metabolic process||carbohydrate metabolic process||organic acid metabolic process||pyruvate metabolic process||generation of precursor metabolites and energy||nucleobase-containing compound metabolic process||purine nucleotide metabolic process||purine nucleotide biosynthetic process||nucleoside diphosphate phosphorylation||cellular aromatic compound metabolic process||coenzym…			GO:0003824||GO:0000287||GO:0004743||GO:0030955||GO:0003674||GO:0005488||GO:0046872||GO:0043167||GO:0043169||GO:0016740||GO:0016772||GO:0016773||GO:0031420	catalytic activity||magnesium ion binding||pyruvate kinase activity||potassium ion binding||molecular_function||binding||metal ion binding||ion binding||cation binding||transferase activity||transferase activity, transferring phosphorus-containing groups||phosphotransferase activity, alcohol group as acceptor||alkali metal ion binding	--	--
7196856	1.10981	9.25976e-06	0.000288583	2.03667	1.18641e-14	7.1711e-13	PHATRDRAFT_32202	NC_011669.1	1939057	1940579	+	1458	protein_coding	predicted protein && Q8YPW9.1 RecName: Full=Lysine--tRNA ligase; AltName: Full=Lysyl-tRNA synthetase; Short=LysRS && PF01336:OB-fold nucleic acid binding domain|PF00152:tRNA synthetases class II (D, K and N)	tRNA-synt_2	GO:0006418||GO:0008152||GO:0006082||GO:0006139||GO:0006399||GO:0006412||GO:0006518||GO:0006520||GO:0006725||GO:0006807||GO:0008150||GO:0009058||GO:0009059||GO:0009987||GO:0010467||GO:0016070||GO:0019538||GO:0019752||GO:0034641||GO:0034645||GO:0034660||GO:0043038||GO:0043039||GO:0043043||GO:0043170||GO:0043436||GO:0043603||GO:0043604||GO:0044237||GO:0044238||GO:0044249||GO:0044260||GO:0044267||GO:…	tRNA aminoacylation for protein translation||metabolic process||organic acid metabolic process||nucleobase-containing compound metabolic process||tRNA metabolic process||translation||peptide metabolic process||cellular amino acid metabolic process||cellular aromatic compound metabolic process||nitrogen compound metabolic process||biological_process||biosynthetic process||macromolecule biosyntheti…			GO:0003676||GO:0000166||GO:0004812||GO:0005524||GO:0003674||GO:0005488||GO:0097159||GO:1901363||GO:0036094||GO:1901265||GO:0003824||GO:0016874||GO:0016875||GO:0140098||GO:0140101||GO:0008144||GO:0017076||GO:0030554||GO:0032553||GO:0032555||GO:0032559||GO:0035639||GO:0043167||GO:0043168||GO:0097367	nucleic acid binding||nucleotide binding||aminoacyl-tRNA ligase activity||ATP binding||molecular_function||binding||organic cyclic compound binding||heterocyclic compound binding||small molecule binding||nucleoside phosphate binding||catalytic activity||ligase activity||ligase activity, forming carbon-oxygen bonds||catalytic activity, acting on RNA||catalytic activity, acting on a tRNA||drug bind…	pti00970	Aminoacyl-tRNA biosynthesis
7202332	2.71848	1.1623e-13	3.47139e-11	1.99808	5.12422e-21	7.55225e-19	PHATRDRAFT_13951	NC_011681.1	236291	237707	+	1353	protein_coding	predicted protein && P15111.2 RecName: Full=NADP-specific glutamate dehydrogenase; Short=NADP-GDH && PF02812:Glu/Leu/Phe/Val dehydrogenase, dimerisation domain|PF00208:Glutamate/Leucine/Phenylalanine/Valine dehydrogenase	-	GO:0006520||GO:0055114||GO:0008152||GO:0006082||GO:0006807||GO:0008150||GO:0009987||GO:0019752||GO:0043436||GO:0044237||GO:0044238||GO:0044281||GO:0071704||GO:1901564	cellular amino acid metabolic process||oxidation-reduction process||metabolic process||organic acid metabolic process||nitrogen compound metabolic process||biological_process||cellular process||carboxylic acid metabolic process||oxoacid metabolic process||cellular metabolic process||primary metabolic process||small molecule metabolic process||organic substance metabolic process||organonitrogen co…			GO:0016491||GO:0003674||GO:0003824	oxidoreductase activity||molecular_function||catalytic activity	pti00220||pti00250||pti00910||pti01100	Arginine biosynthesis||Alanine, aspartate and glutamate metabolism||Nitrogen metabolism||Metabolic pathways
7197893	0.932058	0.00391037	0.0308695	1.9566	1.51456e-15	1.04456e-13	PHATRDRAFT_10757	NC_011672.1	1262913	1264130	+	1038	protein_coding	predicted protein && Q55512.2 RecName: Full=Aspartate-semialdehyde dehydrogenase; Short=ASA dehydrogenase; Short=ASADH; AltName: Full=Aspartate-beta-semialdehyde dehydrogenase && PF01118:Semialdehyde dehydrogenase, NAD binding domain|PF02774:Semialdehyde dehydrogenase, dimerisation domain	-	GO:0055114||GO:0008652||GO:0008152||GO:0008150||GO:0006082||GO:0006520||GO:0006807||GO:0009058||GO:0009987||GO:0016053||GO:0019752||GO:0043436||GO:0044237||GO:0044238||GO:0044249||GO:0044281||GO:0044283||GO:0046394||GO:0071704||GO:1901564||GO:1901566||GO:1901576	oxidation-reduction process||cellular amino acid biosynthetic process||metabolic process||biological_process||organic acid metabolic process||cellular amino acid metabolic process||nitrogen compound metabolic process||biosynthetic process||cellular process||organic acid biosynthetic process||carboxylic acid metabolic process||oxoacid metabolic process||cellular metabolic process||primary metaboli…	GO:0005737||GO:0005622||GO:0005575||GO:0005623||GO:0044424||GO:0044464	cytoplasm||intracellular||cellular_component||cell||intracellular part||cell part	GO:0016620||GO:0051287||GO:0003942||GO:0046983||GO:0003674||GO:0003824||GO:0016491||GO:0016903||GO:0000166||GO:0005488||GO:0036094||GO:0048037||GO:0050662||GO:0097159||GO:1901265||GO:1901363||GO:0005515	oxidoreductase activity, acting on the aldehyde or oxo group of donors, NAD or NADP as acceptor||NAD binding||N-acetyl-gamma-glutamyl-phosphate reductase activity||protein dimerization activity||molecular_function||catalytic activity||oxidoreductase activity||oxidoreductase activity, acting on the aldehyde or oxo group of donors||nucleotide binding||binding||small molecule binding||cofactor bindi…	--	--
7200088	1.44696	0.0031049	0.0261424	1.92373	0.00011875	0.000939203	PHATRDRAFT_26813	NC_011674.1	457684	459213	-	1403	protein_coding	predicted protein && P52985.1 RecName: Full=Homoserine dehydrogenase; Short=HDH && PF03447:Homoserine dehydrogenase, NAD binding domain|PF00742:Homoserine dehydrogenase	-	GO:0055114||GO:0006520||GO:0008152||GO:0008150||GO:0006082||GO:0006807||GO:0009987||GO:0019752||GO:0043436||GO:0044237||GO:0044238||GO:0044281||GO:0071704||GO:1901564	oxidation-reduction process||cellular amino acid metabolic process||metabolic process||biological_process||organic acid metabolic process||nitrogen compound metabolic process||cellular process||carboxylic acid metabolic process||oxoacid metabolic process||cellular metabolic process||primary metabolic process||small molecule metabolic process||organic substance metabolic process||organonitrogen co…			GO:0016491||GO:0050661||GO:0003674||GO:0003824||GO:0000166||GO:0005488||GO:0036094||GO:0048037||GO:0050662||GO:0097159||GO:1901265||GO:1901363	oxidoreductase activity||NADP binding||molecular_function||catalytic activity||nucleotide binding||binding||small molecule binding||cofactor binding||coenzyme binding||organic cyclic compound binding||nucleoside phosphate binding||heterocyclic compound binding	--	--
7203602	1.1231	5.16737e-06	0.000178076	1.85042	1.57542e-21	2.52984e-19	PEPCase_2	NC_011685.1	403161	406016	+	2741	protein_coding	predicted protein && A4XXP6.1 RecName: Full=Phosphoenolpyruvate carboxylase; Short=PEPC; Short=PEPCase && PF00311:Phosphoenolpyruvate carboxylase	-	GO:0006099||GO:0015977||GO:0008152||GO:0006082||GO:0006091||GO:0006101||GO:0055114||GO:0008150||GO:0009060||GO:0009987||GO:0015980||GO:0016999||GO:0017144||GO:0019752||GO:0043436||GO:0044237||GO:0044238||GO:0044281||GO:0045333||GO:0071704||GO:0072350	tricarboxylic acid cycle||carbon fixation||metabolic process||organic acid metabolic process||generation of precursor metabolites and energy||citrate metabolic process||oxidation-reduction process||biological_process||aerobic respiration||cellular process||energy derivation by oxidation of organic compounds||antibiotic metabolic process||drug metabolic process||carboxylic acid metabolic process||…			GO:0003824||GO:0008964||GO:0003674||GO:0004611||GO:0016829||GO:0016830||GO:0016831	catalytic activity||phosphoenolpyruvate carboxylase activity||molecular_function||phosphoenolpyruvate carboxykinase activity||lyase activity||carbon-carbon lyase activity||carboxy-lyase activity	pti00620||pti00710||pti01100||pti01200	Pyruvate metabolism||Carbon fixation in photosynthetic organisms||Metabolic pathways||Carbon metabolism
7203533	0.583662	0.177381	0.375064	1.78618	0.000101945	0.000820982	PHATRDRAFT_38631	NC_011684.1	568020	568914	+	837	protein_coding	6-phosphogluconolactonase && - && PF01182:Glucosamine-6-phosphate isomerases/6-phosphogluconolactonase	-	GO:0005975||GO:0008152||GO:0008150||GO:0044238||GO:0071704	carbohydrate metabolic process||metabolic process||biological_process||primary metabolic process||organic substance metabolic process					pti00030||pti01100||pti01110||pti01200	Pentose phosphate pathway||Metabolic pathways||Biosynthesis of secondary metabolites||Carbon metabolism
7202968	1.95453	1.38559e-09	1.67392e-07	1.6479	5.19178e-20	6.812e-18	PHATRDRAFT_51088	NC_011683.1	169286	171547	+	2080	protein_coding	predicted protein && A8NR45.1 RecName: Full=Isocitrate lyase; Short=ICL; Short=Isocitrase; Short=Isocitratase; AltName: Full=Methylisocitrate lyase; Short=MICA; AltName: Full=Threo-D(S)-isocitrate glyoxylate-lyase && PF00463:Isocitrate lyase family	-	GO:0019752||GO:0008152||GO:0006082||GO:0008150||GO:0009987||GO:0043436||GO:0044237||GO:0044281||GO:0071704	carboxylic acid metabolic process||metabolic process||organic acid metabolic process||biological_process||cellular process||oxoacid metabolic process||cellular metabolic process||small molecule metabolic process||organic substance metabolic process			GO:0004451||GO:0003824||GO:0003674||GO:0016829||GO:0016830||GO:0016833	isocitrate lyase activity||catalytic activity||molecular_function||lyase activity||carbon-carbon lyase activity||oxo-acid-lyase activity	pti00630||pti01100||pti01110||pti01200	Glyoxylate and dicarboxylate metabolism||Metabolic pathways||Biosynthesis of secondary metabolites||Carbon metabolism
7198576	1.13815	0.00723483	0.0480772	1.64026	6.55202e-07	9.52611e-06	PHATRDRAFT_23547	NC_011693.1	78094	79692	+	1599	protein_coding	predicted protein && Q9M1R2.1 RecName: Full=Proline--tRNA ligase, cytoplasmic; AltName: Full=Prolyl-tRNA synthetase; Short=ProRS && PF00587:tRNA synthetase class II core domain (G, H, P, S and T)|PF09180:Prolyl-tRNA synthetase, C-terminal|PF03129:Anticodon binding domain	HGTP_anticodon	GO:0006418||GO:0006433||GO:0008152||GO:0006082||GO:0006139||GO:0006399||GO:0006412||GO:0006518||GO:0006520||GO:0006725||GO:0006807||GO:0008150||GO:0009058||GO:0009059||GO:0009987||GO:0010467||GO:0016070||GO:0019538||GO:0019752||GO:0034641||GO:0034645||GO:0034660||GO:0043038||GO:0043039||GO:0043043||GO:0043170||GO:0043436||GO:0043603||GO:0043604||GO:0044237||GO:0044238||GO:0044249||GO:0044260||GO:…	tRNA aminoacylation for protein translation||prolyl-tRNA aminoacylation||metabolic process||organic acid metabolic process||nucleobase-containing compound metabolic process||tRNA metabolic process||translation||peptide metabolic process||cellular amino acid metabolic process||cellular aromatic compound metabolic process||nitrogen compound metabolic process||biological_process||biosynthetic proces…	GO:0005737||GO:0005622||GO:0005575||GO:0005623||GO:0044424||GO:0044464	cytoplasm||intracellular||cellular_component||cell||intracellular part||cell part	GO:0000166||GO:0004812||GO:0005524||GO:0004827||GO:0003674||GO:0005488||GO:0036094||GO:0097159||GO:1901265||GO:1901363||GO:0003824||GO:0016874||GO:0016875||GO:0140098||GO:0140101||GO:0008144||GO:0017076||GO:0030554||GO:0032553||GO:0032555||GO:0032559||GO:0035639||GO:0043167||GO:0043168||GO:0097367	nucleotide binding||aminoacyl-tRNA ligase activity||ATP binding||proline-tRNA ligase activity||molecular_function||binding||small molecule binding||organic cyclic compound binding||nucleoside phosphate binding||heterocyclic compound binding||catalytic activity||ligase activity||ligase activity, forming carbon-oxygen bonds||catalytic activity, acting on RNA||catalytic activity, acting on a tRNA||d…	pti00970	Aminoacyl-tRNA biosynthesis
7197474	1.12675	0.00658499	0.0450416	1.62816	4.25247e-06	5.11763e-05	PHATRDRAFT_10025	NC_011670.1	925451	926419	+	888	protein_coding	predicted protein && Q99145.1 RecName: Full=ATP phosphoribosyltransferase; Short=ATP-PRT; Short=ATP-PRTase && PF08029:HisG, C-terminal domain|PF01634:ATP phosphoribosyltransferase	-	GO:0000105||GO:0008152||GO:0006082||GO:0006520||GO:0006547||GO:0006725||GO:0006807||GO:0008150||GO:0008652||GO:0009058||GO:0009987||GO:0016053||GO:0018130||GO:0019438||GO:0019752||GO:0034641||GO:0043436||GO:0044237||GO:0044238||GO:0044249||GO:0044281||GO:0044283||GO:0046394||GO:0046483||GO:0052803||GO:0071704||GO:1901360||GO:1901362||GO:1901564||GO:1901566||GO:1901576||GO:1901605||GO:1901607	histidine biosynthetic process||metabolic process||organic acid metabolic process||cellular amino acid metabolic process||histidine metabolic process||cellular aromatic compound metabolic process||nitrogen compound metabolic process||biological_process||cellular amino acid biosynthetic process||biosynthetic process||cellular process||organic acid biosynthetic process||heterocycle biosynthetic pro…	GO:0005737||GO:0005622||GO:0005575||GO:0005623||GO:0044424||GO:0044464	cytoplasm||intracellular||cellular_component||cell||intracellular part||cell part	GO:0000287||GO:0003879||GO:0003674||GO:0005488||GO:0046872||GO:0043167||GO:0043169||GO:0003824||GO:0016740||GO:0016757||GO:0016763	magnesium ion binding||ATP phosphoribosyltransferase activity||molecular_function||binding||metal ion binding||ion binding||cation binding||catalytic activity||transferase activity||transferase activity, transferring glycosyl groups||transferase activity, transferring pentosyl groups	pti00340||pti01100||pti01110||pti01230	Histidine metabolism||Metabolic pathways||Biosynthesis of secondary metabolites||Biosynthesis of amino acids
7201964	0.925584	4.7698e-05	0.00108654	1.59467	1.21582e-15	8.49419e-14	NDK2	NC_011680.1	751017	751735	-	447	protein_coding	nucleoside diphosphate kinase 2 && Q9UUY8.2 RecName: Full=Nucleoside diphosphate kinase; Short=NDK; Short=NDP kinase && PF00334:Nucleoside diphosphate kinase	NDK	GO:0006165||GO:0006183||GO:0006228||GO:0006241||GO:0008152||GO:0006139||GO:0006725||GO:0006753||GO:0006793||GO:0006796||GO:0006807||GO:0008150||GO:0009117||GO:0009132||GO:0009987||GO:0016310||GO:0019637||GO:0034641||GO:0044237||GO:0044238||GO:0044281||GO:0046483||GO:0046939||GO:0055086||GO:0071704||GO:1901360||GO:0006163||GO:0042278||GO:0006164||GO:0009058||GO:0009116||GO:0009119||GO:0009141||GO:…	nucleoside diphosphate phosphorylation||GTP biosynthetic process||UTP biosynthetic process||CTP biosynthetic process||metabolic process||nucleobase-containing compound metabolic process||cellular aromatic compound metabolic process||nucleoside phosphate metabolic process||phosphorus metabolic process||phosphate-containing compound metabolic process||nitrogen compound metabolic process||biological…			GO:0004550||GO:0003674||GO:0003824||GO:0016301||GO:0016740||GO:0016772||GO:0016776||GO:0019205	nucleoside diphosphate kinase activity||molecular_function||catalytic activity||kinase activity||transferase activity||transferase activity, transferring phosphorus-containing groups||phosphotransferase activity, phosphate group as acceptor||nucleobase-containing compound kinase activity	pti00230||pti00240||pti01100||pti01110	Purine metabolism||Pyrimidine metabolism||Metabolic pathways||Biosynthesis of secondary metabolites
7199817	1.0372	0.000951201	0.0109971	1.56985	2.45543e-13	1.21742e-11	PHATRDRAFT_44902	NC_011673.1	596687	598262	-	1473	protein_coding	predicted protein && A6LI95.1 RecName: Full=Aspartate--ammonia ligase; AltName: Full=Asparagine synthetase A && PF03590:Aspartate-ammonia ligase	-	GO:0006529||GO:0008152||GO:0006082||GO:0006520||GO:0006528||GO:0006807||GO:0008150||GO:0008652||GO:0009058||GO:0009066||GO:0009067||GO:0009987||GO:0016053||GO:0019752||GO:0032787||GO:0034641||GO:0043436||GO:0043603||GO:0043604||GO:0044237||GO:0044238||GO:0044249||GO:0044271||GO:0044281||GO:0044283||GO:0046394||GO:0071704||GO:0072330||GO:1901564||GO:1901566||GO:1901576||GO:1901605||GO:1901607	asparagine biosynthetic process||metabolic process||organic acid metabolic process||cellular amino acid metabolic process||asparagine metabolic process||nitrogen compound metabolic process||biological_process||cellular amino acid biosynthetic process||biosynthetic process||aspartate family amino acid metabolic process||aspartate family amino acid biosynthetic process||cellular process||organic ac…	GO:0005737||GO:0005622||GO:0005575||GO:0005623||GO:0044424||GO:0044464	cytoplasm||intracellular||cellular_component||cell||intracellular part||cell part	GO:0004071||GO:0003674||GO:0003824||GO:0016211||GO:0016874||GO:0016879||GO:0016880	aspartate-ammonia ligase activity||molecular_function||catalytic activity||ammonia ligase activity||ligase activity||ligase activity, forming carbon-nitrogen bonds||acid-ammonia (or amide) ligase activity	pti00250||pti00460||pti01100||pti01110||pti01230	Alanine, aspartate and glutamate metabolism||Cyanoamino acid metabolism||Metabolic pathways||Biosynthesis of secondary metabolites||Biosynthesis of amino acids
7198894	1.51218	1.59102e-07	9.88826e-06	1.49723	5.63155e-12	2.2334e-10	PHATRDRAFT_30967	NC_011695.1	364401	366964	-	2261	protein_coding	predicted protein && Q01292.1 RecName: Full=Ketol-acid reductoisomerase, chloroplastic; AltName: Full=Acetohydroxy-acid reductoisomerase; AltName: Full=Alpha-keto-beta-hydroxylacyl reductoisomerase; Flags: Precursor && PF07991:Acetohydroxy acid isomeroreductase, NADPH-binding domain|PF01450:Acetohydroxy acid isomeroreductase, catalytic domain	-	GO:0009082||GO:0055114||GO:0008152||GO:0006082||GO:0006520||GO:0006807||GO:0008150||GO:0008652||GO:0009058||GO:0009081||GO:0009987||GO:0016053||GO:0019752||GO:0043436||GO:0044237||GO:0044238||GO:0044249||GO:0044281||GO:0044283||GO:0046394||GO:0071704||GO:1901564||GO:1901566||GO:1901576	branched-chain amino acid biosynthetic process||oxidation-reduction process||metabolic process||organic acid metabolic process||cellular amino acid metabolic process||nitrogen compound metabolic process||biological_process||cellular amino acid biosynthetic process||biosynthetic process||branched-chain amino acid metabolic process||cellular process||organic acid biosynthetic process||carboxylic ac…			GO:0004455||GO:0003674||GO:0003824||GO:0016491||GO:0016614||GO:0016616	ketol-acid reductoisomerase activity||molecular_function||catalytic activity||oxidoreductase activity||oxidoreductase activity, acting on CH-OH group of donors||oxidoreductase activity, acting on the CH-OH group of donors, NAD or NADP as acceptor	pti00290||pti00770||pti01100||pti01110||pti01210||pti01230	Valine, leucine and isoleucine biosynthesis||Pantothenate and CoA biosynthesis||Metabolic pathways||Biosynthesis of secondary metabolites||2-Oxocarboxylic acid metabolism||Biosynthesis of amino acids
7200077	0.303869	0.349644	0.561772	1.45046	0.00128975	0.00716017	PHATRDRAFT_7173	NC_011674.1	101013	101441	-	429	protein_coding	predicted protein && Q9UVT8.1 RecName: Full=6,7-dimethyl-8-ribityllumazine synthase; Short=DMRL synthase; Short=LS; Short=Lumazine synthase && PF00885:6,7-dimethyl-8-ribityllumazine synthase	-	GO:0009231||GO:0008152||GO:0006766||GO:0006767||GO:0006771||GO:0006807||GO:0008150||GO:0009058||GO:0009110||GO:0009987||GO:0017144||GO:0018130||GO:0034641||GO:0042364||GO:0042726||GO:0042727||GO:0044237||GO:0044249||GO:0044271||GO:0044281||GO:0044283||GO:0046483||GO:0071704||GO:1901360||GO:1901362||GO:1901564||GO:1901566||GO:1901576	riboflavin biosynthetic process||metabolic process||vitamin metabolic process||water-soluble vitamin metabolic process||riboflavin metabolic process||nitrogen compound metabolic process||biological_process||biosynthetic process||vitamin biosynthetic process||cellular process||drug metabolic process||heterocycle biosynthetic process||cellular nitrogen compound metabolic process||water-soluble vita…	GO:0009349||GO:0005575||GO:0005623||GO:0032991||GO:0044464||GO:1902494||GO:1990234	riboflavin synthase complex||cellular_component||cell||protein-containing complex||cell part||catalytic complex||transferase complex			pti00740||pti01100||pti01110	Riboflavin metabolism||Metabolic pathways||Biosynthesis of secondary metabolites
7204948	1.58116	8.22886e-08	5.76858e-06	1.37927	3.21394e-10	9.49968e-09	PHATRDRAFT_bd348	NW_002238012.1	35190	36755	+	1566	protein_coding	predicted protein && Q01292.1 RecName: Full=Ketol-acid reductoisomerase, chloroplastic; AltName: Full=Acetohydroxy-acid reductoisomerase; AltName: Full=Alpha-keto-beta-hydroxylacyl reductoisomerase; Flags: Precursor && PF07991:Acetohydroxy acid isomeroreductase, NADPH-binding domain|PF01450:Acetohydroxy acid isomeroreductase, catalytic domain	-	GO:0055114||GO:0009082||GO:0008152||GO:0008150||GO:0006082||GO:0006520||GO:0006807||GO:0008652||GO:0009058||GO:0009081||GO:0009987||GO:0016053||GO:0019752||GO:0043436||GO:0044237||GO:0044238||GO:0044249||GO:0044281||GO:0044283||GO:0046394||GO:0071704||GO:1901564||GO:1901566||GO:1901576	oxidation-reduction process||branched-chain amino acid biosynthetic process||metabolic process||biological_process||organic acid metabolic process||cellular amino acid metabolic process||nitrogen compound metabolic process||cellular amino acid biosynthetic process||biosynthetic process||branched-chain amino acid metabolic process||cellular process||organic acid biosynthetic process||carboxylic ac…			GO:0004455||GO:0003674||GO:0003824||GO:0016491||GO:0016614||GO:0016616	ketol-acid reductoisomerase activity||molecular_function||catalytic activity||oxidoreductase activity||oxidoreductase activity, acting on CH-OH group of donors||oxidoreductase activity, acting on the CH-OH group of donors, NAD or NADP as acceptor	pti00290||pti00770||pti01100||pti01110||pti01210||pti01230	Valine, leucine and isoleucine biosynthesis||Pantothenate and CoA biosynthesis||Metabolic pathways||Biosynthesis of secondary metabolites||2-Oxocarboxylic acid metabolism||Biosynthesis of amino acids
7200404	1.41238	0.000701228	0.00878502	1.34245	0.000670803	0.00416092	PHATRDRAFT_5902	NC_011675.1	802070	802804	+	639	protein_coding	predicted protein && Q8YVS7.1 RecName: Full=Heme oxygenase 1 && PF01126:Heme oxygenase	-	GO:0006788||GO:0055114||GO:0008152||GO:0006725||GO:0006778||GO:0006787||GO:0006807||GO:0008150||GO:0009056||GO:0009987||GO:0019439||GO:0033013||GO:0033015||GO:0034641||GO:0042168||GO:0042440||GO:0044237||GO:0044248||GO:0044270||GO:0046483||GO:0046700||GO:0051186||GO:0051187||GO:0071704||GO:1901360||GO:1901361||GO:1901564||GO:1901565||GO:1901575	heme oxidation||oxidation-reduction process||metabolic process||cellular aromatic compound metabolic process||porphyrin-containing compound metabolic process||porphyrin-containing compound catabolic process||nitrogen compound metabolic process||biological_process||catabolic process||cellular process||aromatic compound catabolic process||tetrapyrrole metabolic process||tetrapyrrole catabolic proce…			GO:0004392||GO:0003674||GO:0003824||GO:0016491||GO:0016705	heme oxygenase (decyclizing) activity||molecular_function||catalytic activity||oxidoreductase activity||oxidoreductase activity, acting on paired donors, with incorporation or reduction of molecular oxygen	pti00860||pti01100||pti01110	Porphyrin and chlorophyll metabolism||Metabolic pathways||Biosynthesis of secondary metabolites
7200872	1.31862	2.76225e-07	1.54041e-05	1.24403	2.86065e-11	9.99276e-10	PHATRDRAFT_45715	NC_011676.1	4898	7135	+	2238	protein_coding	predicted protein && - && PF02037:SAP domain	SAP	GO:0006418||GO:0008152||GO:0006082||GO:0006139||GO:0006399||GO:0006412||GO:0006518||GO:0006520||GO:0006725||GO:0006807||GO:0008150||GO:0009058||GO:0009059||GO:0009987||GO:0010467||GO:0016070||GO:0019538||GO:0019752||GO:0034641||GO:0034645||GO:0034660||GO:0043038||GO:0043039||GO:0043043||GO:0043170||GO:0043436||GO:0043603||GO:0043604||GO:0044237||GO:0044238||GO:0044249||GO:0044260||GO:0044267||GO:…	tRNA aminoacylation for protein translation||metabolic process||organic acid metabolic process||nucleobase-containing compound metabolic process||tRNA metabolic process||translation||peptide metabolic process||cellular amino acid metabolic process||cellular aromatic compound metabolic process||nitrogen compound metabolic process||biological_process||biosynthetic process||macromolecule biosyntheti…			GO:0000166||GO:0004812||GO:0005524||GO:0003674||GO:0005488||GO:0036094||GO:0097159||GO:1901265||GO:1901363||GO:0003824||GO:0016874||GO:0016875||GO:0140098||GO:0140101||GO:0008144||GO:0017076||GO:0030554||GO:0032553||GO:0032555||GO:0032559||GO:0035639||GO:0043167||GO:0043168||GO:0097367	nucleotide binding||aminoacyl-tRNA ligase activity||ATP binding||molecular_function||binding||small molecule binding||organic cyclic compound binding||nucleoside phosphate binding||heterocyclic compound binding||catalytic activity||ligase activity||ligase activity, forming carbon-oxygen bonds||catalytic activity, acting on RNA||catalytic activity, acting on a tRNA||drug binding||purine nucleotide…	--	--
7204891	1.03908	0.000371655	0.00542939	1.20111	2.46833e-10	7.39742e-09	PHATRDRAFT_bd1569	NW_002238013.1	23307	25545	-	2181	protein_coding	predicted protein && - && PF02037:SAP domain	SAP	GO:0006418||GO:0008152||GO:0006082||GO:0006139||GO:0006399||GO:0006412||GO:0006518||GO:0006520||GO:0006725||GO:0006807||GO:0008150||GO:0009058||GO:0009059||GO:0009987||GO:0010467||GO:0016070||GO:0019538||GO:0019752||GO:0034641||GO:0034645||GO:0034660||GO:0043038||GO:0043039||GO:0043043||GO:0043170||GO:0043436||GO:0043603||GO:0043604||GO:0044237||GO:0044238||GO:0044249||GO:0044260||GO:0044267||GO:…	tRNA aminoacylation for protein translation||metabolic process||organic acid metabolic process||nucleobase-containing compound metabolic process||tRNA metabolic process||translation||peptide metabolic process||cellular amino acid metabolic process||cellular aromatic compound metabolic process||nitrogen compound metabolic process||biological_process||biosynthetic process||macromolecule biosyntheti…			GO:0000166||GO:0004812||GO:0005524||GO:0003674||GO:0005488||GO:0036094||GO:0097159||GO:1901265||GO:1901363||GO:0003824||GO:0016874||GO:0016875||GO:0140098||GO:0140101||GO:0008144||GO:0017076||GO:0030554||GO:0032553||GO:0032555||GO:0032559||GO:0035639||GO:0043167||GO:0043168||GO:0097367	nucleotide binding||aminoacyl-tRNA ligase activity||ATP binding||molecular_function||binding||small molecule binding||organic cyclic compound binding||nucleoside phosphate binding||heterocyclic compound binding||catalytic activity||ligase activity||ligase activity, forming carbon-oxygen bonds||catalytic activity, acting on RNA||catalytic activity, acting on a tRNA||drug binding||purine nucleotide…	--	--
7196765	1.23586	1.29768e-09	1.59293e-07	1.13407	9.5982e-11	3.00195e-09	PHATRDRAFT_32326	NC_011669.1	2214283	2215287	-	930	protein_coding	predicted protein && P56184.1 RecName: Full=Ribose-phosphate pyrophosphokinase; Short=RPPK; AltName: Full=5-phospho-D-ribosyl alpha-1-diphosphate; AltName: Full=Phosphoribosyl diphosphate synthase; AltName: Full=Phosphoribosyl pyrophosphate synthase; Short=P-Rib-PP synthase; Short=PRPP synthase; Short=PRPPase && PF13793:N-terminal domain of ribose phosphate pyrophosphokinase|PF14572:Phosphoribosy…	-	GO:0009165||GO:0008152||GO:0006139||GO:0006725||GO:0006753||GO:0006793||GO:0006796||GO:0006807||GO:0008150||GO:0009058||GO:0009117||GO:0009987||GO:0018130||GO:0019438||GO:0019637||GO:0034641||GO:0034654||GO:0044237||GO:0044238||GO:0044249||GO:0044271||GO:0044281||GO:0046483||GO:0055086||GO:0071704||GO:0090407||GO:1901293||GO:1901360||GO:1901362||GO:1901576	nucleotide biosynthetic process||metabolic process||nucleobase-containing compound metabolic process||cellular aromatic compound metabolic process||nucleoside phosphate metabolic process||phosphorus metabolic process||phosphate-containing compound metabolic process||nitrogen compound metabolic process||biological_process||biosynthetic process||nucleotide metabolic process||cellular process||heter…			GO:0000287||GO:0004749||GO:0003674||GO:0005488||GO:0046872||GO:0043167||GO:0043169||GO:0003824||GO:0016740||GO:0016772||GO:0016778	magnesium ion binding||ribose phosphate diphosphokinase activity||molecular_function||binding||metal ion binding||ion binding||cation binding||catalytic activity||transferase activity||transferase activity, transferring phosphorus-containing groups||diphosphotransferase activity	pti00030||pti00230||pti01100||pti01110||pti01200||pti01230	Pentose phosphate pathway||Purine metabolism||Metabolic pathways||Biosynthesis of secondary metabolites||Carbon metabolism||Biosynthesis of amino acids
7202915	1.29987	8.05071e-05	0.00161495	1.10022	6.13492e-07	9.00486e-06	Fba3	NC_011682.1	707216	708876	+	1417	protein_coding	cytosolic class II aldolase && Q9URB4.2 RecName: Full=Fructose-bisphosphate aldolase; Short=FBP aldolase; Short=FBPA; AltName: Full=37 kDa major allergen; AltName: Full=Fructose-1,6-bisphosphate aldolase; AltName: Full=IgE-binding allergen && PF01116:Fructose-bisphosphate aldolase class-II	F_bP_aldolase	GO:0005975||GO:0008152||GO:0008150||GO:0044238||GO:0071704	carbohydrate metabolic process||metabolic process||biological_process||primary metabolic process||organic substance metabolic process			GO:0008270||GO:0016832||GO:0003674||GO:0005488||GO:0046872||GO:0043167||GO:0043169||GO:0046914||GO:0003824||GO:0016829||GO:0016830	zinc ion binding||aldehyde-lyase activity||molecular_function||binding||metal ion binding||ion binding||cation binding||transition metal ion binding||catalytic activity||lyase activity||carbon-carbon lyase activity	pti00010||pti00030||pti00051||pti00710||pti01100||pti01110||pti01200||pti01230	Glycolysis / Gluconeogenesis||Pentose phosphate pathway||Fructose and mannose metabolism||Carbon fixation in photosynthetic organisms||Metabolic pathways||Biosynthesis of secondary metabolites||Carbon metabolism||Biosynthesis of amino acids
7204874	1.08005	0.012384	0.068494	1.0634	3.85152e-05	0.00035177	PHATRDRAFT_bd913	NW_002238036.1	46984	48453	+	1300	protein_coding	predicted protein && Q54F07.1 RecName: Full=S-adenosylmethionine synthase; Short=AdoMet synthase; AltName: Full=Methionine adenosyltransferase; Short=MAT && PF02773:S-adenosylmethionine synthetase, C-terminal domain|PF02772:S-adenosylmethionine synthetase, central domain|PF00438:S-adenosylmethionine synthetase, N-terminal domain	-	GO:0006556||GO:0006790||GO:0008152||GO:0006732||GO:0008150||GO:0009058||GO:0009108||GO:0009987||GO:0017144||GO:0044237||GO:0044249||GO:0044272||GO:0046500||GO:0051186||GO:0051188||GO:0071704||GO:1901576	S-adenosylmethionine biosynthetic process||sulfur compound metabolic process||metabolic process||coenzyme metabolic process||biological_process||biosynthetic process||coenzyme biosynthetic process||cellular process||drug metabolic process||cellular metabolic process||cellular biosynthetic process||sulfur compound biosynthetic process||S-adenosylmethionine metabolic process||cofactor metabolic pro…			GO:0004478||GO:0003674||GO:0003824||GO:0016740||GO:0016765	methionine adenosyltransferase activity||molecular_function||catalytic activity||transferase activity||transferase activity, transferring alkyl or aryl (other than methyl) groups	pti00270||pti01100||pti01110||pti01230	Cysteine and methionine metabolism||Metabolic pathways||Biosynthesis of secondary metabolites||Biosynthesis of amino acids
7199266	1.23923	1.67384e-05	0.000468542	1.03127	5.3748e-05	0.000470524	FbaC5	NC_011698.1	131449	133095	-	1552	protein_coding	fructose-bisphosphate aldolase && Q944G9.2 RecName: Full=Fructose-bisphosphate aldolase 2, chloroplastic; Short=AtFBA2; Flags: Precursor && PF00274:Fructose-bisphosphate aldolase class-I	-	GO:0006096||GO:0008152||GO:0005975||GO:0006082||GO:0006090||GO:0006091||GO:0006139||GO:0006163||GO:0006164||GO:0006165||GO:0006725||GO:0006732||GO:0006733||GO:0006753||GO:0006754||GO:0006757||GO:0006793||GO:0006796||GO:0006807||GO:0008150||GO:0009056||GO:0009058||GO:0009108||GO:0009117||GO:0009123||GO:0009124||GO:0009126||GO:0009127||GO:0009132||GO:0009135||GO:0009141||GO:0009142||GO:0009144||GO:…	glycolytic process||metabolic process||carbohydrate metabolic process||organic acid metabolic process||pyruvate metabolic process||generation of precursor metabolites and energy||nucleobase-containing compound metabolic process||purine nucleotide metabolic process||purine nucleotide biosynthetic process||nucleoside diphosphate phosphorylation||cellular aromatic compound metabolic process||coenzym…			GO:0004332||GO:0003674||GO:0003824||GO:0016829||GO:0016830||GO:0016832	fructose-bisphosphate aldolase activity||molecular_function||catalytic activity||lyase activity||carbon-carbon lyase activity||aldehyde-lyase activity	pti00010||pti00030||pti00051||pti00710||pti01100||pti01110||pti01200||pti01230	Glycolysis / Gluconeogenesis||Pentose phosphate pathway||Fructose and mannose metabolism||Carbon fixation in photosynthetic organisms||Metabolic pathways||Biosynthesis of secondary metabolites||Carbon metabolism||Biosynthesis of amino acids
7198319	0.973793	0.000531152	0.0072005	1.00992	0.0013313	0.00736045	METH	NC_011691.1	421969	428366	-	4118	protein_coding	methionine synthase && Q9Z2Q4.1 RecName: Full=Methionine synthase; AltName: Full=5-methyltetrahydrofolate--homocysteine methyltransferase; AltName: Full=Vitamin-B12 dependent methionine synthase; Short=MS && PF02310:B12 binding domain|PF02574:Homocysteine S-methyltransferase|PF02965:Vitamin B12 dependent methionine synthase, activation domain|PF00809:Pterin binding enzyme|PF02607:B12 binding doma…	B12-binding	GO:0044237||GO:0009086||GO:0042558||GO:0008152||GO:0008150||GO:0009987||GO:0000096||GO:0000097||GO:0006790||GO:0006082||GO:0006520||GO:0006555||GO:0006807||GO:0008652||GO:0009058||GO:0009066||GO:0009067||GO:0016053||GO:0019752||GO:0043436||GO:0044238||GO:0044249||GO:0044272||GO:0044281||GO:0044283||GO:0046394||GO:0071704||GO:1901564||GO:1901566||GO:1901576||GO:1901605||GO:1901607||GO:0006725||GO:…	cellular metabolic process||methionine biosynthetic process||pteridine-containing compound metabolic process||metabolic process||biological_process||cellular process||sulfur amino acid metabolic process||sulfur amino acid biosynthetic process||sulfur compound metabolic process||organic acid metabolic process||cellular amino acid metabolic process||methionine metabolic process||nitrogen compound m…	GO:0005622||GO:0005575||GO:0005623||GO:0044464	intracellular||cellular_component||cell||cell part	GO:0031419||GO:0046872||GO:0008705||GO:0003674||GO:0005488||GO:0008144||GO:0019842||GO:0036094||GO:0046906||GO:0048037||GO:0097159||GO:1901363||GO:0043167||GO:0043169||GO:0003824||GO:0008168||GO:0008172||GO:0016740||GO:0016741||GO:0042084	cobalamin binding||metal ion binding||methionine synthase activity||molecular_function||binding||drug binding||vitamin binding||small molecule binding||tetrapyrrole binding||cofactor binding||organic cyclic compound binding||heterocyclic compound binding||ion binding||cation binding||catalytic activity||methyltransferase activity||S-methyltransferase activity||transferase activity||transferase ac…	pti00270||pti00450||pti00670||pti01100||pti01110||pti01230	Cysteine and methionine metabolism||Selenocompound metabolism||One carbon pool by folate||Metabolic pathways||Biosynthesis of secondary metabolites||Biosynthesis of amino acids
7195593	1.09405	0.000872984	0.0103374	1.00465	7.69408e-06	8.62297e-05	PHATRDRAFT_49325	NC_011689.1	584717	586063	-	1148	protein_coding	predicted protein && P08836.2 RecName: Full=Farnesyl pyrophosphate synthase; Short=FPP synthase; Short=FPS; AltName: Full=(2E,6E)-farnesyl diphosphate synthase; AltName: Full=Dimethylallyltranstransferase; AltName: Full=Farnesyl diphosphate synthase; AltName: Full=Geranyltranstransferase && PF00348:Polyprenyl synthetase	-	GO:0008299||GO:0008152||GO:0006629||GO:0006720||GO:0008150||GO:0008610||GO:0009058||GO:0009987||GO:0044237||GO:0044238||GO:0044249||GO:0044255||GO:0071704||GO:1901576	isoprenoid biosynthetic process||metabolic process||lipid metabolic process||isoprenoid metabolic process||biological_process||lipid biosynthetic process||biosynthetic process||cellular process||cellular metabolic process||primary metabolic process||cellular biosynthetic process||cellular lipid metabolic process||organic substance metabolic process||organic substance biosynthetic process					pti00900||pti01100||pti01110	Terpenoid backbone biosynthesis||Metabolic pathways||Biosynthesis of secondary metabolites
7199673	1.04322	0.00763069	0.0500671	0.955415	0.000206885	0.00154253	PHATRDRAFT_34582	NC_011673.1	961897	962901	-	1005	protein_coding	predicted protein && B0C312.1 RecName: Full=Diaminopimelate epimerase; Short=DAP epimerase && PF01678:Diaminopimelate epimerase	-	GO:0009089||GO:0008152||GO:0006082||GO:0006520||GO:0006553||GO:0006807||GO:0008150||GO:0008652||GO:0009058||GO:0009066||GO:0009067||GO:0009085||GO:0009987||GO:0016053||GO:0019752||GO:0043436||GO:0043648||GO:0044237||GO:0044238||GO:0044249||GO:0044281||GO:0044283||GO:0046394||GO:0046451||GO:0071704||GO:1901564||GO:1901566||GO:1901576||GO:1901605||GO:1901607	lysine biosynthetic process via diaminopimelate||metabolic process||organic acid metabolic process||cellular amino acid metabolic process||lysine metabolic process||nitrogen compound metabolic process||biological_process||cellular amino acid biosynthetic process||biosynthetic process||aspartate family amino acid metabolic process||aspartate family amino acid biosynthetic process||lysine biosynthe…			GO:0008837||GO:0003674||GO:0003824||GO:0016853||GO:0016854||GO:0016855||GO:0036361||GO:0047661	diaminopimelate epimerase activity||molecular_function||catalytic activity||isomerase activity||racemase and epimerase activity||racemase and epimerase activity, acting on amino acids and derivatives||racemase activity, acting on amino acids and derivatives||amino-acid racemase activity	pti00300||pti01100||pti01110||pti01230	Lysine biosynthesis||Metabolic pathways||Biosynthesis of secondary metabolites||Biosynthesis of amino acids
7200959	1.13036	0.00928071	0.0568907	0.950585	0.00105526	0.0060617	PHATRDRAFT_45852	NC_011676.1	468270	469976	+	1707	protein_coding	predicted protein && - && PF03222:Tryptophan/tyrosine permease family	-	GO:0003333||GO:0006810||GO:0006811||GO:0006820||GO:0006865||GO:0008150||GO:0015711||GO:0015849||GO:0034220||GO:0046942||GO:0051179||GO:0051234||GO:0055085||GO:0071702||GO:0071705||GO:0098656||GO:1903825||GO:1905039	amino acid transmembrane transport||transport||ion transport||anion transport||amino acid transport||biological_process||organic anion transport||organic acid transport||ion transmembrane transport||carboxylic acid transport||localization||establishment of localization||transmembrane transport||organic substance transport||nitrogen compound transport||anion transmembrane transport||organic acid t…					--	--
7199682	1.41075	6.66381e-09	6.51357e-07	0.694899	2.61961e-05	0.000252096	PHATRDRAFT_45017	NC_011673.1	1009622	1012281	+	2571	protein_coding	predicted protein && P16100.5 RecName: Full=Isocitrate dehydrogenase [NADP]; Short=IDH; AltName: Full=Oxalosuccinate decarboxylase && PF03971:Monomeric isocitrate dehydrogenase	IDH	GO:0006099||GO:0055114||GO:0008152||GO:0006082||GO:0006091||GO:0006101||GO:0008150||GO:0009060||GO:0009987||GO:0015980||GO:0016999||GO:0017144||GO:0019752||GO:0043436||GO:0044237||GO:0044238||GO:0044281||GO:0045333||GO:0071704||GO:0072350	tricarboxylic acid cycle||oxidation-reduction process||metabolic process||organic acid metabolic process||generation of precursor metabolites and energy||citrate metabolic process||biological_process||aerobic respiration||cellular process||energy derivation by oxidation of organic compounds||antibiotic metabolic process||drug metabolic process||carboxylic acid metabolic process||oxoacid metabolic…			GO:0004450||GO:0003674||GO:0003824||GO:0004448||GO:0016491||GO:0016614||GO:0016616	isocitrate dehydrogenase (NADP+) activity||molecular_function||catalytic activity||isocitrate dehydrogenase activity||oxidoreductase activity||oxidoreductase activity, acting on CH-OH group of donors||oxidoreductase activity, acting on the CH-OH group of donors, NAD or NADP as acceptor	--	--
7198201	1.29274	0.00061554	0.00800276	0.628497	0.0483784	0.130648	PHATRDRAFT_30471	NC_011691.1	123868	125488	+	1404	protein_coding	predicted protein && Q9SE94.1 RecName: Full=Methylenetetrahydrofolate reductase 1; AltName: Full=ZmMTHFR1 && PF02219:Methylenetetrahydrofolate reductase	-	GO:0006555||GO:0055114||GO:0000096||GO:0006790||GO:0008152||GO:0006082||GO:0006520||GO:0006807||GO:0008150||GO:0009066||GO:0009987||GO:0019752||GO:0043436||GO:0044237||GO:0044238||GO:0044281||GO:0071704||GO:1901564||GO:1901605	methionine metabolic process||oxidation-reduction process||sulfur amino acid metabolic process||sulfur compound metabolic process||metabolic process||organic acid metabolic process||cellular amino acid metabolic process||nitrogen compound metabolic process||biological_process||aspartate family amino acid metabolic process||cellular process||carboxylic acid metabolic process||oxoacid metabolic pro…			GO:0004489||GO:0003674||GO:0003824||GO:0016491||GO:0016645||GO:0016646	methylenetetrahydrofolate reductase (NAD(P)H) activity||molecular_function||catalytic activity||oxidoreductase activity||oxidoreductase activity, acting on the CH-NH group of donors||oxidoreductase activity, acting on the CH-NH group of donors, NAD or NADP as acceptor	pti00670||pti01100||pti01200	One carbon pool by folate||Metabolic pathways||Carbon metabolism
7205056	1.02759	0.00499912	0.0369033	0.548473	0.116422	0.248267	PHATRDRAFT_bd1874	NW_002238015.1	15441	17348	-	1574	protein_coding	predicted protein && Q27655.1 RecName: Full=Enolase; AltName: Full=2-phospho-D-glycerate hydro-lyase; AltName: Full=2-phosphoglycerate dehydratase && PF03952:Enolase, N-terminal domain|PF00113:Enolase, C-terminal TIM barrel domain	-	GO:0006096||GO:0008152||GO:0005975||GO:0006082||GO:0006090||GO:0006091||GO:0006139||GO:0006163||GO:0006164||GO:0006165||GO:0006725||GO:0006732||GO:0006733||GO:0006753||GO:0006754||GO:0006757||GO:0006793||GO:0006796||GO:0006807||GO:0008150||GO:0009056||GO:0009058||GO:0009108||GO:0009117||GO:0009123||GO:0009124||GO:0009126||GO:0009127||GO:0009132||GO:0009135||GO:0009141||GO:0009142||GO:0009144||GO:…	glycolytic process||metabolic process||carbohydrate metabolic process||organic acid metabolic process||pyruvate metabolic process||generation of precursor metabolites and energy||nucleobase-containing compound metabolic process||purine nucleotide metabolic process||purine nucleotide biosynthetic process||nucleoside diphosphate phosphorylation||cellular aromatic compound metabolic process||coenzym…	GO:0000015||GO:0005622||GO:0005575||GO:0005829||GO:0005623||GO:0005737||GO:0032991||GO:0044424||GO:0044444||GO:0044445||GO:0044464||GO:1902494	phosphopyruvate hydratase complex||intracellular||cellular_component||cytosol||cell||cytoplasm||protein-containing complex||intracellular part||cytoplasmic part||cytosolic part||cell part||catalytic complex	GO:0000287||GO:0004634||GO:0003674||GO:0005488||GO:0046872||GO:0043167||GO:0043169||GO:0003824||GO:0016829||GO:0016835||GO:0016836	magnesium ion binding||phosphopyruvate hydratase activity||molecular_function||binding||metal ion binding||ion binding||cation binding||catalytic activity||lyase activity||carbon-oxygen lyase activity||hydro-lyase activity	pti00010||pti01100||pti01110||pti01200||pti01230||pti03018	Glycolysis / Gluconeogenesis||Metabolic pathways||Biosynthesis of secondary metabolites||Carbon metabolism||Biosynthesis of amino acids||RNA degradation
7204556	1.13804	9.25361e-05	0.00179593	0.539137	0.00530372	0.0231304	PHATR_21116	NC_011679.1	537399	539011	+	1613	protein_coding	predicted protein && Q66I24.1 RecName: Full=Argininosuccinate synthase; AltName: Full=Citrulline--aspartate ligase && PF00764:Arginosuccinate synthase	-	GO:0006526||GO:0008152||GO:0006082||GO:0006520||GO:0006525||GO:0006807||GO:0008150||GO:0008652||GO:0009058||GO:0009064||GO:0009084||GO:0009987||GO:0016053||GO:0019752||GO:0043436||GO:0044237||GO:0044238||GO:0044249||GO:0044281||GO:0044283||GO:0046394||GO:0071704||GO:1901564||GO:1901566||GO:1901576||GO:1901605||GO:1901607	arginine biosynthetic process||metabolic process||organic acid metabolic process||cellular amino acid metabolic process||arginine metabolic process||nitrogen compound metabolic process||biological_process||cellular amino acid biosynthetic process||biosynthetic process||glutamine family amino acid metabolic process||glutamine family amino acid biosynthetic process||cellular process||organic acid b…			GO:0004055||GO:0005524||GO:0003674||GO:0003824||GO:0016874||GO:0016879||GO:0000166||GO:0005488||GO:0008144||GO:0017076||GO:0030554||GO:0032553||GO:0032555||GO:0032559||GO:0035639||GO:0036094||GO:0043167||GO:0043168||GO:0097159||GO:0097367||GO:1901265||GO:1901363	argininosuccinate synthase activity||ATP binding||molecular_function||catalytic activity||ligase activity||ligase activity, forming carbon-nitrogen bonds||nucleotide binding||binding||drug binding||purine nucleotide binding||adenyl nucleotide binding||ribonucleotide binding||purine ribonucleotide binding||adenyl ribonucleotide binding||purine ribonucleoside triphosphate binding||small molecule bi…	pti00220||pti00250||pti01100||pti01110||pti01230	Arginine biosynthesis||Alanine, aspartate and glutamate metabolism||Metabolic pathways||Biosynthesis of secondary metabolites||Biosynthesis of amino acids
7194806	-1.18768	0.000117667	0.00217381	-0.207425	0.43373	0.612769	ACC1	NC_011686.1	291011	298206	+	6388	protein_coding	acetyl-coa carboxylase && P11029.1 RecName: Full=Acetyl-CoA carboxylase; Short=ACC; Includes: RecName: Full=Biotin carboxylase && PF00364:Biotin-requiring enzyme|PF02785:Biotin carboxylase C-terminal domain|PF01039:Carboxyl transferase domain|PF08326:Acetyl-CoA carboxylase, central region|PF02786:Carbamoyl-phosphate synthase L chain, ATP binding domain|PF00289:Carbamoyl-phosphate synthase L chain…	Carboxyl_trans	GO:0006633||GO:0008152||GO:0006082||GO:0006629||GO:0006631||GO:0008150||GO:0008610||GO:0009058||GO:0009987||GO:0016053||GO:0019752||GO:0032787||GO:0043436||GO:0044237||GO:0044238||GO:0044249||GO:0044255||GO:0044281||GO:0044283||GO:0046394||GO:0071704||GO:0072330||GO:1901576	fatty acid biosynthetic process||metabolic process||organic acid metabolic process||lipid metabolic process||fatty acid metabolic process||biological_process||lipid biosynthetic process||biosynthetic process||cellular process||organic acid biosynthetic process||carboxylic acid metabolic process||monocarboxylic acid metabolic process||oxoacid metabolic process||cellular metabolic process||primary …			GO:0003989||GO:0005524||GO:0003674||GO:0003824||GO:0016421||GO:0016874||GO:0016885||GO:0000166||GO:0005488||GO:0008144||GO:0017076||GO:0030554||GO:0032553||GO:0032555||GO:0032559||GO:0035639||GO:0036094||GO:0043167||GO:0043168||GO:0097159||GO:0097367||GO:1901265||GO:1901363	acetyl-CoA carboxylase activity||ATP binding||molecular_function||catalytic activity||CoA carboxylase activity||ligase activity||ligase activity, forming carbon-carbon bonds||nucleotide binding||binding||drug binding||purine nucleotide binding||adenyl nucleotide binding||ribonucleotide binding||purine ribonucleotide binding||adenyl ribonucleotide binding||purine ribonucleoside triphosphate bindin…	pti00061||pti00620||pti00640||pti01100||pti01110||pti01212	Fatty acid biosynthesis||Pyruvate metabolism||Propanoate metabolism||Metabolic pathways||Biosynthesis of secondary metabolites||Fatty acid metabolism
7200174	1.05148	0.00267401	0.0233938	-0.323839	0.340427	0.523686	KAS1	NC_011674.1	179480	181854	-	2256	protein_coding	beta ketoacyl-coa synthase && Q9XF43.1 RecName: Full=3-ketoacyl-CoA synthase 6; Short=KCS-6; AltName: Full=Cuticular protein 1; AltName: Full=Eceriferum 6; AltName: Full=Very long-chain fatty acid condensing enzyme 6; Short=VLCFA condensing enzyme 6 && PF08392:FAE1/Type III polyketide synthase-like protein|PF02797:Chalcone and stilbene synthases, C-terminal domain	Chal_sti_synt_C	GO:0006633||GO:0008152||GO:0006082||GO:0006629||GO:0006631||GO:0008150||GO:0008610||GO:0009058||GO:0009987||GO:0016053||GO:0019752||GO:0032787||GO:0043436||GO:0044237||GO:0044238||GO:0044249||GO:0044255||GO:0044281||GO:0044283||GO:0046394||GO:0071704||GO:0072330||GO:1901576	fatty acid biosynthetic process||metabolic process||organic acid metabolic process||lipid metabolic process||fatty acid metabolic process||biological_process||lipid biosynthetic process||biosynthetic process||cellular process||organic acid biosynthetic process||carboxylic acid metabolic process||monocarboxylic acid metabolic process||oxoacid metabolic process||cellular metabolic process||primary …	GO:0016020||GO:0005575	membrane||cellular_component	GO:0016747||GO:0003824||GO:0003674||GO:0016740||GO:0016746	transferase activity, transferring acyl groups other than amino-acyl groups||catalytic activity||molecular_function||transferase activity||transferase activity, transferring acyl groups	--	--
7203855	-1.14134	0.000354267	0.0052539	-0.737912	0.00318263	0.0151622	PHATR_33435	NC_011671.1	898071	898932	-	798	protein_coding	predicted protein && - && PF04116:Fatty acid hydroxylase superfamily	-	GO:0006633||GO:0055114||GO:0008152||GO:0006082||GO:0006629||GO:0006631||GO:0008150||GO:0008610||GO:0009058||GO:0009987||GO:0016053||GO:0019752||GO:0032787||GO:0043436||GO:0044237||GO:0044238||GO:0044249||GO:0044255||GO:0044281||GO:0044283||GO:0046394||GO:0071704||GO:0072330||GO:1901576	fatty acid biosynthetic process||oxidation-reduction process||metabolic process||organic acid metabolic process||lipid metabolic process||fatty acid metabolic process||biological_process||lipid biosynthetic process||biosynthetic process||cellular process||organic acid biosynthetic process||carboxylic acid metabolic process||monocarboxylic acid metabolic process||oxoacid metabolic process||cellula…			GO:0005506||GO:0016491||GO:0003674||GO:0005488||GO:0046872||GO:0043167||GO:0043169||GO:0046914||GO:0003824	iron ion binding||oxidoreductase activity||molecular_function||binding||metal ion binding||ion binding||cation binding||transition metal ion binding||catalytic activity	--	--
7196181	-1.08072	1.91825e-06	7.79584e-05	-0.775738	0.000836551	0.0050005	PHATRDRAFT_8975	NC_011669.1	1520280	1521398	-	1053	protein_coding	predicted protein && Q949Q0.1 RecName: Full=Glycerol-3-phosphate dehydrogenase [NAD(+)] 2, chloroplastic; AltName: Full=Protein SUPPRESSOR OF FATTY ACID DESATURASE DEFICIENCY 1; Flags: Precursor && PF01210:NAD-dependent glycerol-3-phosphate dehydrogenase N-terminus|PF07479:NAD-dependent glycerol-3-phosphate dehydrogenase C-terminus	NAD_Gly3P_dh_C	GO:0055114||GO:0046168||GO:0005975||GO:0008152||GO:0008150||GO:0006072||GO:0006793||GO:0006796||GO:0009056||GO:0009987||GO:0019637||GO:0044237||GO:0046434||GO:0052646||GO:0071704||GO:1901135||GO:1901136||GO:1901575||GO:0044238	oxidation-reduction process||glycerol-3-phosphate catabolic process||carbohydrate metabolic process||metabolic process||biological_process||glycerol-3-phosphate metabolic process||phosphorus metabolic process||phosphate-containing compound metabolic process||catabolic process||cellular process||organophosphate metabolic process||cellular metabolic process||organophosphate catabolic process||aldit…			GO:0016616||GO:0051287||GO:0004367||GO:0003674||GO:0003824||GO:0016491||GO:0016614||GO:0000166||GO:0005488||GO:0036094||GO:0048037||GO:0050662||GO:0097159||GO:1901265||GO:1901363	oxidoreductase activity, acting on the CH-OH group of donors, NAD or NADP as acceptor||NAD binding||glycerol-3-phosphate dehydrogenase [NAD+] activity||molecular_function||catalytic activity||oxidoreductase activity||oxidoreductase activity, acting on CH-OH group of donors||nucleotide binding||binding||small molecule binding||cofactor binding||coenzyme binding||organic cyclic compound binding||nu…	pti00564||pti01110	Glycerophospholipid metabolism||Biosynthesis of secondary metabolites
7199630	-1.04991	3.76435e-09	4.04742e-07	-0.815236	0.000312956	0.00220359	HDS	NC_011673.1	765110	767756	-	2358	protein_coding	1-hydroxy-2-methyl-2-(E)-butenyl-4-diphosphate synthase && Q6K8J4.1 RecName: Full=4-hydroxy-3-methylbut-2-en-1-yl diphosphate synthase (ferredoxin), chloroplastic; AltName: Full=1-hydroxy-2-methyl-2-(E)-butenyl 4-diphosphate synthase; Flags: Precursor && PF04551:GcpE protein	-	GO:0016114||GO:0055114||GO:0008152||GO:0006629||GO:0006720||GO:0006721||GO:0008150||GO:0008299||GO:0008610||GO:0009058||GO:0009987||GO:0044237||GO:0044238||GO:0044249||GO:0044255||GO:0071704||GO:1901576	terpenoid biosynthetic process||oxidation-reduction process||metabolic process||lipid metabolic process||isoprenoid metabolic process||terpenoid metabolic process||biological_process||isoprenoid biosynthetic process||lipid biosynthetic process||biosynthetic process||cellular process||cellular metabolic process||primary metabolic process||cellular biosynthetic process||cellular lipid metabolic pro…			GO:0046429||GO:0003674||GO:0003824||GO:0016491||GO:0016725||GO:0052592	4-hydroxy-3-methylbut-2-en-1-yl diphosphate synthase activity||molecular_function||catalytic activity||oxidoreductase activity||oxidoreductase activity, acting on CH or CH2 groups||oxidoreductase activity, acting on CH or CH2 groups, with an iron-sulfur protein as acceptor	pti00900||pti01100||pti01110	Terpenoid backbone biosynthesis||Metabolic pathways||Biosynthesis of secondary metabolites
7203299	-0.918303	0.000484324	0.00672798	-1.08052	2.28408e-06	2.92902e-05	PHATRDRAFT_56599	NC_011684.1	354856	357734	+	2879	protein_coding	predicted protein && A9EYY7.1 RecName: Full=Leucine--tRNA ligase; AltName: Full=Leucyl-tRNA synthetase; Short=LeuRS && PF00133:tRNA synthetases class I (I, L, M and V)|PF09334:tRNA synthetases class I (M)|PF08264:Anticodon-binding domain of tRNA|PF13603:Leucyl-tRNA synthetase, Domain 2	-	GO:0006418||GO:0008152||GO:0006082||GO:0006139||GO:0006399||GO:0006412||GO:0006518||GO:0006520||GO:0006725||GO:0006807||GO:0008150||GO:0009058||GO:0009059||GO:0009987||GO:0010467||GO:0016070||GO:0019538||GO:0019752||GO:0034641||GO:0034645||GO:0034660||GO:0043038||GO:0043039||GO:0043043||GO:0043170||GO:0043436||GO:0043603||GO:0043604||GO:0044237||GO:0044238||GO:0044249||GO:0044260||GO:0044267||GO:…	tRNA aminoacylation for protein translation||metabolic process||organic acid metabolic process||nucleobase-containing compound metabolic process||tRNA metabolic process||translation||peptide metabolic process||cellular amino acid metabolic process||cellular aromatic compound metabolic process||nitrogen compound metabolic process||biological_process||biosynthetic process||macromolecule biosyntheti…			GO:0000166||GO:0004812||GO:0005524||GO:0002161||GO:0003674||GO:0005488||GO:0036094||GO:0097159||GO:1901265||GO:1901363||GO:0003824||GO:0016874||GO:0016875||GO:0140098||GO:0140101||GO:0008144||GO:0017076||GO:0030554||GO:0032553||GO:0032555||GO:0032559||GO:0035639||GO:0043167||GO:0043168||GO:0097367||GO:0016787||GO:0016788||GO:0052689	nucleotide binding||aminoacyl-tRNA ligase activity||ATP binding||aminoacyl-tRNA editing activity||molecular_function||binding||small molecule binding||organic cyclic compound binding||nucleoside phosphate binding||heterocyclic compound binding||catalytic activity||ligase activity||ligase activity, forming carbon-oxygen bonds||catalytic activity, acting on RNA||catalytic activity, acting on a tRNA…	--	--
7194700	-0.813606	0.000300596	0.00461716	-1.1342	2.05892e-06	2.67212e-05	PHATRDRAFT_15186	NC_011686.1	78387	81266	+	2880	protein_coding	predicted protein && P36428.3 RecName: Full=Alanine--tRNA ligase; AltName: Full=Alanyl-tRNA synthetase; Short=AlaRS; Flags: Precursor && PF07973:Threonyl and Alanyl tRNA synthetase second additional domain|PF01411:tRNA synthetases class II (A)	-	GO:0043039||GO:0006419||GO:0008152||GO:0006082||GO:0006139||GO:0006399||GO:0006520||GO:0006725||GO:0006807||GO:0008150||GO:0009987||GO:0016070||GO:0019752||GO:0034641||GO:0034660||GO:0043038||GO:0043170||GO:0043436||GO:0044237||GO:0044238||GO:0044281||GO:0046483||GO:0071704||GO:0090304||GO:1901360||GO:1901564||GO:0006412||GO:0006418||GO:0006518||GO:0009058||GO:0009059||GO:0010467||GO:0019538||GO:…	tRNA aminoacylation||alanyl-tRNA aminoacylation||metabolic process||organic acid metabolic process||nucleobase-containing compound metabolic process||tRNA metabolic process||cellular amino acid metabolic process||cellular aromatic compound metabolic process||nitrogen compound metabolic process||biological_process||cellular process||RNA metabolic process||carboxylic acid metabolic process||cellula…	GO:0005737||GO:0005622||GO:0005575||GO:0005623||GO:0044424||GO:0044464	cytoplasm||intracellular||cellular_component||cell||intracellular part||cell part	GO:0005524||GO:0000166||GO:0004813||GO:0003674||GO:0005488||GO:0008144||GO:0017076||GO:0030554||GO:0032553||GO:0032555||GO:0032559||GO:0035639||GO:0036094||GO:0043167||GO:0043168||GO:0097159||GO:0097367||GO:1901265||GO:1901363||GO:0003824||GO:0004812||GO:0016874||GO:0016875||GO:0140098||GO:0140101	ATP binding||nucleotide binding||alanine-tRNA ligase activity||molecular_function||binding||drug binding||purine nucleotide binding||adenyl nucleotide binding||ribonucleotide binding||purine ribonucleotide binding||adenyl ribonucleotide binding||purine ribonucleoside triphosphate binding||small molecule binding||ion binding||anion binding||organic cyclic compound binding||carbohydrate derivative …	pti00970	Aminoacyl-tRNA biosynthesis
7203195	-0.246325	0.315911	0.529265	-1.14661	0.00293299	0.0141634	PHATRDRAFT_29157	NC_011683.1	522021	523634	-	1461	protein_coding	predicted protein && Q9SBN4.1 RecName: Full=Phosphoglycerate kinase, chloroplastic; Flags: Precursor && PF00162:Phosphoglycerate kinase	-	GO:0006096||GO:0008152||GO:0005975||GO:0006082||GO:0006090||GO:0006091||GO:0006139||GO:0006163||GO:0006164||GO:0006165||GO:0006725||GO:0006732||GO:0006733||GO:0006753||GO:0006754||GO:0006757||GO:0006793||GO:0006796||GO:0006807||GO:0008150||GO:0009056||GO:0009058||GO:0009108||GO:0009117||GO:0009123||GO:0009124||GO:0009126||GO:0009127||GO:0009132||GO:0009135||GO:0009141||GO:0009142||GO:0009144||GO:…	glycolytic process||metabolic process||carbohydrate metabolic process||organic acid metabolic process||pyruvate metabolic process||generation of precursor metabolites and energy||nucleobase-containing compound metabolic process||purine nucleotide metabolic process||purine nucleotide biosynthetic process||nucleoside diphosphate phosphorylation||cellular aromatic compound metabolic process||coenzym…			GO:0004618||GO:0003674||GO:0003824||GO:0016301||GO:0016740||GO:0016772||GO:0016774	phosphoglycerate kinase activity||molecular_function||catalytic activity||kinase activity||transferase activity||transferase activity, transferring phosphorus-containing groups||phosphotransferase activity, carboxyl group as acceptor	pti00010||pti00710||pti01100||pti01110||pti01200||pti01230	Glycolysis / Gluconeogenesis||Carbon fixation in photosynthetic organisms||Metabolic pathways||Biosynthesis of secondary metabolites||Carbon metabolism||Biosynthesis of amino acids
7198755	-1.56401	3.57161e-11	6.4837e-09	-1.21293	7.23475e-06	8.19018e-05	GluRS_2	NC_011694.1	297053	299067	+	1765	protein_coding	glutamyl-trna synthase && Q9FEA2.1 RecName: Full=Glutamate--tRNA ligase, chloroplastic/mitochondrial; AltName: Full=AtERS; AltName: Full=Glutamyl-tRNA synthetase; Short=GluRS; AltName: Full=Protein OVULE ABORTION 3; Flags: Precursor && PF00749:tRNA synthetases class I (E and Q), catalytic domain	-	GO:0043039||GO:0008152||GO:0006082||GO:0006139||GO:0006399||GO:0006520||GO:0006725||GO:0006807||GO:0008150||GO:0009987||GO:0016070||GO:0019752||GO:0034641||GO:0034660||GO:0043038||GO:0043170||GO:0043436||GO:0044237||GO:0044238||GO:0044281||GO:0046483||GO:0071704||GO:0090304||GO:1901360||GO:1901564	tRNA aminoacylation||metabolic process||organic acid metabolic process||nucleobase-containing compound metabolic process||tRNA metabolic process||cellular amino acid metabolic process||cellular aromatic compound metabolic process||nitrogen compound metabolic process||biological_process||cellular process||RNA metabolic process||carboxylic acid metabolic process||cellular nitrogen compound metaboli…			GO:0005524||GO:0000049||GO:0000166||GO:0003674||GO:0005488||GO:0008144||GO:0017076||GO:0030554||GO:0032553||GO:0032555||GO:0032559||GO:0035639||GO:0036094||GO:0043167||GO:0043168||GO:0097159||GO:0097367||GO:1901265||GO:1901363||GO:0003676||GO:0003723	ATP binding||tRNA binding||nucleotide binding||molecular_function||binding||drug binding||purine nucleotide binding||adenyl nucleotide binding||ribonucleotide binding||purine ribonucleotide binding||adenyl ribonucleotide binding||purine ribonucleoside triphosphate binding||small molecule binding||ion binding||anion binding||organic cyclic compound binding||carbohydrate derivative binding||nucleos…	pti00860||pti00970||pti01100||pti01110	Porphyrin and chlorophyll metabolism||Aminoacyl-tRNA biosynthesis||Metabolic pathways||Biosynthesis of secondary metabolites
7197926	-0.341334	0.20283	0.40786	-1.25213	6.79327e-09	1.58946e-07	PHATRDRAFT_10852	NC_011672.1	1309035	1309535	+	501	protein_coding	predicted protein && - && PF04116:Fatty acid hydroxylase superfamily	-	GO:0006633||GO:0055114||GO:0008152||GO:0006082||GO:0006629||GO:0006631||GO:0008150||GO:0008610||GO:0009058||GO:0009987||GO:0016053||GO:0019752||GO:0032787||GO:0043436||GO:0044237||GO:0044238||GO:0044249||GO:0044255||GO:0044281||GO:0044283||GO:0046394||GO:0071704||GO:0072330||GO:1901576	fatty acid biosynthetic process||oxidation-reduction process||metabolic process||organic acid metabolic process||lipid metabolic process||fatty acid metabolic process||biological_process||lipid biosynthetic process||biosynthetic process||cellular process||organic acid biosynthetic process||carboxylic acid metabolic process||monocarboxylic acid metabolic process||oxoacid metabolic process||cellula…			GO:0005506||GO:0016491||GO:0003674||GO:0005488||GO:0046872||GO:0043167||GO:0043169||GO:0046914||GO:0003824	iron ion binding||oxidoreductase activity||molecular_function||binding||metal ion binding||ion binding||cation binding||transition metal ion binding||catalytic activity	--	--
7204657	0.323962	0.233949	0.443715	-1.28269	1.28078e-06	1.7554e-05	PHATR_36821	NC_011679.1	444744	446055	-	1161	protein_coding	predicted protein && Q5RCE0.3 RecName: Full=Glycerol-3-phosphate dehydrogenase [NAD(+)], cytoplasmic; Short=GPD-C; Short=GPDH-C && PF07479:NAD-dependent glycerol-3-phosphate dehydrogenase C-terminus|PF01210:NAD-dependent glycerol-3-phosphate dehydrogenase N-terminus	NAD_Gly3P_dh_C	GO:0005975||GO:0055114||GO:0046168||GO:0008152||GO:0008150||GO:0044238||GO:0071704||GO:0006072||GO:0006793||GO:0006796||GO:0009056||GO:0009987||GO:0019637||GO:0044237||GO:0046434||GO:0052646||GO:1901135||GO:1901136||GO:1901575	carbohydrate metabolic process||oxidation-reduction process||glycerol-3-phosphate catabolic process||metabolic process||biological_process||primary metabolic process||organic substance metabolic process||glycerol-3-phosphate metabolic process||phosphorus metabolic process||phosphate-containing compound metabolic process||catabolic process||cellular process||organophosphate metabolic process||cell…			GO:0004367||GO:0016616||GO:0051287||GO:0003674||GO:0003824||GO:0016491||GO:0016614||GO:0000166||GO:0005488||GO:0036094||GO:0048037||GO:0050662||GO:0097159||GO:1901265||GO:1901363	glycerol-3-phosphate dehydrogenase [NAD+] activity||oxidoreductase activity, acting on the CH-OH group of donors, NAD or NADP as acceptor||NAD binding||molecular_function||catalytic activity||oxidoreductase activity||oxidoreductase activity, acting on CH-OH group of donors||nucleotide binding||binding||small molecule binding||cofactor binding||coenzyme binding||organic cyclic compound binding||nu…	pti00564||pti01110	Glycerophospholipid metabolism||Biosynthesis of secondary metabolites
7197242	-0.934473	2.06106e-05	0.000547174	-1.2932	1.77938e-07	2.9139e-06	HemA	NC_011670.1	1232245	1234274	+	1763	protein_coding	glutamyl-trna reductase && Q117I4.1 RecName: Full=Glutamyl-tRNA reductase; Short=GluTR && PF00745:Glutamyl-tRNAGlu reductase, dimerisation domain|PF01488:Shikimate / quinate 5-dehydrogenase|PF05201:Glutamyl-tRNAGlu reductase, N-terminal domain	-	GO:0033014||GO:0055114||GO:0008152||GO:0006725||GO:0006807||GO:0008150||GO:0009058||GO:0009987||GO:0018130||GO:0019438||GO:0033013||GO:0034641||GO:0044237||GO:0044249||GO:0044271||GO:0046483||GO:0071704||GO:1901360||GO:1901362||GO:1901564||GO:1901566||GO:1901576	tetrapyrrole biosynthetic process||oxidation-reduction process||metabolic process||cellular aromatic compound metabolic process||nitrogen compound metabolic process||biological_process||biosynthetic process||cellular process||heterocycle biosynthetic process||aromatic compound biosynthetic process||tetrapyrrole metabolic process||cellular nitrogen compound metabolic process||cellular metabolic pr…			GO:0008883||GO:0050661||GO:0003674||GO:0003824||GO:0016491||GO:0016620||GO:0016903||GO:0140098||GO:0140101||GO:0000166||GO:0005488||GO:0036094||GO:0048037||GO:0050662||GO:0097159||GO:1901265||GO:1901363	glutamyl-tRNA reductase activity||NADP binding||molecular_function||catalytic activity||oxidoreductase activity||oxidoreductase activity, acting on the aldehyde or oxo group of donors, NAD or NADP as acceptor||oxidoreductase activity, acting on the aldehyde or oxo group of donors||catalytic activity, acting on RNA||catalytic activity, acting on a tRNA||nucleotide binding||binding||small molecule …	pti00860||pti01100||pti01110	Porphyrin and chlorophyll metabolism||Metabolic pathways||Biosynthesis of secondary metabolites
7204829	-1.40244	3.59411e-07	1.8943e-05	-1.46065	3.13446e-11	1.08436e-09	DXS	NW_002238036.1	15762	18609	-	2476	protein_coding	precursor of synthase DXS 1-deoxy-d-xylulose-5-phosphate synthase && B6IRB5.1 RecName: Full=1-deoxy-D-xylulose-5-phosphate synthase; AltName: Full=1-deoxyxylulose-5-phosphate synthase; Short=DXP synthase; Short=DXPS && PF02780:Transketolase, C-terminal domain|PF02779:Transketolase, pyrimidine binding domain|PF13292:1-deoxy-D-xylulose-5-phosphate synthase	-	GO:0008152||GO:0016114||GO:0008150||GO:0006629||GO:0006720||GO:0006721||GO:0008299||GO:0008610||GO:0009058||GO:0009987||GO:0044237||GO:0044238||GO:0044249||GO:0044255||GO:0071704||GO:1901576	metabolic process||terpenoid biosynthetic process||biological_process||lipid metabolic process||isoprenoid metabolic process||terpenoid metabolic process||isoprenoid biosynthetic process||lipid biosynthetic process||biosynthetic process||cellular process||cellular metabolic process||primary metabolic process||cellular biosynthetic process||cellular lipid metabolic process||organic substance metab…			GO:0003824||GO:0008661||GO:0003674||GO:0016740||GO:0016744	catalytic activity||1-deoxy-D-xylulose-5-phosphate synthase activity||molecular_function||transferase activity||transferase activity, transferring aldehyde or ketonic groups	pti00730||pti00900||pti01100||pti01110	Thiamine metabolism||Terpenoid backbone biosynthesis||Metabolic pathways||Biosynthesis of secondary metabolites
7202859	-1.28013	7.41848e-08	5.38942e-06	-1.50028	5.43375e-15	3.45927e-13	PHATRDRAFT_21829	NC_011682.1	480692	481573	-	882	protein_coding	predicted protein && Q5N8G1.1 RecName: Full=2-C-methyl-D-erythritol 4-phosphate cytidylyltransferase, chloroplastic; AltName: Full=4-diphosphocytidyl-2C-methyl-D-erythritol synthase; Short=OsCMS; AltName: Full=MEP cytidylyltransferase; Flags: Precursor && PF01128:2-C-methyl-D-erythritol 4-phosphate cytidylyltransferase	-	GO:0008299||GO:0008152||GO:0006629||GO:0006720||GO:0008150||GO:0008610||GO:0009058||GO:0009987||GO:0044237||GO:0044238||GO:0044249||GO:0044255||GO:0071704||GO:1901576	isoprenoid biosynthetic process||metabolic process||lipid metabolic process||isoprenoid metabolic process||biological_process||lipid biosynthetic process||biosynthetic process||cellular process||cellular metabolic process||primary metabolic process||cellular biosynthetic process||cellular lipid metabolic process||organic substance metabolic process||organic substance biosynthetic process			GO:0050518||GO:0003674||GO:0003824||GO:0016740||GO:0016772||GO:0016779||GO:0070567	2-C-methyl-D-erythritol 4-phosphate cytidylyltransferase activity||molecular_function||catalytic activity||transferase activity||transferase activity, transferring phosphorus-containing groups||nucleotidyltransferase activity||cytidylyltransferase activity	pti00900||pti01100||pti01110	Terpenoid backbone biosynthesis||Metabolic pathways||Biosynthesis of secondary metabolites
7195358	-1.09486	0.000174772	0.00297155	-1.59998	5.69262e-08	1.07451e-06	PHATRDRAFT_15595	NC_011688.1	83339	84421	-	1083	protein_coding	predicted protein && Q8YXE4.1 RecName: Full=Tryptophan--tRNA ligase; AltName: Full=Tryptophanyl-tRNA synthetase; Short=TrpRS && PF00579:tRNA synthetases class I (W and Y)	-	GO:0006418||GO:0008152||GO:0006082||GO:0006139||GO:0006399||GO:0006412||GO:0006518||GO:0006520||GO:0006725||GO:0006807||GO:0008150||GO:0009058||GO:0009059||GO:0009987||GO:0010467||GO:0016070||GO:0019538||GO:0019752||GO:0034641||GO:0034645||GO:0034660||GO:0043038||GO:0043039||GO:0043043||GO:0043170||GO:0043436||GO:0043603||GO:0043604||GO:0044237||GO:0044238||GO:0044249||GO:0044260||GO:0044267||GO:…	tRNA aminoacylation for protein translation||metabolic process||organic acid metabolic process||nucleobase-containing compound metabolic process||tRNA metabolic process||translation||peptide metabolic process||cellular amino acid metabolic process||cellular aromatic compound metabolic process||nitrogen compound metabolic process||biological_process||biosynthetic process||macromolecule biosyntheti…			GO:0000166||GO:0004812||GO:0005524||GO:0003674||GO:0005488||GO:0036094||GO:0097159||GO:1901265||GO:1901363||GO:0003824||GO:0016874||GO:0016875||GO:0140098||GO:0140101||GO:0008144||GO:0017076||GO:0030554||GO:0032553||GO:0032555||GO:0032559||GO:0035639||GO:0043167||GO:0043168||GO:0097367	nucleotide binding||aminoacyl-tRNA ligase activity||ATP binding||molecular_function||binding||small molecule binding||organic cyclic compound binding||nucleoside phosphate binding||heterocyclic compound binding||catalytic activity||ligase activity||ligase activity, forming carbon-oxygen bonds||catalytic activity, acting on RNA||catalytic activity, acting on a tRNA||drug binding||purine nucleotide…	--	--
7203267	-1.0032	1.46052e-05	0.000421006	-1.68519	2.69796e-14	1.51976e-12	GDCP	NC_011684.1	205248	208721	-	3116	protein_coding	glycine decarboxylase p- protein && Q87I05.1 RecName: Full=Glycine dehydrogenase (decarboxylating); AltName: Full=Glycine cleavage system P-protein; AltName: Full=Glycine decarboxylase; AltName: Full=Glycine dehydrogenase (aminomethyl-transferring) && PF02347:Glycine cleavage system P-protein	-	GO:0006546||GO:0055114||GO:0001505||GO:0008152||GO:0006082||GO:0006520||GO:0006544||GO:0006807||GO:0008150||GO:0009056||GO:0009063||GO:0009069||GO:0009071||GO:0009987||GO:0016054||GO:0017144||GO:0019752||GO:0042133||GO:0042135||GO:0042737||GO:0043436||GO:0044237||GO:0044238||GO:0044248||GO:0044281||GO:0044282||GO:0046395||GO:0065007||GO:0065008||GO:0071704||GO:1901564||GO:1901565||GO:1901575||GO:…	glycine catabolic process||oxidation-reduction process||regulation of neurotransmitter levels||metabolic process||organic acid metabolic process||cellular amino acid metabolic process||glycine metabolic process||nitrogen compound metabolic process||biological_process||catabolic process||cellular amino acid catabolic process||serine family amino acid metabolic process||serine family amino acid cat…			GO:0004375||GO:0003674||GO:0003824||GO:0016491||GO:0016638||GO:0016642	glycine dehydrogenase (decarboxylating) activity||molecular_function||catalytic activity||oxidoreductase activity||oxidoreductase activity, acting on the CH-NH2 group of donors||oxidoreductase activity, acting on the CH-NH2 group of donors, disulfide as acceptor	pti00260||pti00630||pti01100||pti01110||pti01200	Glycine, serine and threonine metabolism||Glyoxylate and dicarboxylate metabolism||Metabolic pathways||Biosynthesis of secondary metabolites||Carbon metabolism
7198277	-1.7455	1.1797e-09	1.47489e-07	-1.68818	3.57065e-11	1.21572e-09	hemE	NC_011691.1	201081	202181	+	1101	protein_coding	uroporphyrinogen decarboxylase && Q2S1W0.1 RecName: Full=Uroporphyrinogen decarboxylase; Short=UPD; Short=URO-D && PF01208:Uroporphyrinogen decarboxylase (URO-D)	-	GO:0006779||GO:0008152||GO:0006725||GO:0006778||GO:0006807||GO:0008150||GO:0009058||GO:0009987||GO:0018130||GO:0019438||GO:0033013||GO:0033014||GO:0034641||GO:0044237||GO:0044249||GO:0044271||GO:0046483||GO:0051186||GO:0051188||GO:0071704||GO:1901360||GO:1901362||GO:1901564||GO:1901566||GO:1901576	porphyrin-containing compound biosynthetic process||metabolic process||cellular aromatic compound metabolic process||porphyrin-containing compound metabolic process||nitrogen compound metabolic process||biological_process||biosynthetic process||cellular process||heterocycle biosynthetic process||aromatic compound biosynthetic process||tetrapyrrole metabolic process||tetrapyrrole biosynthetic proc…			GO:0004853||GO:0003674||GO:0003824||GO:0016829||GO:0016830||GO:0016831	uroporphyrinogen decarboxylase activity||molecular_function||catalytic activity||lyase activity||carbon-carbon lyase activity||carboxy-lyase activity	pti00860||pti01100||pti01110	Porphyrin and chlorophyll metabolism||Metabolic pathways||Biosynthesis of secondary metabolites
7202809	-2.50864	2.76505e-09	3.06493e-07	-2.00106	0.000592116	0.00375402	PHATRDRAFT_47593	NC_011682.1	213921	215912	-	1992	protein_coding	predicted protein && - && PF04116:Fatty acid hydroxylase superfamily	-	GO:0006633||GO:0055114||GO:0008152||GO:0006082||GO:0006629||GO:0006631||GO:0008150||GO:0008610||GO:0009058||GO:0009987||GO:0016053||GO:0019752||GO:0032787||GO:0043436||GO:0044237||GO:0044238||GO:0044249||GO:0044255||GO:0044281||GO:0044283||GO:0046394||GO:0071704||GO:0072330||GO:1901576	fatty acid biosynthetic process||oxidation-reduction process||metabolic process||organic acid metabolic process||lipid metabolic process||fatty acid metabolic process||biological_process||lipid biosynthetic process||biosynthetic process||cellular process||organic acid biosynthetic process||carboxylic acid metabolic process||monocarboxylic acid metabolic process||oxoacid metabolic process||cellula…			GO:0005506||GO:0016491||GO:0003674||GO:0005488||GO:0046872||GO:0043167||GO:0043169||GO:0046914||GO:0003824	iron ion binding||oxidoreductase activity||molecular_function||binding||metal ion binding||ion binding||cation binding||transition metal ion binding||catalytic activity	--	--
7195695	-1.86903	1.76101e-08	1.63228e-06	-2.53159	1.05334e-18	1.14474e-16	FTHFS	NC_011689.1	296045	298201	-	2001	protein_coding	fomate-tetrahydrofolate ligase && P28723.3 RecName: Full=Formate--tetrahydrofolate ligase; AltName: Full=10-formyletrahydrofolate synthetase; Short=FHS; Short=FTHFS; AltName: Full=Formyltetrahydrofolate synthetase && PF01268:Formate--tetrahydrofolate ligase	-	GO:0009396||GO:0008152||GO:0006082||GO:0006575||GO:0006725||GO:0006732||GO:0006760||GO:0006807||GO:0008150||GO:0009058||GO:0009108||GO:0009987||GO:0016053||GO:0018130||GO:0019438||GO:0019752||GO:0034641||GO:0042398||GO:0042558||GO:0042559||GO:0043436||GO:0043603||GO:0043604||GO:0044237||GO:0044249||GO:0044271||GO:0044281||GO:0044283||GO:0046394||GO:0046483||GO:0051186||GO:0051188||GO:0071704||GO:…	folic acid-containing compound biosynthetic process||metabolic process||organic acid metabolic process||cellular modified amino acid metabolic process||cellular aromatic compound metabolic process||coenzyme metabolic process||folic acid-containing compound metabolic process||nitrogen compound metabolic process||biological_process||biosynthetic process||coenzyme biosynthetic process||cellular proc…			GO:0004329||GO:0005524||GO:0003674||GO:0003824||GO:0016874||GO:0016879||GO:0000166||GO:0005488||GO:0008144||GO:0017076||GO:0030554||GO:0032553||GO:0032555||GO:0032559||GO:0035639||GO:0036094||GO:0043167||GO:0043168||GO:0097159||GO:0097367||GO:1901265||GO:1901363	formate-tetrahydrofolate ligase activity||ATP binding||molecular_function||catalytic activity||ligase activity||ligase activity, forming carbon-nitrogen bonds||nucleotide binding||binding||drug binding||purine nucleotide binding||adenyl nucleotide binding||ribonucleotide binding||purine ribonucleotide binding||adenyl ribonucleotide binding||purine ribonucleoside triphosphate binding||small molecu…	--	--
7195079	-2.39966	3.08289e-13	8.4993e-11	-3.62867	1.58262e-26	3.86987e-24	PHATRDRAFT_42247	NC_011687.1	356590	357993	-	1404	protein_coding	predicted protein && Q6MEC9.1 RecName: Full=Asparagine--tRNA ligase; AltName: Full=Asparaginyl-tRNA synthetase; Short=AsnRS && PF00152:tRNA synthetases class II (D, K and N)|PF01336:OB-fold nucleic acid binding domain	tRNA-synt_2	GO:0006418||GO:0008152||GO:0006082||GO:0006139||GO:0006399||GO:0006412||GO:0006518||GO:0006520||GO:0006725||GO:0006807||GO:0008150||GO:0009058||GO:0009059||GO:0009987||GO:0010467||GO:0016070||GO:0019538||GO:0019752||GO:0034641||GO:0034645||GO:0034660||GO:0043038||GO:0043039||GO:0043043||GO:0043170||GO:0043436||GO:0043603||GO:0043604||GO:0044237||GO:0044238||GO:0044249||GO:0044260||GO:0044267||GO:…	tRNA aminoacylation for protein translation||metabolic process||organic acid metabolic process||nucleobase-containing compound metabolic process||tRNA metabolic process||translation||peptide metabolic process||cellular amino acid metabolic process||cellular aromatic compound metabolic process||nitrogen compound metabolic process||biological_process||biosynthetic process||macromolecule biosyntheti…			GO:0000166||GO:0004812||GO:0005524||GO:0003676||GO:0003674||GO:0005488||GO:0036094||GO:0097159||GO:1901265||GO:1901363||GO:0003824||GO:0016874||GO:0016875||GO:0140098||GO:0140101||GO:0008144||GO:0017076||GO:0030554||GO:0032553||GO:0032555||GO:0032559||GO:0035639||GO:0043167||GO:0043168||GO:0097367	nucleotide binding||aminoacyl-tRNA ligase activity||ATP binding||nucleic acid binding||molecular_function||binding||small molecule binding||organic cyclic compound binding||nucleoside phosphate binding||heterocyclic compound binding||catalytic activity||ligase activity||ligase activity, forming carbon-oxygen bonds||catalytic activity, acting on RNA||catalytic activity, acting on a tRNA||drug bind…	pti00970	Aminoacyl-tRNA biosynthesis
